# Supplementary material for: Copper-catalyzed N-alkylation of amides and amines with alcohols employing the aerobic relay race methodology
Source: Royal Society of Chemistry journal article supplement (doi:10.1039/c1ob06743e), 2012-01-01

## Electronic Supplementary Information

### Copper-Catalyzed *N*-Alkylation of Amides and Amines with Alcohols Employing the Aerobic Relay Race Methodology

Qiang Li, Songjian Fan, Qing Sun, Haiwen Tian, Xiaochun Yu and Qing Xu\*

*College of Chemistry and Materials Engineering, Wenzhou University, Wenzhou University Town,  
Wenzhou 325025, China*

*qing-xu@wzu.edu.cn*

#### Table of Contents

|                                                                     |     |
|---------------------------------------------------------------------|-----|
| Condition Screening Tables.....                                     | S2  |
| General.....                                                        | S5  |
| Synthetic Procedures and Characterization of Products.....          | S5  |
| References.....                                                     | S14 |
| Elementary Reactions and Mechanistic Studies.....                   | S15 |
| <sup>1</sup> H and <sup>13</sup> C NMR Spectra of the Products..... | S18 |

**Table S1.** Catalyst Screening.<sup>[a]</sup> Catalytic Activities of Cu(OAc)<sub>2</sub> and Cu(OAc)<sub>2</sub>·H<sub>2</sub>O

$$\text{PhCH}_2\text{OH} + \text{PhSO}_2\text{NH}_2 \xrightarrow[\text{air, T, t}]{\text{cat. Cu, K}_2\text{CO}_3} \text{Ph-CH}_2\text{-NH-SO}_2\text{Ph} \left( \text{Ph-CH=NSO}_2\text{Ph} \right)$$

**1a**  
4 equiv.
**2a**  
2 mmol
**3aa**
**5aa**

| run              | Cu (mol%)                                  | K <sub>2</sub> CO <sub>3</sub> (mol%) | T, t         | <b>3aa</b> % <sup>[b]</sup> |
|------------------|--------------------------------------------|---------------------------------------|--------------|-----------------------------|
| 1 <sup>[c]</sup> | Cu(OAc) <sub>2</sub> (1)                   | 20                                    | 150 °C, 12 h | >99                         |
| 2 <sup>[c]</sup> | Cu(OAc) <sub>2</sub> ·H <sub>2</sub> O (1) | 20                                    | 150 °C, 12 h | >99                         |
| 3 <sup>[d]</sup> | Cu(OAc) <sub>2</sub> (5)                   | 100                                   | 120 °C, 12 h | >99                         |
| 4 <sup>[d]</sup> | Cu(OAc) <sub>2</sub> ·H <sub>2</sub> O (5) | 100                                   | 120 °C, 12 h | >99                         |
| 5                | Cu(OAc) <sub>2</sub> (5)                   | 10                                    | 150 °C, 12 h | >99                         |
| 6                | Cu(OAc) <sub>2</sub> ·H <sub>2</sub> O (5) | 10                                    | 150 °C, 12 h | >99                         |

[a] Commercial **1a** without any treatment was used. [b] GC yield based on **2a**. [c] Repeating the literature condition (*Angew. Chem. Int. Ed.* **2009**, *48*, 5912; *Adv. Synth. Catal.* **2009**, *351*, 2949). [d] Our original condition (*Chin. Chem. Lett.* **2011**, *22*, 1021; *J. Org. Chem.* **2011**, *76*, 5759).

**Table S2.** Condition Screening and Optimization.

$$\text{PhCH}_2\text{OH} + \text{PhSO}_2\text{NH}_2 \xrightarrow[\text{K}_2\text{CO}_3, \text{air, T, t}]{\text{cat. Cu(OAc)}_2\cdot\text{H}_2\text{O}} \text{Ph-CH}_2\text{-NH-SO}_2\text{Ph} \left( \text{Ph-CH=NSO}_2\text{Ph} \right)$$

**1a**
**2a**
**3aa**
**5aa**

| run               | Cu (mol%)/ <b>1a</b> (mol/mol) | K <sub>2</sub> CO <sub>3</sub> (mol%)/ <b>1a</b> (mol/mol) | T, t         | <b>3aa</b> % <sup>[a]</sup> |
|-------------------|--------------------------------|------------------------------------------------------------|--------------|-----------------------------|
| 1 <sup>[b]</sup>  | 2, 0.0033                      | 100, 0.167                                                 | 120 °C, 12 h | 70                          |
| 2 <sup>[b]</sup>  | 2, 0.0033                      | 50, 0.083                                                  | 120 °C, 12 h | 56                          |
| 3 <sup>[c]</sup>  | 1, 0.0025                      | 100, 0.25                                                  | 120 °C, 12 h | 97                          |
| 4 <sup>[c]</sup>  | 1, 0.0025                      | 50, 0.125                                                  | 120 °C, 12 h | 89                          |
| 5 <sup>[c]</sup>  | 1, 0.0025                      | 10, 0.025                                                  | 120 °C, 12 h | 31                          |
| 6 <sup>[c]</sup>  | 1, 0.0025                      | 50, 0.125                                                  | 135 °C, 12 h | 99                          |
| 7 <sup>[c]</sup>  | 1, 0.0025                      | 20, 0.05                                                   | 135 °C, 12 h | 77                          |
| 8 <sup>[c]</sup>  | 1, 0.0025                      | 10, 0.025                                                  | 135 °C, 12 h | 41                          |
| 9 <sup>[c]</sup>  | 1, 0.0025                      | 20, 0.05                                                   | 150 °C, 12 h | 99                          |
| 10 <sup>[c]</sup> | 1, 0.0025                      | 20, 0.05                                                   | 150 °C, 12 h | 99 <sup>[e]</sup>           |
| 11 <sup>[c]</sup> | 1, 0.0025                      | 10, 0.025                                                  | 150 °C, 12 h | 31 <sup>[e]</sup>           |
| 12 <sup>[d]</sup> | 1, 0.0078                      | 10, 0.077                                                  | 135 °C, 24 h | 89                          |

[a] Commercial **1a** was directly used without further treatment. GC yield based on **2a**. Usually high **3aa/5aa** ratios (>99/1) were obtained. [b] Reactions with 6 mmol **1a** and 1 mmol **2a**. [c] Reactions with 4 mmol **1a** and 1 mmol **2a**. [d] Reactions with 2.6 mmol **1a** and 2 mmol **2a**. [e] Anhydrous Cu(OAc)<sub>2</sub> was used.

**Table S3.** Additive Effects on Cu-Catalyzed Aerobic *N*-Alkylation of Sulfonamide in the Presence of Large Excess Alcohol.<sup>[a]</sup>

| PhCH <sub>2</sub> OH + PhSO <sub>2</sub> NH <sub>2</sub> |                                                                   | additive                                                                       |                           | Ph-CH <sub>2</sub> -NH-SO <sub>2</sub> -Ph + PhCHO |           |
|----------------------------------------------------------|-------------------------------------------------------------------|--------------------------------------------------------------------------------|---------------------------|----------------------------------------------------|-----------|
| <b>1a</b><br>4 eq                                        | <b>2a</b><br>1mmol                                                | [Cu] (1 mol%)<br>K <sub>2</sub> CO <sub>3</sub> (20 mol%)<br>air, 120 °C, 12 h |                           | <b>3aa</b>                                         | <b>4a</b> |
| Run                                                      | [Cu] (1 mol%)                                                     | additive (mol%)                                                                | <b>3aa</b> <sup>[b]</sup> | <b>4a</b> <sup>[b]</sup>                           |           |
| 1                                                        |                                                                   | -                                                                              | 57                        | 6                                                  |           |
| 2 <sup>[c]</sup>                                         |                                                                   | O <sub>2</sub>                                                                 | 30                        | 34 ( <b>5aa</b> , 29)                              |           |
| 3                                                        | Cu(OAc) <sub>2</sub> ·H <sub>2</sub> O                            | Bipy (1 mol%)                                                                  | 71                        | 6                                                  |           |
| 4                                                        |                                                                   | Bipy (1 mol%)<br>TEMPO (2 mol%)                                                | 99                        | 12                                                 |           |
| 5                                                        |                                                                   | Bipy (1 mol%)                                                                  | ND                        | -                                                  |           |
| 6                                                        | Cu(OAc) <sub>2</sub> ·H <sub>2</sub> O<br>(under N <sub>2</sub> ) | Bipy (1 mol%)<br>TEMPO (2 mol%)                                                | ND                        | -                                                  |           |
| 7                                                        |                                                                   | -                                                                              | Trace                     | -                                                  |           |
| 8                                                        | CuBr <sub>2</sub>                                                 | Bipy (1 mol%)<br>TEMPO (2 mol%)                                                | 96                        | 15                                                 |           |
| 9                                                        |                                                                   | -                                                                              | 66                        | 6                                                  |           |
| 10                                                       | CuCl <sub>2</sub> ·2H <sub>2</sub> O                              | Bipy (1 mol%)<br>TEMPO (2 mol%)                                                | 99                        | 9                                                  |           |
| 11                                                       |                                                                   | -                                                                              | 59                        | 6                                                  |           |
| 12                                                       | Cu(NO <sub>3</sub> ) <sub>2</sub> ·3H <sub>2</sub> O              | Bipy (1 mol%)<br>TEMPO (2 mol%)                                                | 99                        | 12                                                 |           |
| 13                                                       |                                                                   | -                                                                              | ND                        | -                                                  |           |
| 14                                                       | CuSO <sub>4</sub>                                                 | Bipy (1 mol%)<br>TEMPO (2 mol%)                                                | 83                        | 8                                                  |           |
| 15                                                       |                                                                   | -                                                                              | 44                        | 5                                                  |           |
| 16                                                       | CuI                                                               | Bipy (1 mol%)<br>TEMPO (2 mol%)                                                | 88                        | 9                                                  |           |

[a] Absolute **1a** (100% GC purity) was used. [b] GC yield. [c] Reaction carried out under pure O<sub>2</sub> (1 atm.) in a 20 mL tube (ca. 90 mol% O<sub>2</sub>).

**Table S4.** Imine-Promoted *N*-Alkylation Reaction of Sulfonamide.<sup>[a]</sup>

| PhCH <sub>2</sub> OH + PhSO <sub>2</sub> NH <sub>2</sub> |                    | 5aa (10 mol%)                                                                                            |                               | Ph-CH <sub>2</sub> -NH-SO <sub>2</sub> -Ph |  |
|----------------------------------------------------------|--------------------|----------------------------------------------------------------------------------------------------------|-------------------------------|--------------------------------------------|--|
| <b>1a</b><br>x equiv.                                    | <b>2a</b>          | Cu(OAc) <sub>2</sub> ·H <sub>2</sub> O (1 mol%)<br>K <sub>2</sub> CO <sub>3</sub> (z mol%)<br>atm., T, t |                               | <b>3aa</b>                                 |  |
| Run                                                      | <b>1a</b> (equiv.) | K <sub>2</sub> CO <sub>3</sub> (mol%)                                                                    | atm., T, t                    | <b>3aa</b> % <sup>a</sup>                  |  |
| 1                                                        | 4                  | 20                                                                                                       | air, 120 °C, 12 h             | 72                                         |  |
| 2                                                        | 4                  | 20                                                                                                       | N <sub>2</sub> , 120 °C, 12 h | 67                                         |  |
| 3                                                        | 1.3                | 10                                                                                                       | air, 135 °C, 24 h             | 91                                         |  |
| 4                                                        | 1.3                | 10                                                                                                       | N <sub>2</sub> , 135 °C, 24 h | 95                                         |  |

[a] Absolute **1a** (100% GC purity) was used.



**General.** Substrates, bases and catalysts are all purchased. All reactions were carried out in sealed Schlenk tubes and monitored by TLC, GC-MS and/or  $^1\text{H}$  NMR. Unless otherwise noted, substrates and catalysts were used as purchased without further purification and degassing in reactions carried out under air. As analyzed, samples of commercial benzyl alcohol are usually contaminated by trace amount of benzaldehyde. Thus, in control reactions and mechanistic studies where needed, absolute alcohols (freshly distilled from  $\text{CaH}_2$ , degassed and stored under  $\text{N}_2$  in a Schlenk flask, 100% purity without any contaminants as confirmed by GC analysis) was used as noted. Products were purified by column chromatography on silica gel using petroleum ether and ethyl acetate as eluent.  $^1\text{H}$  and  $^{13}\text{C}$  NMR spectra were recorded on a Bruker Avance-III 500 instrument (500 MHz for  $^1\text{H}$  and 125.4 MHz for  $^{13}\text{C}$  NMR spectroscopy). Unless otherwise noted,  $\text{CDCl}_3$  was used as the solvent. Chemical shift values for  $^1\text{H}$  and  $^{13}\text{C}$  NMR were referred to internal  $\text{Me}_4\text{Si}$  (0 ppm). Mass spectra were measured on a Shimadzu GCMS-QP2010 Plus spectrometer (EI). HRMS (EI) analysis was performed by the Analytical Center at the Shanghai Institute of Organic Chemistry, Chinese Academy of Sciences.

**Typical Procedure for Copper-Catalyzed Aerobic *N*-Alkylation of Amides and Amines with Alcohols.** The mixture of benzenesulfonamide **2a** (0.471 g, 3.0 mmol),  $\text{Cu}(\text{OAc})_2 \cdot \text{H}_2\text{O}$  (0.006 g, 0.03 mmol, 1 mol%), and  $\text{K}_2\text{CO}_3$  (0.042 g, 0.3 mmol, 10 mol%) in benzyl alcohol **1a** (0.39 mL, 3.9 mmol, 1.3 equiv.) was stirred at  $135^\circ\text{C}$  under air in a sealed 20 mL Schlenk tube and monitored by TLC and/or GC-MS. The reaction was then quenched with ethyl acetate and the crude product was purified by column chromatography with ethyl acetate and petroleum ether ( $60\text{-}90^\circ\text{C}$ ) as eluent, giving *N*-benzylbenzenesulfonamide **3aa** in 78% isolated yield.

#### Characterization of Products:

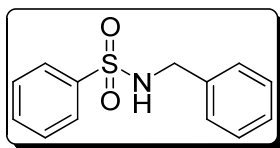

***N*-Benzylbenzenesulfonamide (3aa).** White solid.  $^1\text{H}$  NMR (500 MHz,  $\text{CDCl}_3$ ):  $\delta$  7.88-7.86 (m, 2H), 7.60-7.57 (m, 1H), 7.52-7.49 (m, 2H), 7.27-7.25 (m, 3H), 7.19-7.18 (m, 2H), 4.83 (b, 1H), 4.14 (d,  $J = 6.2$  Hz, 2H).  $^{13}\text{C}$  NMR (125.4 MHz,  $\text{CDCl}_3$ ):  $\delta$  139.9, 136.3, 132.6, 129.1, 128.6, 127.84, 127.81, 127.1, 47.2. MS (EI):  $m/z$  (%) 246 (0.26), 143 (4.63), 141 (3.97), 125 (5.14), 106 (100), 104 (12), 91 (14), 79 (21), 78 (15), 77 (43), 65 (5), 51 (17). This compound was known. <sup>1</sup>

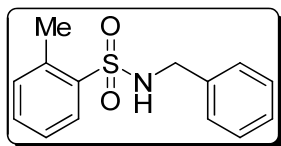

**N-Benzyl-o-toluenesulfonamide (3ab).** White oil.  $^1\text{H}$  NMR (500 MHz,  $\text{CDCl}_3$ ):  $\delta$  8.00 (d,  $J = 7.7$  Hz, 1H), 7.48-7.45 (m, 1H), 7.34-7.27 (m, 5H), 7.17-7.15 (m, 2H), 4.67 (b, 1H), 4.12 (d,  $J = 6.1$  Hz, 2H), 2.62 (s, 3H).  $^{13}\text{C}$  NMR (125.4 MHz,  $\text{CDCl}_3$ ):  $\delta$  137.9, 137.1, 136.5, 132.7, 132.5, 129.4, 128.5, 127.8, 127.7, 126.1, 47.0, 20.2. MS (EI):  $m/z$  (%) 261 (0.13), 157 (2), 155 (1), 106 (100), 91 (50), 77 (12), 65 (18). This compound was known.<sup>6</sup>

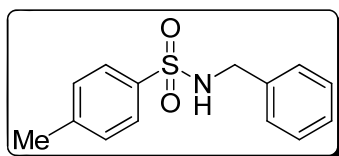

**N-Benzyl-p-toluenesulfonamide (3ac).** White solid.  $^1\text{H}$  NMR (500 MHz,  $\text{CDCl}_3$ ):  $\delta$  7.76 (d,  $J = 8.1$  Hz, 2H), 7.32-7.25 (m, 5H), 7.20-7.19 (m, 2H), 4.66 (b, 1H), 4.12 (d,  $J = 6.2$  Hz, 2H), 2.44 (s, 3H).  $^{13}\text{C}$  NMR (125.4 MHz,  $\text{CDCl}_3$ ):  $\delta$  143.4, 136.9, 136.4, 129.7, 128.6, 127.8, 127.7, 127.2, 47.2, 21.5. MS (EI):  $m/z$  (%) 261 (0.1), 260 (0.2), 157 (3), 107 (10), 106 (100), 92 (13), 91 (39), 79 (17), 77 (11). This compound was known.<sup>5</sup>

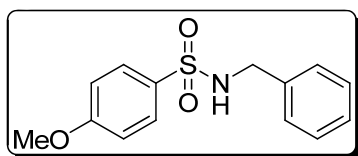

**N-Benzyl-4-methoxybenzenesulfonamide (3ad).** White solid.  $^1\text{H}$  NMR (500 MHz,  $\text{CDCl}_3$ ):  $\delta$  7.81 (d,  $J = 8.9$  Hz, 2H), 7.30-7.27 (m, 3H), 7.20-7.19 (m, 2H), 6.98 (d,  $J = 8.9$  Hz, 2H), 4.57 (bt,  $J = 5.7$  Hz, 1H), 4.12 (d,  $J = 6.2$  Hz, 2H), 3.88 (s, 3H).  $^{13}\text{C}$  NMR (125.4 MHz,  $\text{CDCl}_3$ ):  $\delta$  163.0, 136.3, 131.5, 129.3, 128.7, 127.92, 127.89, 114.3, 55.6, 47.3. MS (EI):  $m/z$  (%) 277 (3), 212 (1), 171 (4), 155 (14), 127 (2), 123 (20), 108 (26), 106 (100), 91 (15), 79 (13), 77 (28), 64 (8). This compound was known.<sup>5</sup>

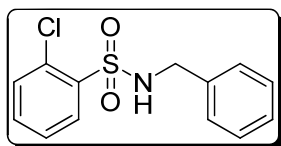

**N-Benzyl-2-chlorobenzenesulfonamide (3ae).** White solid.  $^1\text{H}$  NMR (500 MHz,  $\text{CDCl}_3$ ):  $\delta$  8.07 (d,  $J = 8.1$  Hz, 1H), 7.50-7.45 (m, 2H), 7.40-7.37 (m, 1H), 7.25-7.17 (m, 5H), 5.32 (b, 1H), 4.12 (d,  $J = 6.2$  Hz, 2H).  $^{13}\text{C}$  NMR (125.4 MHz,  $\text{CDCl}_3$ ):  $\delta$  137.3, 135.7, 133.7, 131.5, 131.4, 131.2, 128.7, 128.0, 127.9, 127.2, 47.5. MS (EI):  $m/z$  (%) 281 (0.1), 280 (0.2), 176 (5), 159 (5), 111 (13), 106 (100), 104

(15), 91 (17), 79 (18), 77 (18), 75 (10). This compound was known.<sup>1</sup>

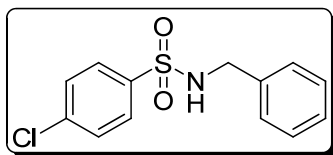

**N-Benzyl-4-chlorobenzenesulfonamide (3af).** White solid. <sup>1</sup>H NMR (500 MHz, CDCl<sub>3</sub>): δ 7.78 (d, *J* = 8.6 Hz, 2H), 7.46 (d, *J* = 8.6 Hz, 2H), 7.37 (d, *J* = 4.3 Hz, 1H), 7.28-7.26 (m, 2H), 7.19-7.17 (m, 2H), 4.87 (bt, *J* = 5.8 Hz, 1H), 4.15 (d, *J* = 6.1 Hz, 2H). <sup>13</sup>C NMR (125.4 MHz, CDCl<sub>3</sub>): δ 139.1, 138.6, 136.0, 129.3, 128.7, 128.5, 127.90, 127.86, 47.2. MS (EI): *m/z* (%) 281 (0.1), 280 (0.2), 112 (6), 111 (16), 107 (8), 106 (100), 104 (15), 91 (15), 79 (19), 77 (15), 75 (10). This compound was known.<sup>5</sup>

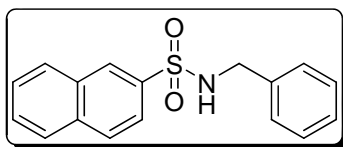

**N-Benzyl-2-naphthalenesulfonamide (3ag).** White solid. <sup>1</sup>H NMR (500 MHz, CDCl<sub>3</sub>): δ 8.45 (b, 1H), 7.98-7.92 (m, 3H), 7.85-7.83 (m, 1H), 7.66-7.62 (m, 2H), 7.25-7.18 (m, 5H), 4.71 (bt, *J* = 5.8 Hz, 1H), 4.18 (d, *J* = 6.1 Hz, 2H). <sup>13</sup>C NMR (125.4 MHz, CDCl<sub>3</sub>): δ 136.7, 136.2, 134.8, 132.1, 129.5, 129.2, 128.8, 128.6, 128.5, 127.9, 127.8, 127.5, 122.3, 47.3. MS (EI): *m/z* (%) 298 (2), 297 (11), 192 (5), 175 (2), 144 (8), 128 (50), 127 (57), 115 (8), 106 (100), 91 (16), 79 (11), 77 (19). This compound was known.<sup>5</sup>

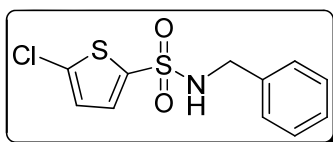

**N-Benzyl-5-chlorothiophene-2-sulfonamide (3ah).** Yellow solid. <sup>1</sup>H NMR (500MHz, CDCl<sub>3</sub>): δ 7.35-7.22 (m, 6H), 6.89 (d, *J* = 3.9 Hz, 1H), 5.03 (b, 1H), 4.21 (d, *J* = 6.0 Hz, 2H). <sup>13</sup>C NMR (125.4 MHz, CDCl<sub>3</sub>): δ 138.9, 137.4, 135.7, 131.7, 128.8, 128.1, 127.9, 126.7, 47.5. MS (EI): *m/z* (%) 287 (3), 252 (2), 222 (3), 181 (4), 165 (5), 133 (19), 118 (22), 106 (100), 91 (38), 79 (19), 51 (8). This compound was known.<sup>1</sup>

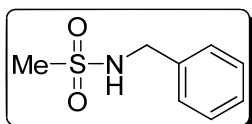

**N-Benzylmethanesulfonamide (3ai).** White solid. <sup>1</sup>H NMR (500 MHz, CDCl<sub>3</sub>): δ 7.36-7.27 (m, 5H), 5.20 (b, 1H), 4.27 (d, *J* = 6.2 Hz, 2H), 2.80 (s, 3H). <sup>13</sup>C NMR (125.4 MHz, CDCl<sub>3</sub>): δ 136.8, 128.8, 128.0, 127.9, 47.1, 40.9. MS (EI): *m/z* (%) 185 (1.2), 107 (8), 106 (100), 105 (18), 104 (44),

91 (29), 79 (31), 78 (12), 77 (20), 65(8), 51 (11). This compound was known.<sup>1</sup>

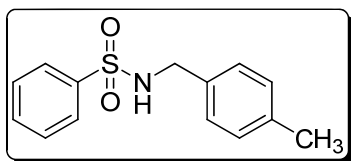

**N-(4-Methylbenzyl)benzenesulfonamide (3ba).** White solid. <sup>1</sup>H NMR (500 MHz, CDCl<sub>3</sub>): δ 7.89-7.87 (m, 2H), 7.61-7.58 (m, 1H), 7.54-7.51 (m, 2H), 7.10-7.06 (m, 4H), 4.58 (b, 1H), 4.11 (d, *J* = 6.1 Hz, 2H), 2.31 (s, 3H). <sup>13</sup>C NMR (125.4 MHz, CDCl<sub>3</sub>): δ 143.5, 137.0, 136.3, 129.7, 128.7, 127.94, 127.89, 127.2, 47.3, 21.5. MS (EI): *m/z* (%) 261 (0.4), 246 (0.1), 195 (0.3), 165 (0.3), 143 (3), 125 (3), 120 (100), 118 (30), 105 (13), 91 (18), 77 (33), 65 (9), 63 (2), 51 (10). This compound was known.<sup>10</sup>

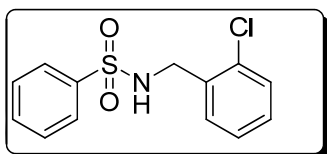

**N-(2-Chlorobenzyl)benzenesulfonamide (3ca).** White solid. <sup>1</sup>H NMR (500 MHz, CDCl<sub>3</sub>): δ 7.81-7.79 (m, 2H), 7.51-7.48 (m, 1H), 7.42-7.39 (m, 2H), 7.28-7.26 (m, 1H), 7.22-7.20 (m, 1H), 7.15-7.09(m, 2H), 5.48 (b, 1H), 4.24 (d, *J* = 6.5 Hz, 2H). <sup>13</sup>C NMR (125.4 MHz, CDCl<sub>3</sub>): δ 140.0, 133.8, 133.3, 132.6, 130.1, 129.4, 129.2, 129.0, 126.99, 126.94, 45.0. MS (EI): *m/z* (%) 281 (0.25), 246 (1.73), 142 (32), 141 (15), 140 (100), 125 (17), 113 (7), 89 (5), 77 (47), 51 (14). This compound was known.<sup>3</sup>

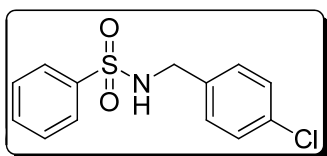

**N-(4-Chlorobenzyl)benzenesulfonamide (3da).** White solid. <sup>1</sup>H NMR (500 MHz, CDCl<sub>3</sub>): δ 7.84-7.82 (m, 2H), 7.59-7.56 (m, 1H), 7.50-7.47 (m, 2H), 7.21 (d, *J* = 8.4 Hz, 2H), 7.11 (d, *J* = 8.5 Hz, 2H), 5.17 (b, 1H), 4.10 (d, *J* = 6.3 Hz, 2H). <sup>13</sup>C NMR (125 MHz, CDCl<sub>3</sub>): δ 139.9, 134.9, 133.7, 132.8, 129.21, 129.17, 128.8, 127.0, 46.6. MS (EI): *m/z* (%) 281 (0.09), 280 (0.11), 142 (32), 140 (100), 138 (13), 125 (18), 113 (8), 89 (6), 77 (46). This compound was known.<sup>2</sup>

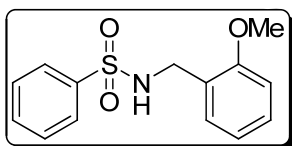

**N-(2-Methoxybenzyl)-benzenesulfonamide (3ea).** White oil. <sup>1</sup>H NMR (500 MHz, CDCl<sub>3</sub>): δ 7.86 (d, *J* = 7.2 Hz, 2H), 7.60-7.57 (m, 1H), 7.52-7.49 (m, 2H), 7.09 (d, *J* = 8.6 Hz, 2H), 6.79 (d, *J* = 8.7



Hz, 2H), 4.76 (bt,  $J = 5.7$  Hz, 1H), 4.07 (d,  $J = 6.1$  Hz, 1H), 3.77 (s, 2H).  $^{13}\text{C}$  NMR (125.4 MHz,  $\text{CDCl}_3$ ):  $\delta$  159.4, 140.1, 132.7, 129.3, 129.1, 128.7, 128.2, 127.1, 114.1, 114.0, 55.3, 46.9. MS (EI):  $m/z$  (%) 277 (5), 137 (9), 136 (100), 134 (20), 121 (15), 119 (13), 107 (11), 91 (25), 77 (37), 51 (13). This compound was known.<sup>9</sup>

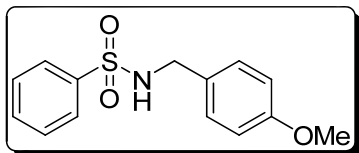

***N*-(4-Methoxybenzyl)benzenesulfonamide (3fa).** White solid.  $^1\text{H}$  NMR (500 MHz,  $\text{CDCl}_3$ ):  $\delta$  7.76 (d,  $J = 7.2$  Hz, 2H), 7.48-7.47 (m, 1H), 7.41-7.38 (m, 2H), 7.20-7.16 (m, 1H), 7.06-7.04 (m, 1H), 6.81-6.78 (m, 1H), 6.72 (d,  $J = 8.2$  Hz, 1H), 5.14 (bt,  $J = 6.0$  Hz, 1H), 4.17 (d,  $J = 6.4$  Hz, 2H), 3.73 (s, 3H).  $^{13}\text{C}$  NMR (125.4 MHz,  $\text{CDCl}_3$ ):  $\delta$  159.2, 140.0, 132.6, 129.2, 129.1, 128.3, 127.1, 114.0, 55.3, 46.7. MS (EI):  $m/z$  (%) 277 (5), 141 (2), 135 (100), 121 (29), 77 (26). This compound was known.<sup>4</sup>

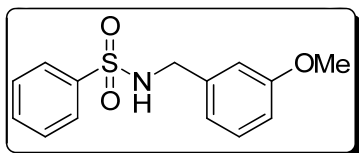

***N*-(3-Methoxybenzyl)benzenesulfonamide (3ga).** White solid.  $^1\text{H}$  NMR (500 MHz,  $\text{CDCl}_3$ ):  $\delta$  7.82 (d,  $J = 7.7$  Hz, 2H), 7.54-7.51 (m, 1H), 7.45-7.42 (m, 2H), 7.12-7.09 (m, 1H), 6.63-6.69 (m, 3H), 5.41 (b, 1H), 4.07 (d,  $J = 6.4$  Hz, 2H), 3.66 (s, 3H).  $^{13}\text{C}$  NMR (125.4 MHz,  $\text{CDCl}_3$ ):  $\delta$  159.7, 140.0, 137.9, 132.6, 129.6, 129.1, 127.0, 120.0, 113.6, 113.1, 55.1, 47.1. MS (EI):  $m/z$  (%) 277 (14), 141 (4), 136 (100), 121 (8), 109 (16), 105 (19), 77 (26), 65 (7), 51 (10). This compound was known.<sup>11</sup>

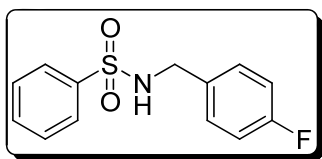

***N*-(4-Fluorobenzyl)benzenesulfonamide (3ha).** White solid.  $^1\text{H}$  NMR (500 MHz,  $\text{CDCl}_3$ ):  $\delta$  7.82-7.80 (m, 2H), 7.56-7.53 (m, 1H), 7.46-7.43 (m, 2H), 7.14-7.11 (m, 2H), 6.90-6.86 (m, 2H), 5.50 (b, 1H), 4.07 (d,  $J = 6.3$  Hz, 2H).  $^{13}\text{C}$  NMR (125.4 MHz,  $\text{CDCl}_3$ ):  $\delta$  162.8 (d,  $J_{\text{C-F}} = 246$  Hz), 139.9, 132.7, 132.2 (d,  $J_{\text{C-F}} = 2.5$  Hz), 129.6 (d,  $J_{\text{C-F}} = 8.75$  Hz), 129.1, 127.0, 115.4 (d,  $J_{\text{C-F}} = 21.3$  Hz), 46.5. MS (EI):  $m/z$  (%) 264 (0.2), 143 (6), 124 (100), 109 (16), 97 (13), 77 (27), 51 (10). HRMS Calcd for  $\text{C}_{13}\text{H}_{13}\text{FNO}_2\text{S}$  ( $\text{M}+\text{H}$ ): 266.0646; found: 266.0637.

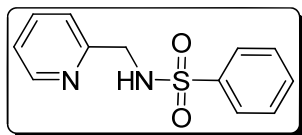

**N-(2-Pyridylmethyl)benzenesulfonamide (3ia).** Yellow solid.  $^1\text{H}$  NMR (500 MHz,  $\text{CDCl}_3$ ):  $\delta$  8.45 (d,  $J = 4.7$  Hz, 1H), 7.86 (d,  $J = 7.5$  Hz, 2H), 7.61-7.58 (m, 1H), 7.52 (t,  $J = 7.4$  Hz, 1H), 7.45 (t,  $J = 7.6$  Hz, 2H), 7.15 (t,  $J = 6.7$  Hz, 2H), 6.00 (s, 1H), 4.27 (d,  $J = 5.3$  Hz, 2H).  $^{13}\text{C}$  NMR (125.4 MHz,  $\text{CDCl}_3$ ):  $\delta$  154.8, 149.0, 139.7, 136.8, 132.6, 129.0, 127.2, 122.7, 122.0, 47.4. MS (EI):  $m/z$  (%) 247 (0.5), 185 (6), 184 (45), 183 (27), 168 (3), 156 (2), 141 (13), 125 (2), 107 (100), 106 (55), 92 (13), 80 (29), 79 (57), 78 (32), 77 (76), 65 (9), 51 (42). This compound was known.<sup>12</sup>

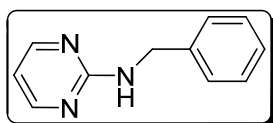

**N-Benzyl-(2-pyrimidyl)amine (3aj).** White solid.  $^1\text{H}$  NMR (500 MHz,  $\text{CDCl}_3$ ):  $\delta$  8.26 (d,  $J = 4.5$  Hz, 2H), 7.37-7.32 (m, 4H), 7.28-7.27 (m, 1H), 6.54 (t,  $J = 4.8$  Hz, 1H), 5.63 (b, 1H), 4.64 (d,  $J = 5.9$  Hz, 2H).  $^{13}\text{C}$  NMR (125.4 MHz,  $\text{CDCl}_3$ ):  $\delta$  162.3, 158.1, 139.1, 128.6, 127.5, 127.3, 110.9, 45.5. MS (EI):  $m/z$  (%) 186 (12), 185 (90), 184 (63), 157 (5), 144 (3), 129 (3), 108 (19), 106 (100), 91 (47), 79 (40), 77 (13), 65 (28). This compound was known.<sup>16</sup>

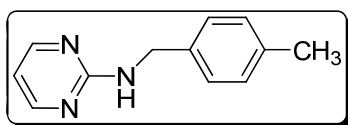

**N-(4-Methylbenzyl)-(2-pyrimidyl)amine (3bj).** White solid.  $^1\text{H}$  NMR (500 MHz,  $\text{CDCl}_3$ ):  $\delta$  8.24 (s, 2H), 7.25 (d,  $J = 8.0$  Hz, 2H), 7.14 (d,  $J = 7.9$  Hz, 2H), 6.53-6.51 (m, 1H), 5.68 (b, 1H), 4.59 (d,  $J = 5.8$  Hz, 2H), 2.33 (s, 3H).  $^{13}\text{C}$  NMR (125.4 MHz,  $\text{CDCl}_3$ ):  $\delta$  162.4, 158.1, 136.9, 136.0, 129.3, 127.5, 110.76, 45.3, 21.1. MS (EI):  $m/z$  (%) 199 (100), 198 (52), 184 (62), 120 (50), 105 (46), 106 (26), 79 (34), 80 (15), 65 (7), 53 (12). This compound was known.<sup>14</sup>

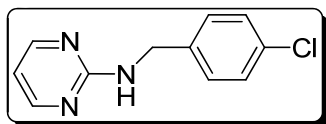

**N-(4-Chlorobenzyl)-(2-pyrimidyl)amine (3dj).** White solid.  $^1\text{H}$  NMR (500 MHz,  $\text{CDCl}_3$ ):  $\delta$  8.23 (d,  $J = 4.5$  Hz, 2H), 7.30-7.27 (m, 4H), 6.54 (t,  $J = 4.8$  Hz, 1H), 5.88 (b, 1H), 4.61 (d,  $J = 6.1$  Hz, 2H).  $^{13}\text{C}$  NMR (125.4 MHz,  $\text{CDCl}_3$ ):  $\delta$  162.3, 158.1, 137.8, 132.9, 128.8, 128.7, 111.0, 44.7. MS (EI):  $m/z$  (%) 221 (34), 220 (29), 219 (100), 184 (41), 142 (26), 141 (7), 140 (84), 125 (43), 108 (18), 89 (31), 80 (35), 63 (11), 53 (20). This compound was known.<sup>12</sup>

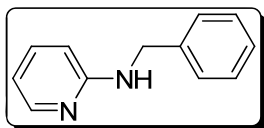

**N-Benzyl-(2-pyridyl)amine (3ak).** White solid.  $^1\text{H}$  NMR (500 MHz,  $\text{CDCl}_3$ ):  $\delta$  8.11 (d,  $J = 4.5$  Hz, 1H), 7.41-7.32 (m, 5H), 7.28-7.26 (m, 1H), 6.60-6.58 (m, 1H), 6.37 (d,  $J = 8.4$  Hz, 1H), 4.87 (b, 1H), 4.51 (d,  $J = 5.8$  Hz, 2H).  $^{13}\text{C}$  NMR (125.4 MHz,  $\text{CDCl}_3$ ):  $\delta$  158.7, 148.2, 139.2, 137.5, 128.6, 127.4, 127.2, 113.2, 106.8, 46.4. MS (EI):  $m/z$  (%) 184 (14), 183 (100), 153 (5), 127 (5), 116 (2), 106 (34), 79(11), 66 (4). This compound was known.<sup>16</sup>

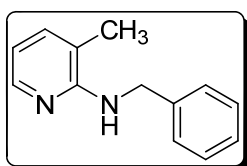

**N-Benzyl-[2-(3-methylpyridyl)]amine (3al).** White solid.  $^1\text{H}$  NMR (500 MHz,  $\text{CDCl}_3$ ):  $\delta$  8.04 (d,  $J = 4.9$  Hz, 1H), 7.39-7.32 (m, 4H), 7.28-7.22 (m, 2H), 6.55-6.53 (m, 1H), 4.68 (d,  $J = 5.3$  Hz, 2H), 4.36 (b, 1H), 2.07 (s, 1H).  $^{13}\text{C}$  NMR (125.4 MHz,  $\text{CDCl}_3$ ):  $\delta$  156.7, 145.5, 140.1, 136.9, 128.6, 127.9, 127.2, 116.5, 112.9, 45.8, 16.95. MS (EI):  $m/z$  (%) 198 (83), 197 (25), 181 (5), 121 (10), 106 (100), 91 (39), 79 (11), 65 (29). This compound was known.<sup>15</sup>

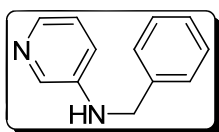

**N-Benzyl-(3-pyridyl)amine (3am).** Yellow solid.  $^1\text{H}$  NMR (500 MHz,  $\text{CDCl}_3$ ):  $\delta$  8.07 (d,  $J = 2.8$  Hz, 1H), 7.96 (d,  $J = 4.7$  Hz, 1H), 7.354-7.345 (m, 4H), 7.30-7.27 (m, 1H), 7.07-7.04 (m, 1H), 6.87-6.85 (m, 1H), 4.33 (d,  $J = 5.4$  Hz, 2H), 4.18 (b, 1H).  $^{13}\text{C}$  NMR (125.4 MHz,  $\text{CDCl}_3$ ):  $\delta$  144.0, 138.9, 138.5, 136.1, 128.8, 127.6, 127.4, 123.5, 118.7, 47.9. MS (EI):  $m/z$  (%) 184 (38), 183 (5), 92 (9), 91 (100), 78 (7), 77 (2), 65 (13), 51 (6). This compound was known.<sup>7</sup>

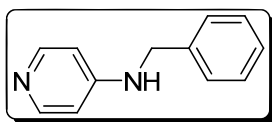

**N-Benzyl-(4-pyridyl)amine (3an).** White solid.  $^1\text{H}$  NMR (500 MHz,  $\text{CDCl}_3$ ):  $\delta$  8.19 (d,  $J = 6.1$  Hz, 2H), 7.38-7.29 (m, 5H), 6.47 (d,  $J = 6.2$  Hz, 2H), 4.73 (b, 1H), 4.37 (d,  $J = 5.3$  Hz, 2H).  $^{13}\text{C}$  NMR (125.4 MHz,  $\text{CDCl}_3$ ):  $\delta$  153.2, 150.0, 136.5, 133.4, 129.0, 128.5, 107.8, 46.2. MS (EI):  $m/z$  (%) 185 (5), 184 (40), 154(0.7), 128 (1), 107 (7), 105 (6), 92 (8), 91 (100), 78 (11), 65 (16), 51 (12). This compound was known.<sup>17</sup>

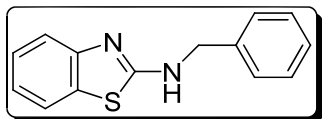

**N-Benzylbenzo[d]thiazol-2-amine (3ao).** White solid.  $^1\text{H}$  NMR (500 MHz,  $\text{CDCl}_3$ ):  $\delta$  7.58 (d,  $J = 7.8$  Hz, 1H), 7.53 (d,  $J = 8.1$  Hz, 1H), 7.40-7.35 (m, 4H), 7.32-7.28 (m, 2H), 7.11-7.07 (m, 1H), 5.72 (b, 1H), 4.65 (s, 2H).  $^{13}\text{C}$  NMR (125.4 MHz,  $\text{CDCl}_3$ ):  $\delta$  167.2, 152.4, 137.5, 130.6, 128.9, 127.9, 127.7, 126.0, 121.8, 120.8, 119.2, 49.4. MS (EI):  $m/z$  (%) 242 (3) 241 (8), 240 (46), 239 (25), 212 (4), 163 (3), 136 (15), 106 (27), 92 (8), 91 (100), 65 (25), 51 (4). This compound was known.<sup>8</sup>

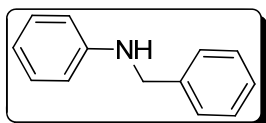

**N-Benzylaniline (3ap).** Colorless oil.  $^1\text{H}$  NMR (500 MHz,  $\text{CDCl}_3$ ):  $\delta$  7.38-7.32 (m, 4H), 7.28-7.26 (m, 1H), 7.19-7.16 (m, 2H), 6.73-6.70 (m, 1H), 6.65-6.63 (m, 2H), 4.33 (s, 2H), 4.04 (b, 1H).  $^{13}\text{C}$  NMR (125.4 MHz,  $\text{CDCl}_3$ ):  $\delta$  148.1, 139.4, 129.3, 128.6, 127.5, 127.2, 117.6, 112.9, 48.4. MS (EI):  $m/z$  (%) 183 (56), 182 (21), 106 (22), 104 (11), 92 (9), 91 (100), 77 (18), 65 (15), 51 (7). This compound was known.<sup>17</sup>

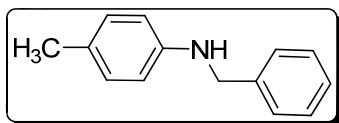

**N-Benzyl-4-methylaniline (3aq).** Brown oil.  $^1\text{H}$  NMR (500 MHz,  $\text{CDCl}_3$ ):  $\delta$  7.47-7.37 (m, 5H), 7.10-7.08 (m, 2H), 6.67-6.65 (m, 2H), 4.39 (s, 2H), 3.97 (b, 1H), 2.35 (s, 3H).  $^{13}\text{C}$  NMR (125.4 MHz,  $\text{CDCl}_3$ ):  $\delta$  146.1, 139.8, 129.9, 128.7, 127.6, 127.3, 126.8, 113.1, 48.7, 20.5. MS (EI):  $m/z$  (%) 197 (66), 196 (26), 120 (26), 106 (5), 92 (9), 91 (100), 89 (3), 79 (4), 78 (3), 65 (14), 51 (3). This compound was known.<sup>17</sup>

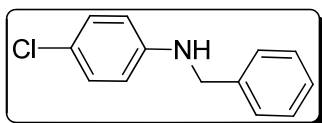

**N-Benzyl-4-chloroaniline (3ar).** White solid.  $^1\text{H}$  NMR (500 MHz,  $\text{CDCl}_3$ ):  $\delta$  7.40-7.30 (m, 5H), 7.14 (d,  $J = 8.4$  Hz, 2H), 6.58-6.55 (m, 2H), 4.32 (s, 2H), 4.08 (b, 1H).  $^{13}\text{C}$  NMR (125 MHz,  $\text{CDCl}_3$ ):  $\delta$  146.6, 138.9, 129.0, 128.7, 127.4, 127.1, 113.9, 48.3. MS (EI):  $m/z$  (%) 218 (8), 217 (39), 216 (7), 111 (5), 92 (8), 91 (100), 75 (4), 65 (11), 51 (3). This compound was known.<sup>17</sup>

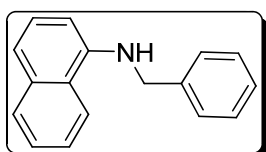

**N-Benzyl-naphthalen-1-amine (3as).** White solid.  $^1\text{H}$  NMR (500 MHz,  $\text{CDCl}_3$ ):  $\delta$  7.84-7.80 (m, 2H), 7.47-7.30 (m, 9H), 6.64 (d,  $J = 7.5$  Hz, 1H), 4.71 (b, 1H), 4.51 (s, 2H).  $^{13}\text{C}$  NMR (125 MHz,  $\text{CDCl}_3$ ):  $\delta$  143.2, 139.1, 134.3, 128.73, 128.71, 127.7, 127.4, 126.6, 125.7, 124.8, 123.4, 119.9, 117.6, 104.8, 48.6. MS (EI):  $m/z$  (%) 234 (20), 233(98), 232 (23), 154 (5), 142 (24), 127 (11), 115 (41), 101 (2), 91 (100), 77 (5), 65 (11), 51 (2). This compound was known.<sup>18</sup>

## References

1. Shi, F.; Tse, M. K.; Zhou, S. L.; Pohl, M. M.; Radnik, J.; Hunber, S.; Jahnisch, K.; Brukner, A.; Beller, M. *J. Am. Chem. Soc.* **2009**, *131*, 1775.
2. Takahashi, M.; Morimoto, T.; Isogai, K.; Tsuchiya, S.; Mizumoto, K. *Heterocycles*, **2001**, *55*, 1759.
3. Hamid, M. H. S. A.; Allen, C. L.; Lamb, G. W.; Maxwell, A. C.; Maytum, H. C.; Watson, A. J. A.; Williams, J. M. J. *J. Am. Chem. Soc.* **2009**, *131*, 1766.
4. Wilden, J. D.; Geldeard, L.; Lee C. C.; Juddb, D. B.; Caddick, S. *Chem. Commun.* **2007**, 1074.
5. Kremlev, M. M.; Boiko, S. A.; Rovinskii, M. S.; Kandabarova, S. S. *Russ. J. Org. Chem.* **1971**, *7*, 1700.
6. Sreedhar, B.; Reddy, P. S.; Reddy, M. A.; Neelima, B.; Arundhathi, R. *Tetrahedron Lett.* **2007**, *48*, 8174.
7. Liu, C.; Liao S.; Li, Q.; Feng, S.; Sun, Q.; Yu, X.; Xu, Q. *J. Org. Chem.* **2011**, *76*, 5759.
8. Choi, J. H.; Lee, B. C.; Lee, H. W.; Lee, I. *J. Org. Chem.* **2002**, *67*, 1277.
9. Hallet, Peter. (Glaxo Group Ltd., UK). Eur. Pat. Appl. **1987**.
10. Kilpin, K. J.; Henderson, W.; Nicholson, B. K. *Dalton Trans.* **2008**, 3899.
11. Martinez-Asencio, A.; Ramon, D. J.; Yus, M. *Tetrahedron.* **2011**, *67*, 3140.
12. Paio, A.; Zaramella, A.; Ferritto, R.; Conti, N.; Marchioro, C.; Seneci. *P. J. Comb. Chem.* **1999**, *1*, 317.
13. Kaye, I. A.; Kogon, I. C. *J. Am. Chem. Soc.* **1951**, *73*, 5891.
14. Park, Y. J.; Jo, E.-A.; Jun, C.-H. *Chem. Commun.* **2005**, 1185.
15. Blank, B.; Madalska, M.; Kempe, R. *Adv. Synth. Catal.* **2008**, *350*, 749.
16. Cui, X. J.; Zhang, Y.; Shi, F.; Deng, Y. *Chem. Eur. J.* **2010**, *17*, 1021.
17. Li, F.; Shan, H. X.; Kang, Q. K.; Chen, L. *Chem. Commun.* **2011**, *47*, 5058.
18. Kim, J. W.; Yamaguchi, K.; Mizuno, N. *J. Catal.* **2009**, *263*, 205.

## Elementary Reactions and Mechanistic Studies

**Table S6.** Cu-Mediated Alcohol Oxidation.

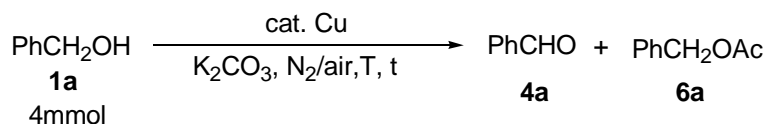

| Run | Cu (mol%)                                   | K <sub>2</sub> CO <sub>3</sub> (mol%) | condition                            | <b>4a</b> % <sup>[a]</sup> | <b>6a</b> % <sup>[a]</sup> |
|-----|---------------------------------------------|---------------------------------------|--------------------------------------|----------------------------|----------------------------|
| 1   | Cu(OAc) <sub>2</sub> ·H <sub>2</sub> O (5)  | -                                     | N <sub>2</sub> , 120 °C, 6 h         | NR                         |                            |
| 2   | Cu(OAc) <sub>2</sub> ·H <sub>2</sub> O (5)  | 50                                    | N <sub>2</sub> , 120 °C, 12 h        | NR                         |                            |
| 3   | Cu(OAc) <sub>2</sub> ·H <sub>2</sub> O (5)  | -                                     | air, 120 °C, 6 h                     | 2.8                        |                            |
| 4   | Cu(OAc) <sub>2</sub> ·H <sub>2</sub> O (5)  | 50                                    | air, 120 °C, 6 h<br>12 h             | 4.4<br>5.8                 |                            |
| 5   | Cu(OAc) <sub>2</sub> ·H <sub>2</sub> O (5)  | -                                     | N <sub>2</sub> , 150 °C, 6 h<br>12 h | 2.3<br>2.4                 | 13                         |
| 6   | Cu(OAc) <sub>2</sub> ·H <sub>2</sub> O (5)  | -                                     | N <sub>2</sub> , 180 °C, 6 h<br>12 h | 2.8<br>2.7                 | 10                         |
| 7   | Cu(OAc) <sub>2</sub> ·H <sub>2</sub> O (10) | -                                     | N <sub>2</sub> , 150 °C, 6 h<br>12 h | 5<br>4 (4)                 | 17<br>18 (13)              |
| 8   | Cu(OAc) <sub>2</sub> ·H <sub>2</sub> O (20) | -                                     | N <sub>2</sub> , 150 °C, 6 h<br>12 h | 5.4<br>5.5 (8)             | 33<br>39 (33)              |
| 9   | CuI (10)                                    | -                                     | N <sub>2</sub> , 150 °C, 6 h         | NR                         |                            |
| 10  | CuI (20)                                    | -                                     | N <sub>2</sub> , 150 °C, 6 h         | NR                         |                            |
| 11  | CuI (50)                                    | -                                     | N <sub>2</sub> , 150 °C, 6 h         | NR                         |                            |

[a] Absolute **1a** was used. GC yield (NMR yield in parenthesis).

**Table S7.** Cu-Promoted Condensation of Sulfonamides with Aldehydes.<sup>[a]</sup>

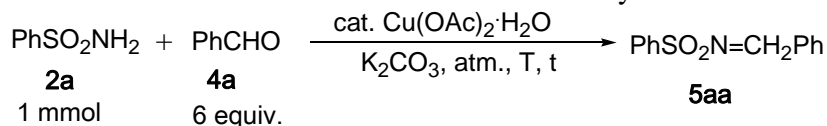

| run | [Cu] (mol%) | K <sub>2</sub> CO <sub>3</sub> (mol%) | condition                    | <b>5aa</b> yield (%) <sup>[b]</sup> |
|-----|-------------|---------------------------------------|------------------------------|-------------------------------------|
| 1   | -           | -                                     | N <sub>2</sub> , 120 °C, 8 h | 65                                  |
| 2   | 5           | -                                     | N <sub>2</sub> , 120 °C, 4 h | 95                                  |
| 3   | 5           | -                                     | air, 120 °C, 4 h<br>8 h      | 87<br>96                            |
| 4   | -           | 100                                   | N <sub>2</sub> , 120 °C, 8 h | 78                                  |
| 5   | -           | 100                                   | air, 120 °C, 4 h<br>8 h      | 84<br>93                            |

[a] Newly distilled **4a** was used. [b] GC yield based on **2a**.

**Table S8.** Cu-Catalyzed Transfer Hydrogenation.

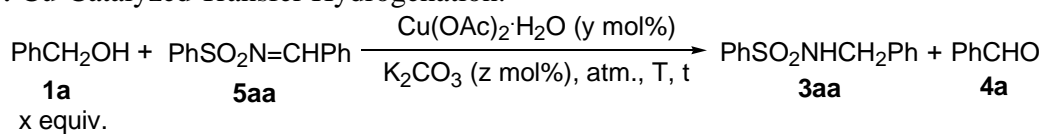

| Run              | x, y, z    | condition                    | 3aa yield (%) | 4a yield (%) | 4a/3aa <sup>[c]</sup> |
|------------------|------------|------------------------------|---------------|--------------|-----------------------|
| 1 <sup>[a]</sup> | 6, 0, 0    | N <sub>2</sub> , 120 °C, 8 h | -             | -            | -                     |
| 2 <sup>[a]</sup> | 6, 5, 0    | N <sub>2</sub> , 120 °C, 2 h | 26            | 49           | -                     |
| 3 <sup>[a]</sup> | 6, 5, 100  | N <sub>2</sub> , 120 °C, 2 h | 95            | 32           | -                     |
| 4 <sup>[a]</sup> | 6, 5, 100  | air, 120 °C, 2 h             | 58            | 87           | -                     |
| 5 <sup>[a]</sup> | 1.3, 1, 20 | N <sub>2</sub> , 100 °C, 8 h | 93            | 52           | -                     |
| 6 <sup>[b]</sup> | 1.3, 1, 20 | N <sub>2</sub> , 100 °C, 4 h | 69            | 69           | 1.00/1.00             |
|                  |            | 6 h                          | 83            | 70           | 0.84/1.00             |

[a] Detected by GC. [b] Detected by NMR. [c] mol/mol by NMR.

(1) Table S7, Run 6, 100 °C, 4 h:

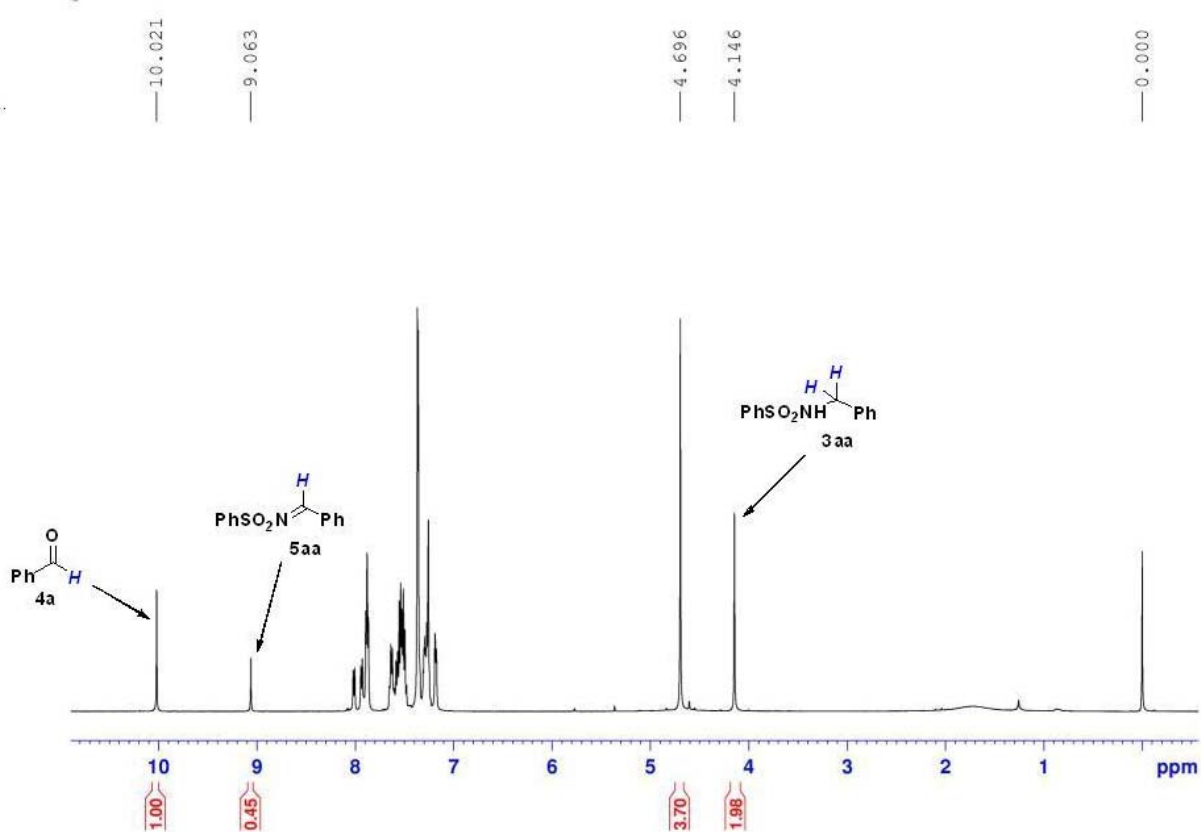

$$3\mathbf{aa}\% = (1.98/2)/(1.98/2+0.45)\% = 69\%$$

$$4\mathbf{a}\% = 1.00 / (1.98/2+0.45)\% = 69\%$$

$$4\mathbf{a}/3\mathbf{aa} \text{ (mol/mol)} = 69/69 = 1.00/1.00$$



(2) Table S7, Run 6, 100°C, 6 h:

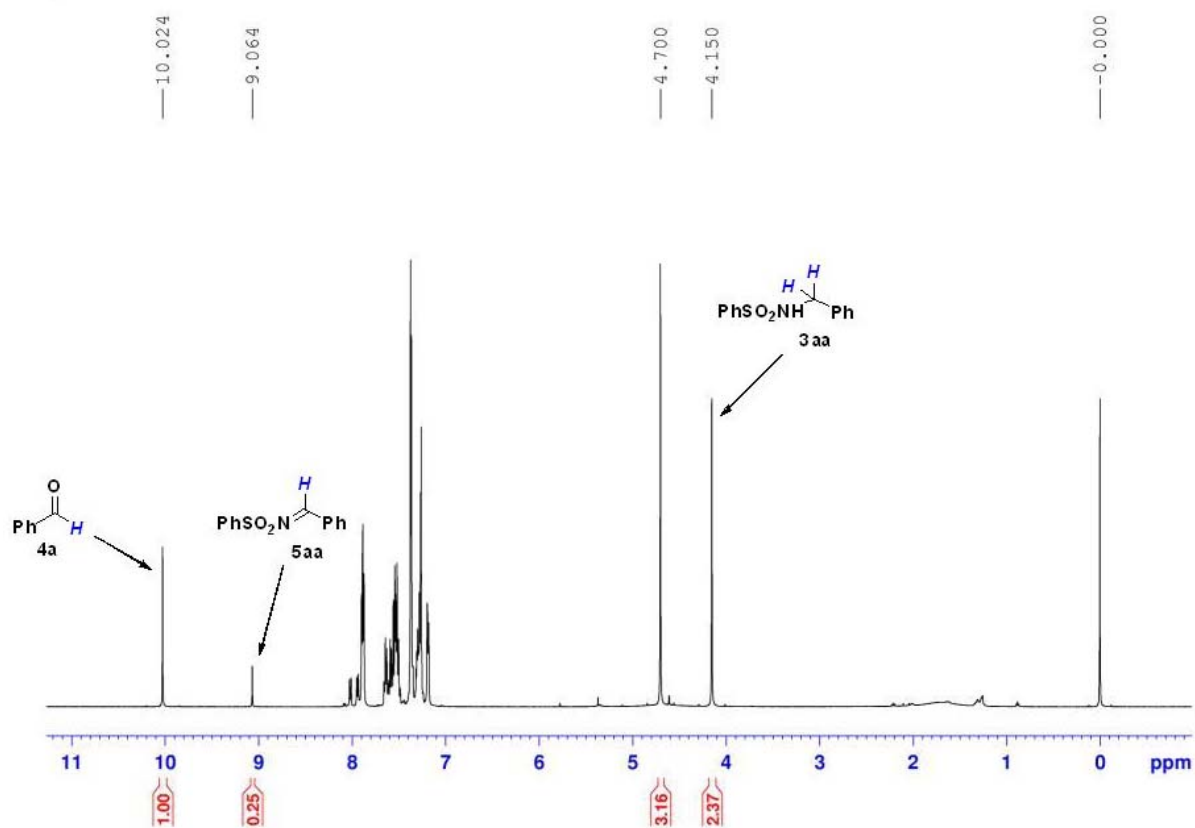

$$3\mathbf{aa}\% = (2.37/2)/(2.37/2+0.25)\% = 83\%$$

$$4\mathbf{a}\% = 1.00 / (2.37/2+0.25)\% = 70\%$$

$$4\mathbf{a}/3\mathbf{aa} \text{ (mol/mol)} = 70/83 = 0.84/1.00$$

### $^1\text{H}$ and $^{13}\text{C}$ NMR Spectra of the Products

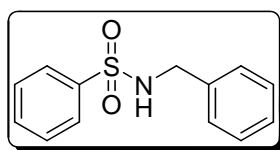

**3aa**

#### $^1\text{H}$ NMR

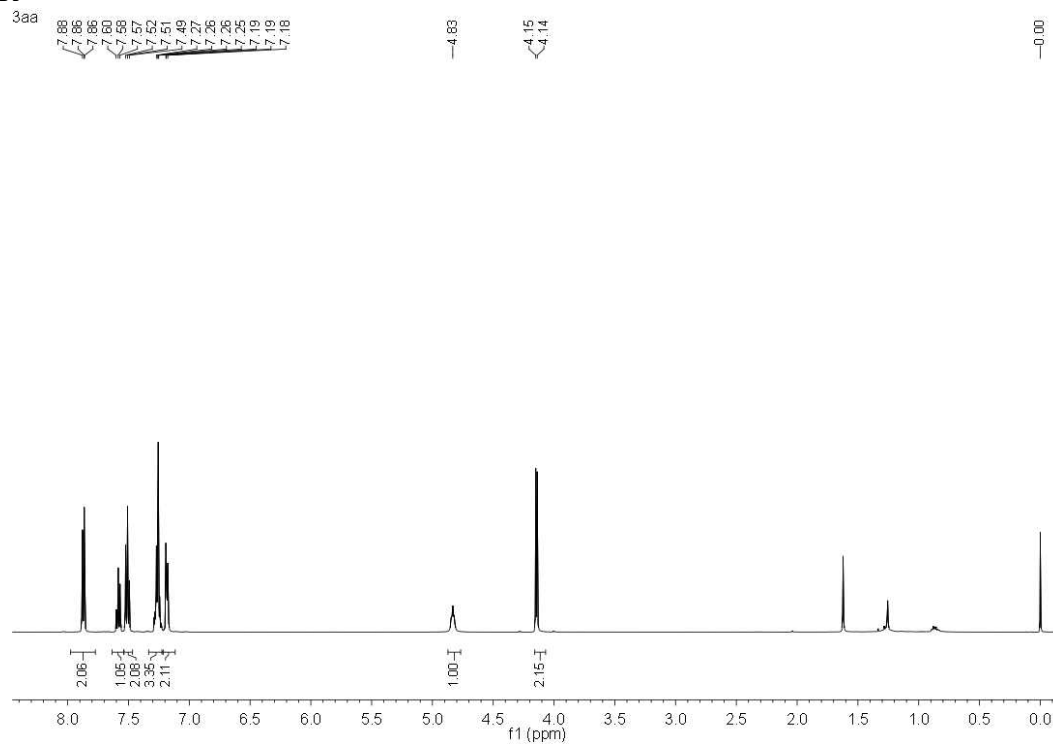

#### $^{13}\text{C}$ NMR

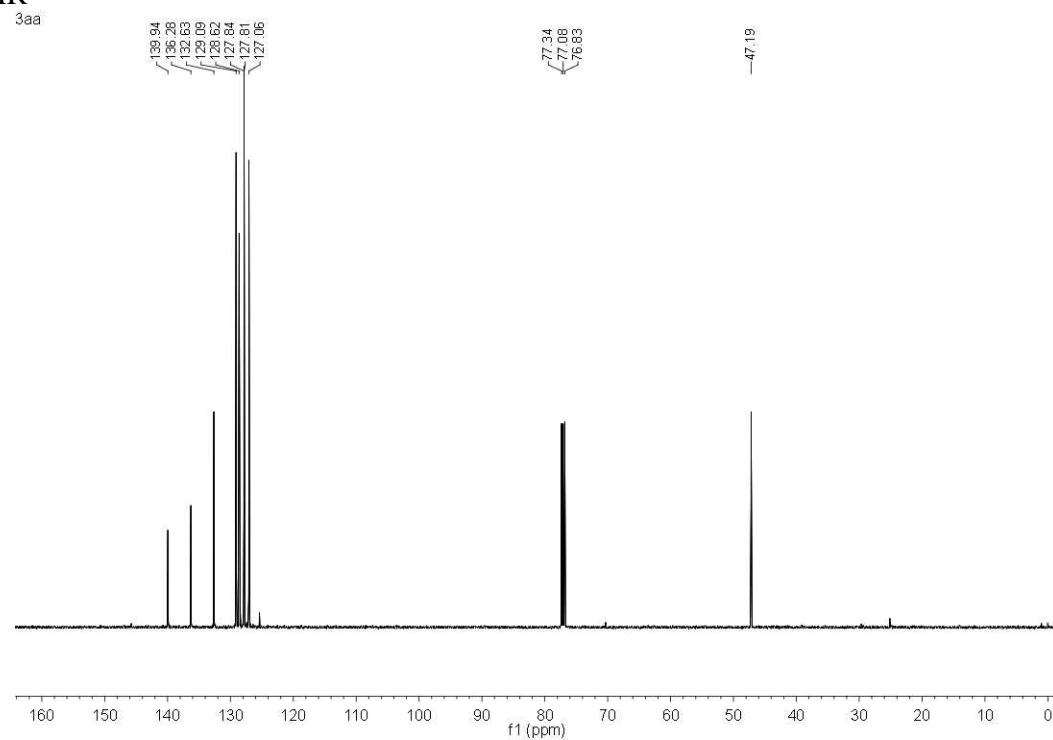

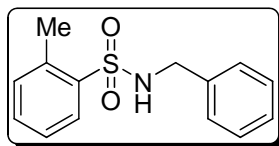

**3ab**

<sup>1</sup>H NMR

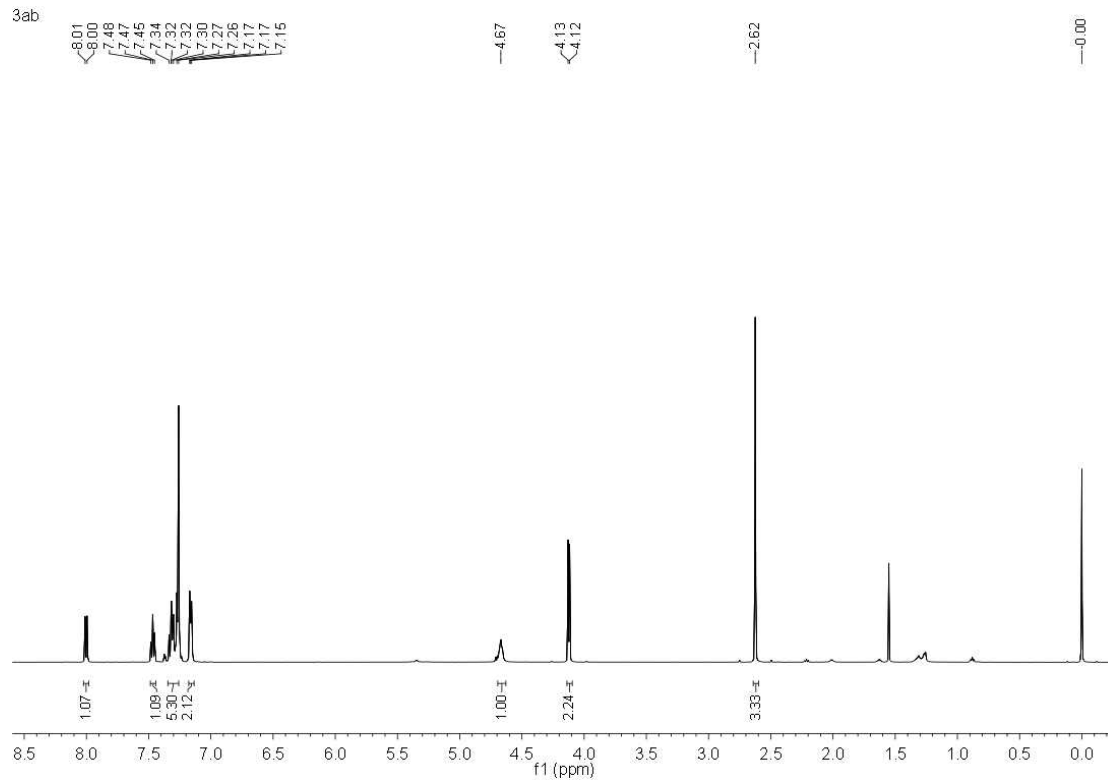

<sup>13</sup>C NMR

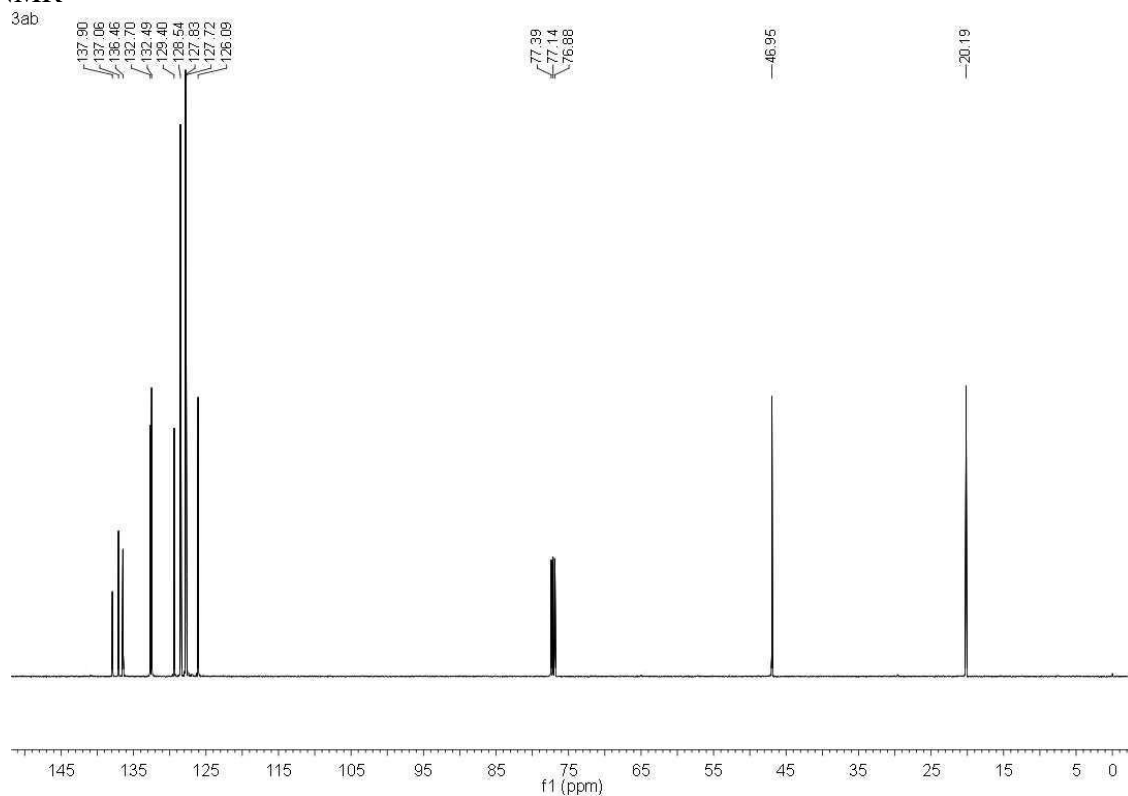

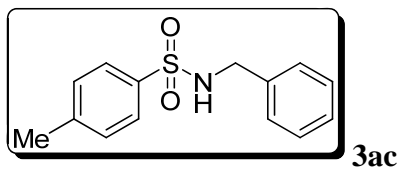

<sup>1</sup>H NMR  
3ac

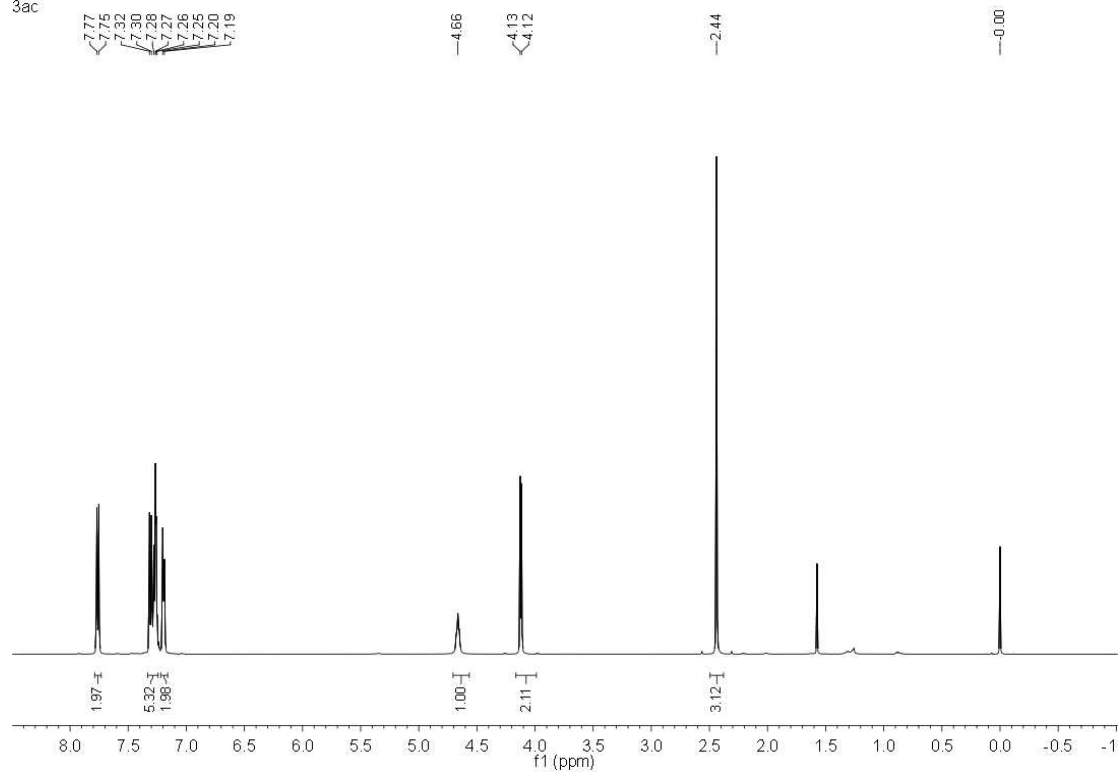

<sup>13</sup>C NMR  
3ac

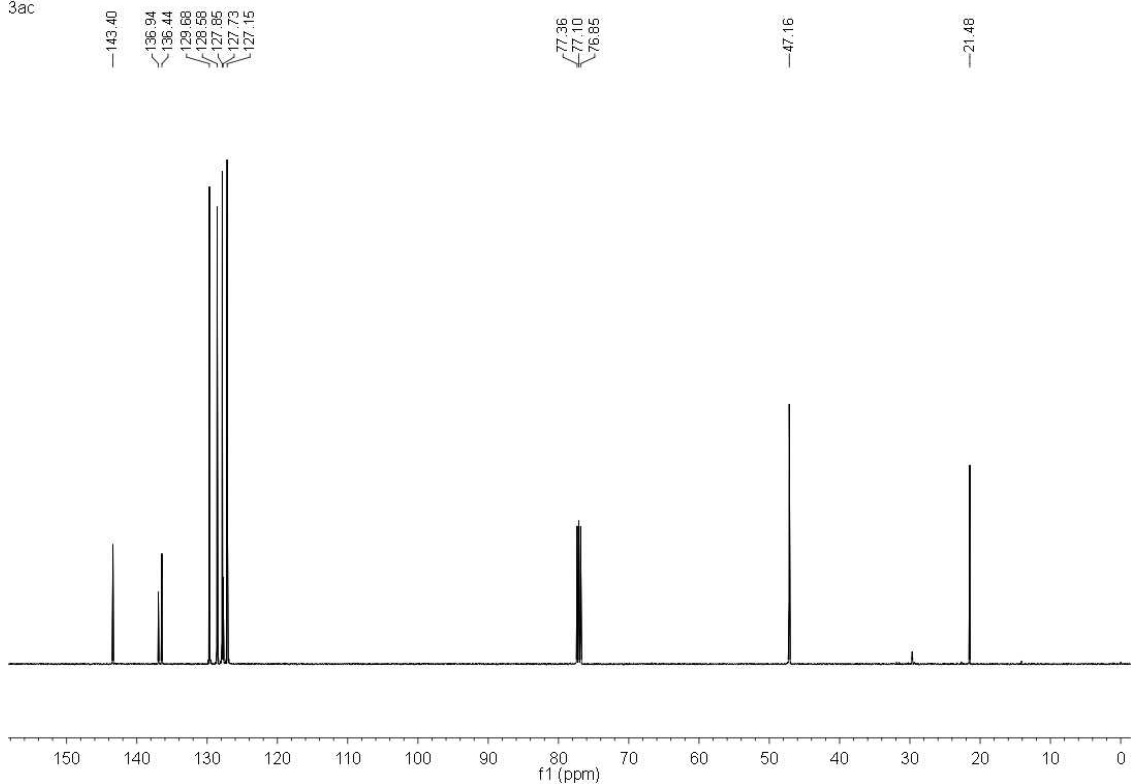

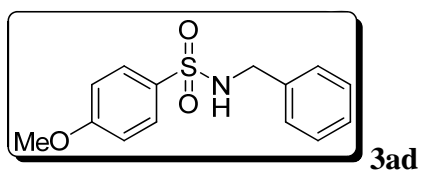

<sup>1</sup>H NMR  
3ad

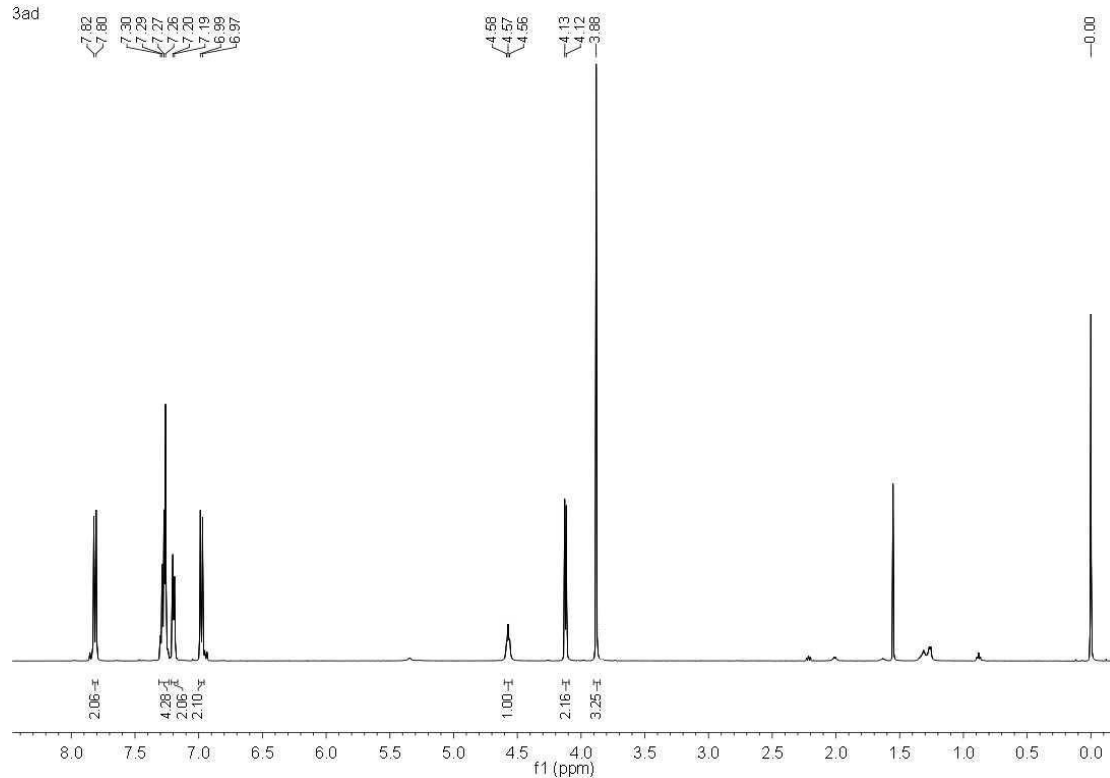

<sup>13</sup>C NMR  
3ad

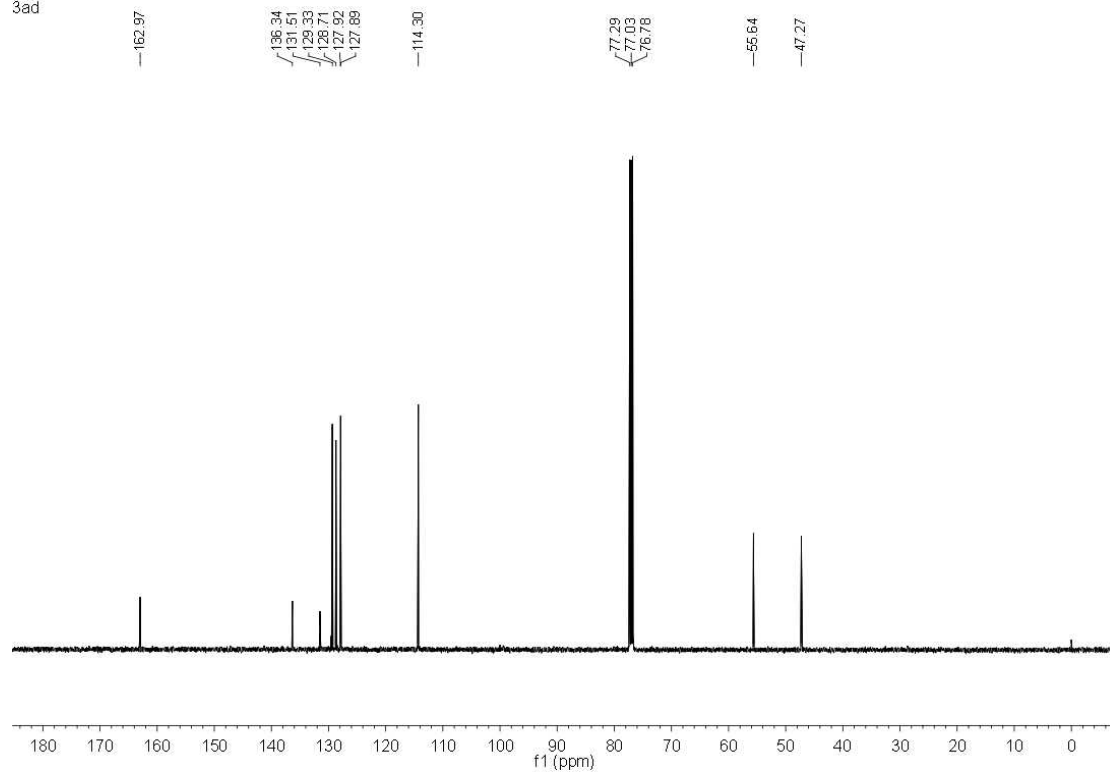

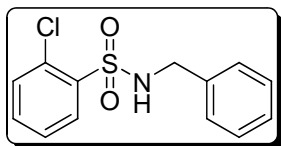

**3ae**

<sup>1</sup>H NMR

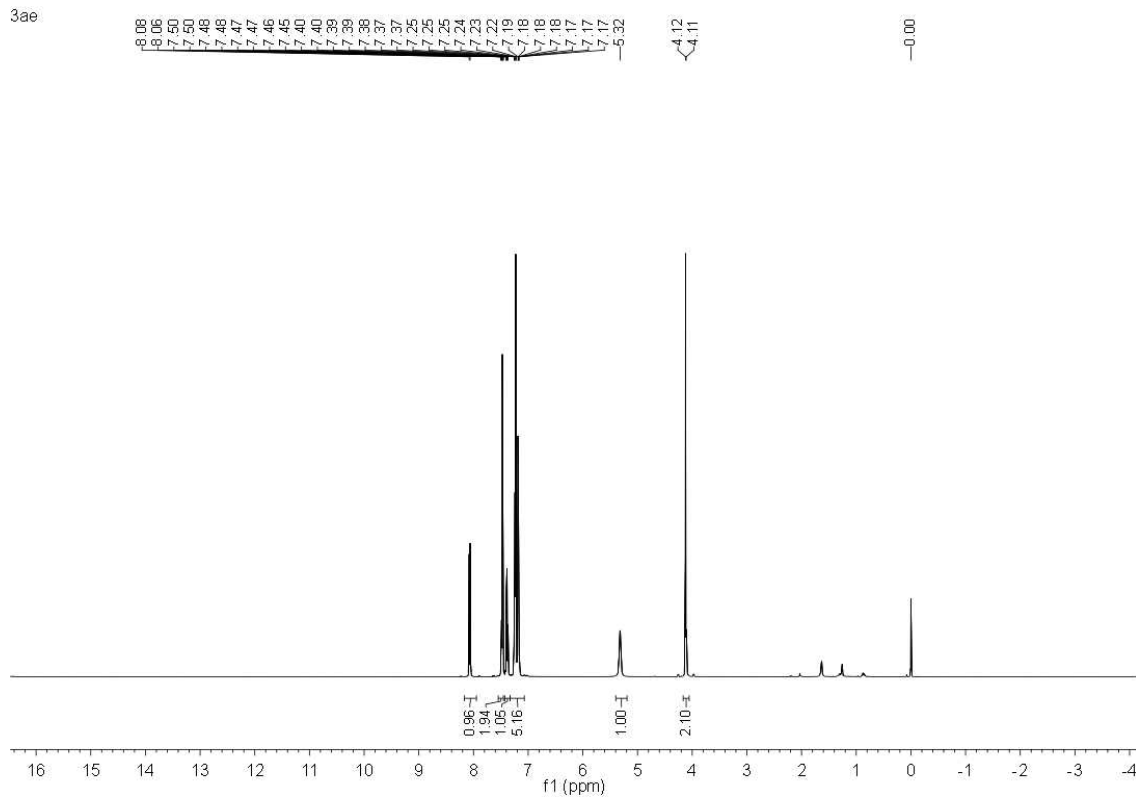

<sup>13</sup>C NMR

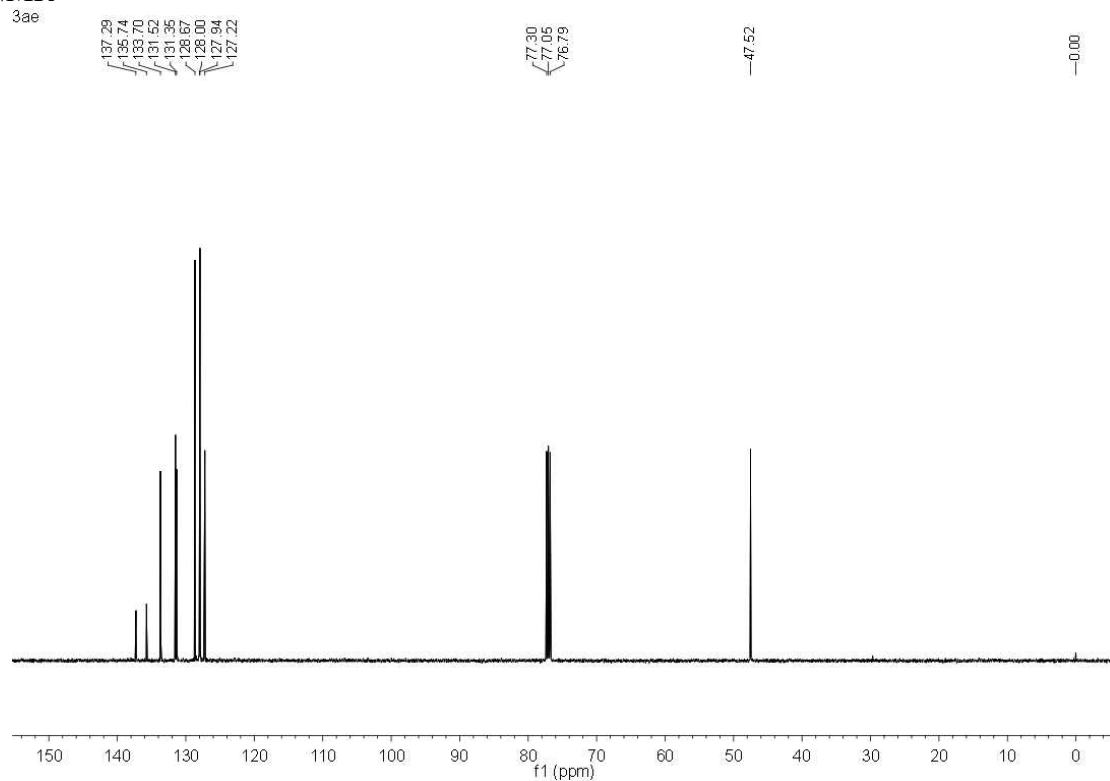

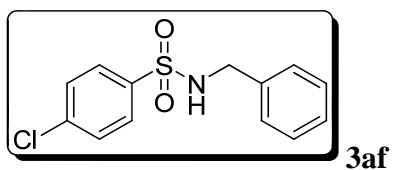

<sup>1</sup>H NMR  
3af

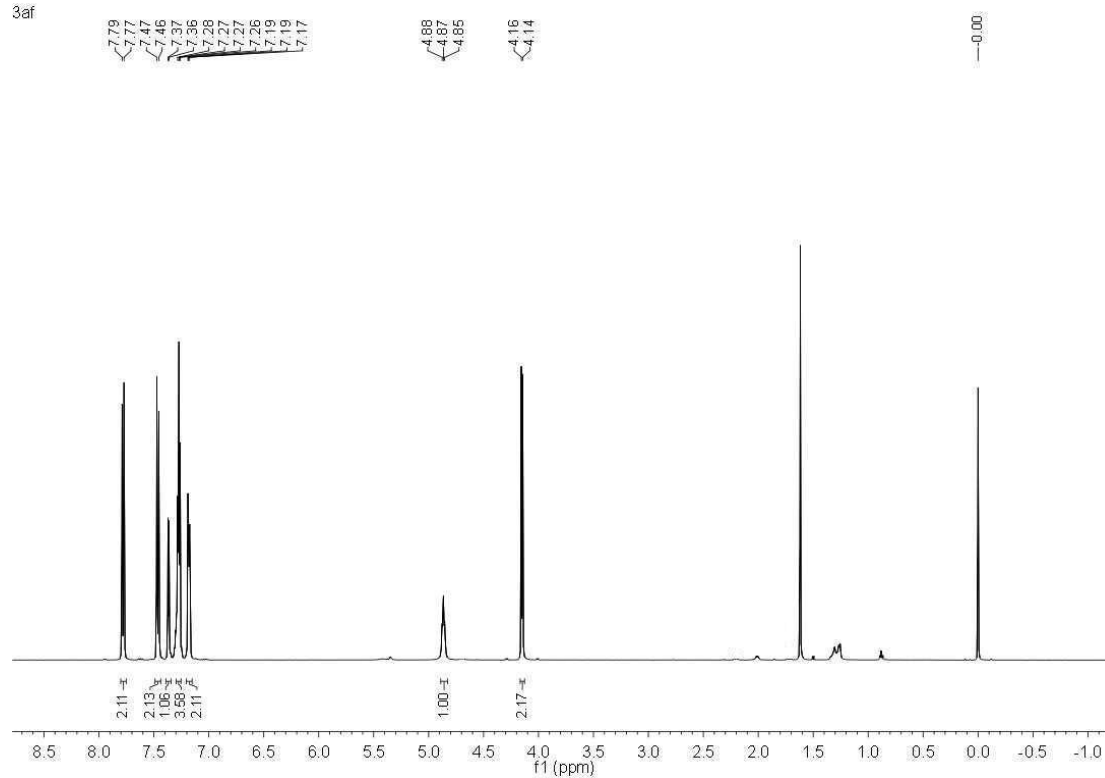

<sup>13</sup>C NMR  
3af

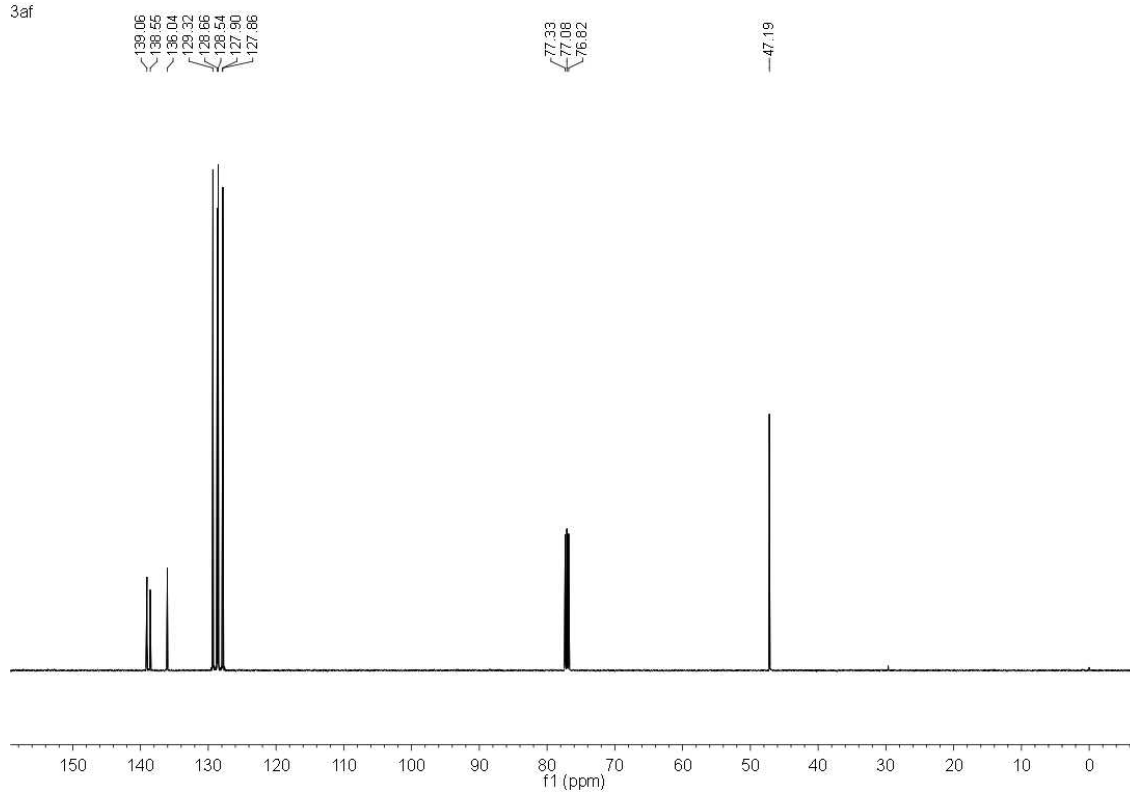

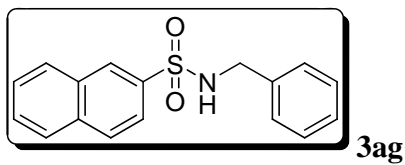

<sup>1</sup>H NMR  
3ag

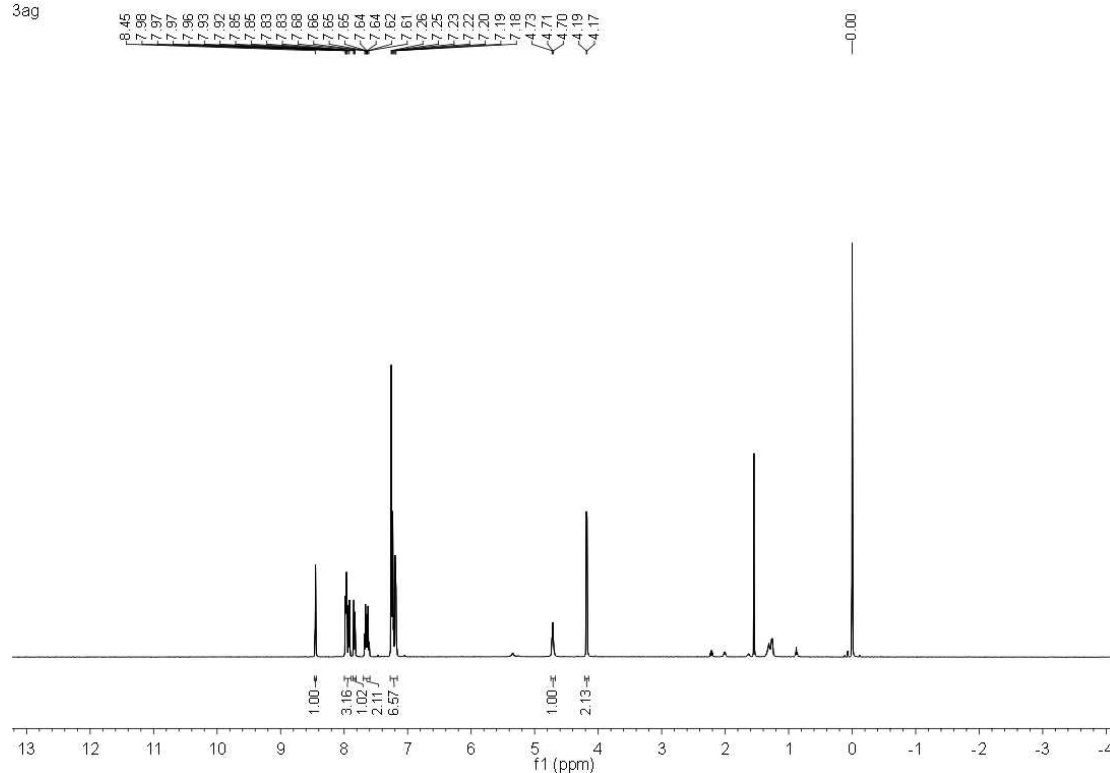

<sup>13</sup>C NMR  
3ag

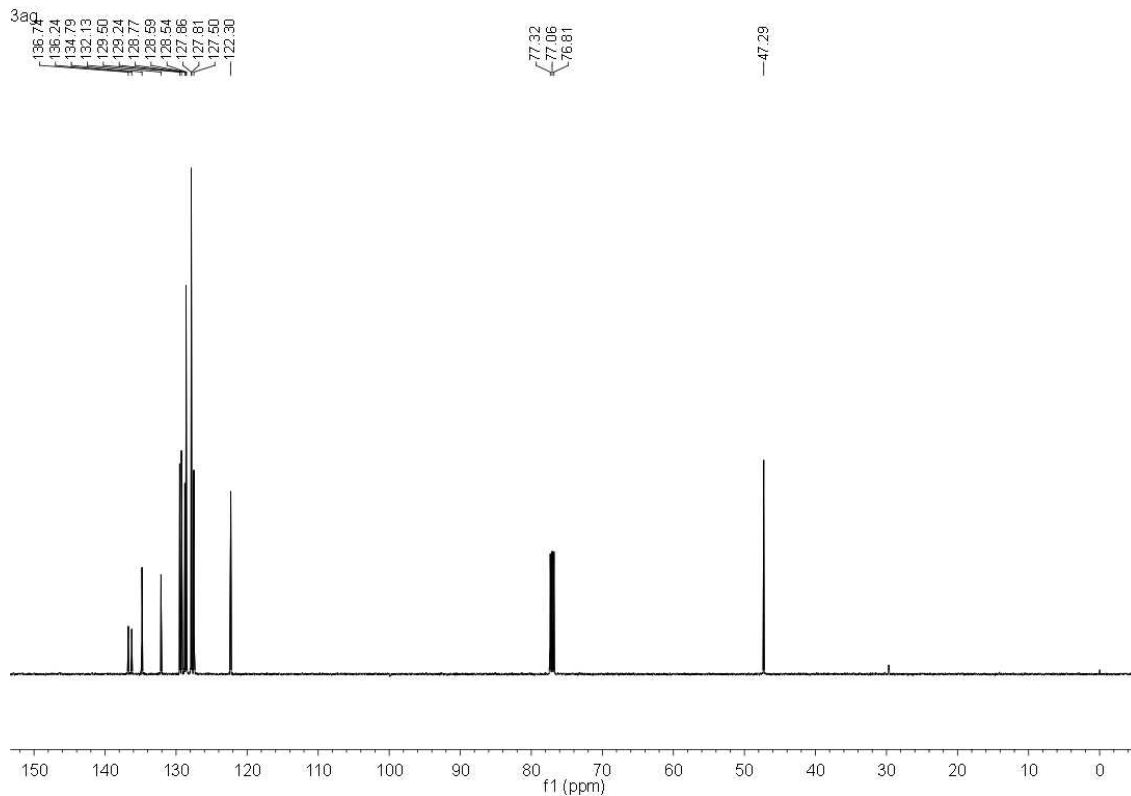



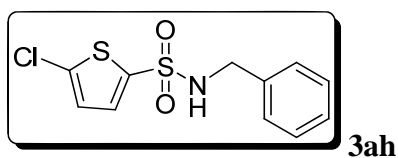

<sup>1</sup>H NMR  
3ah

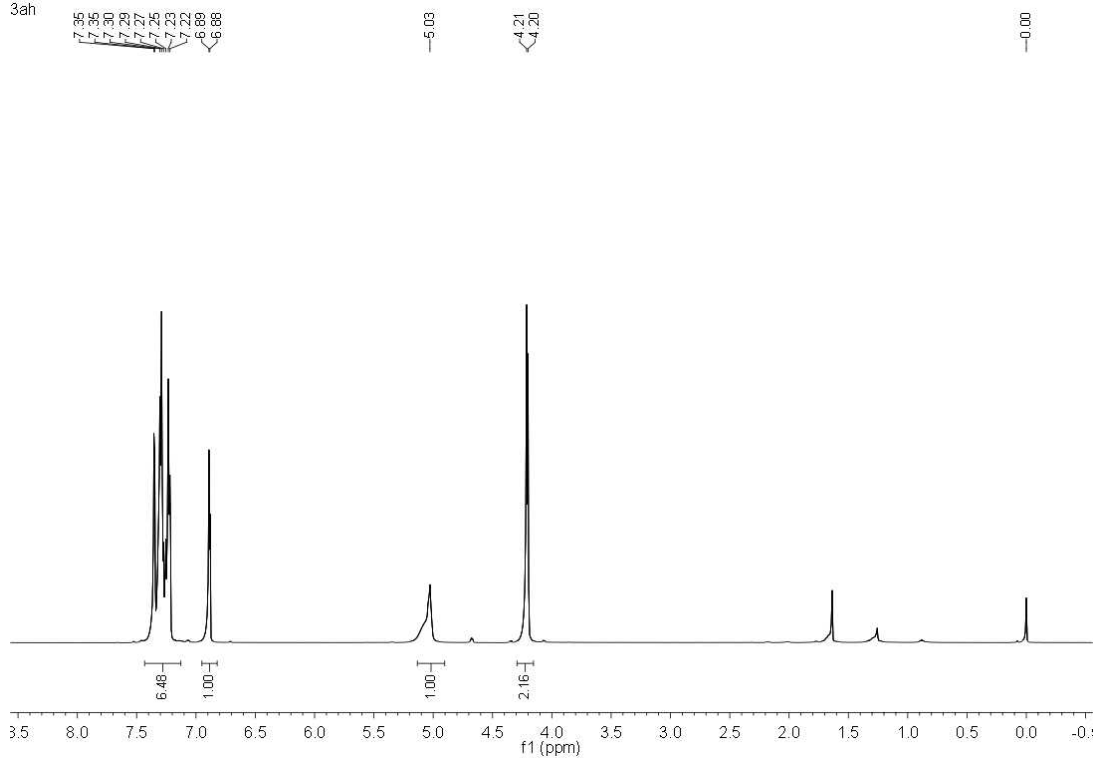

<sup>13</sup>C NMR  
3ah

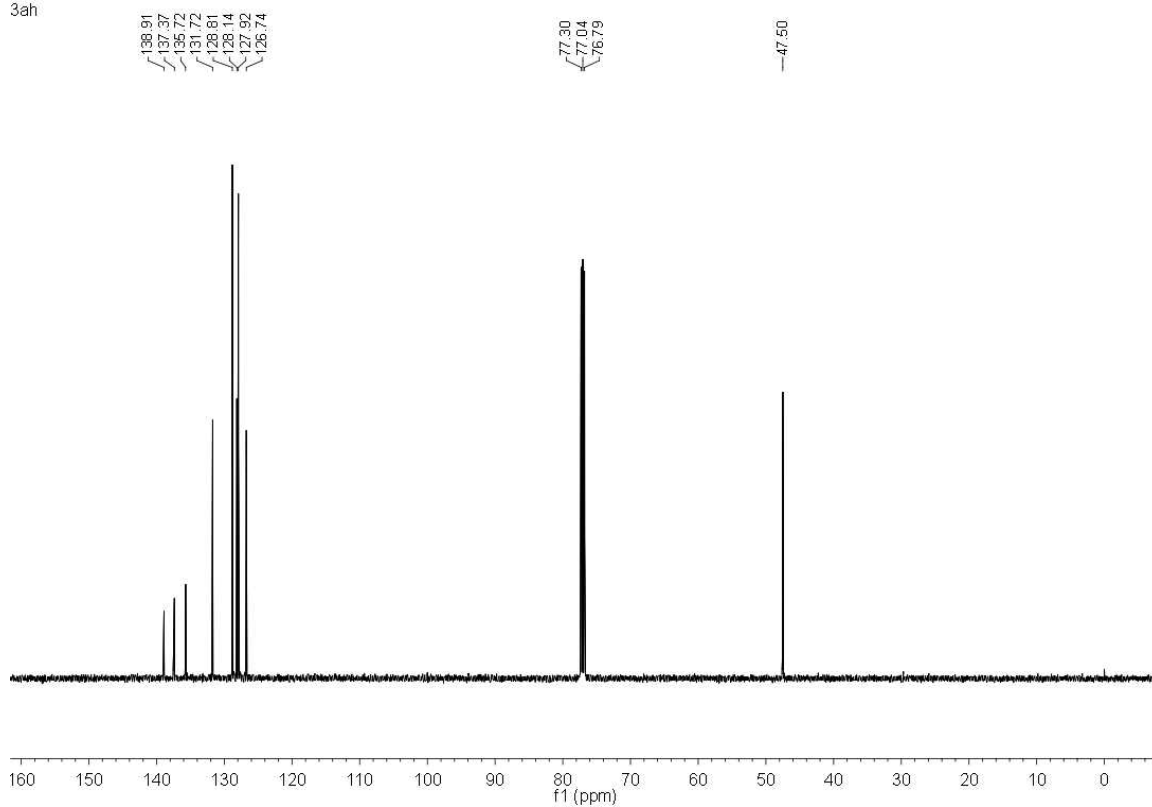

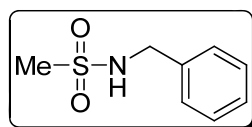

**3ai**

<sup>1</sup>H NMR

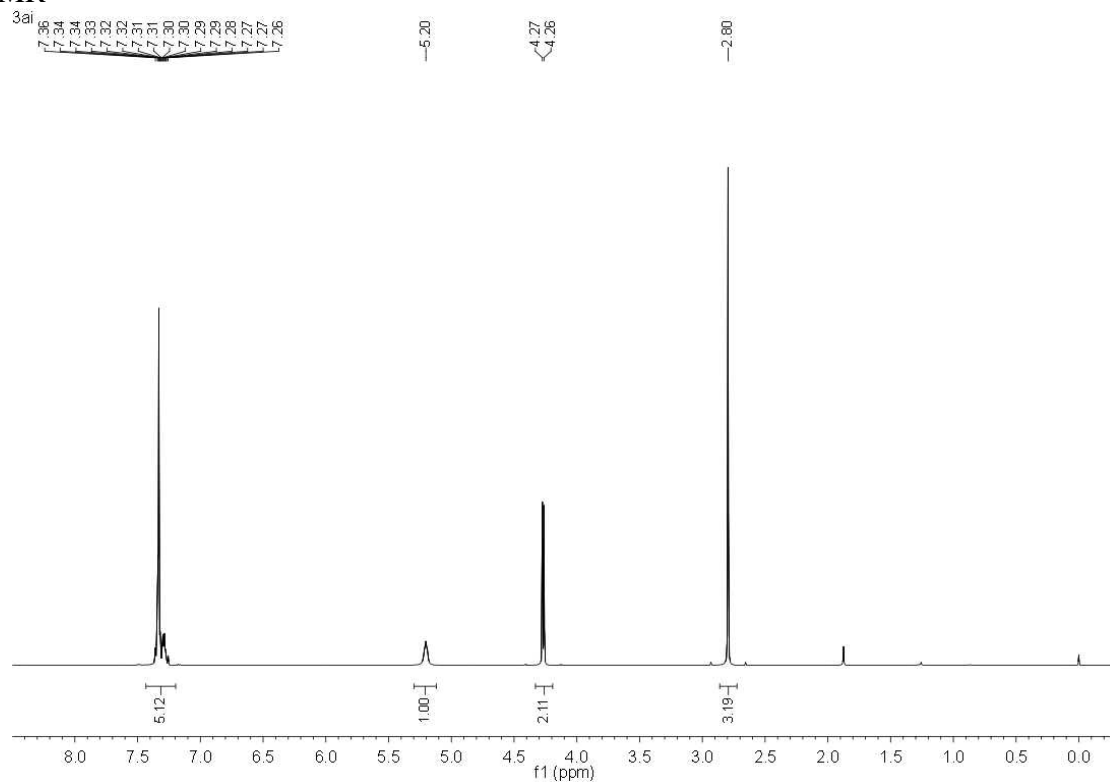

<sup>13</sup>C NMR

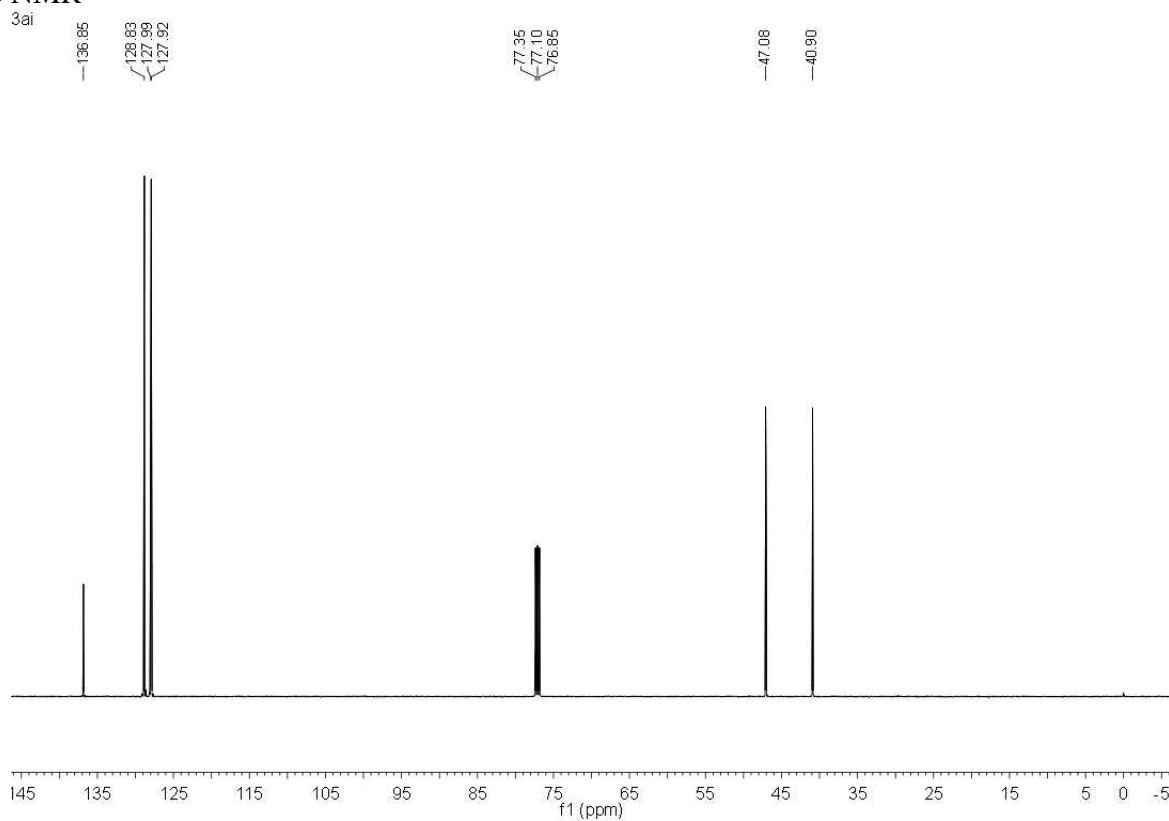

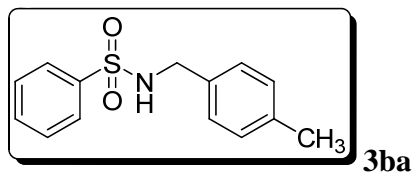

<sup>1</sup>H NMR  
3ba

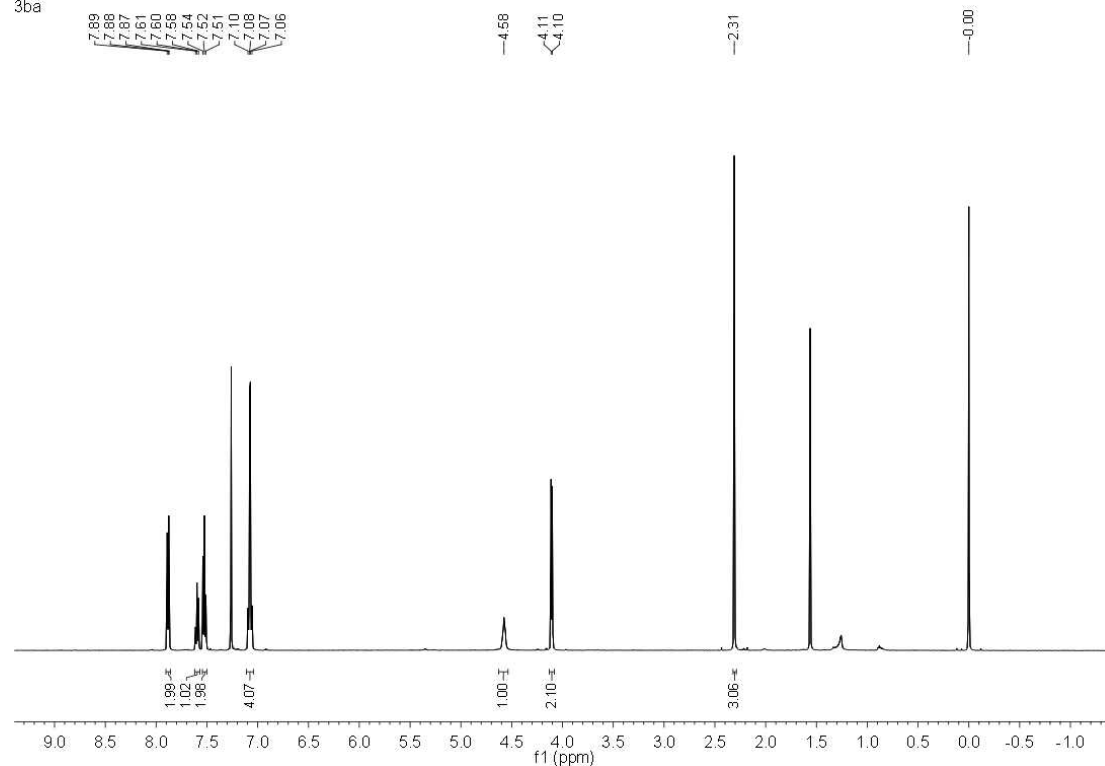

<sup>13</sup>C NMR  
3ba

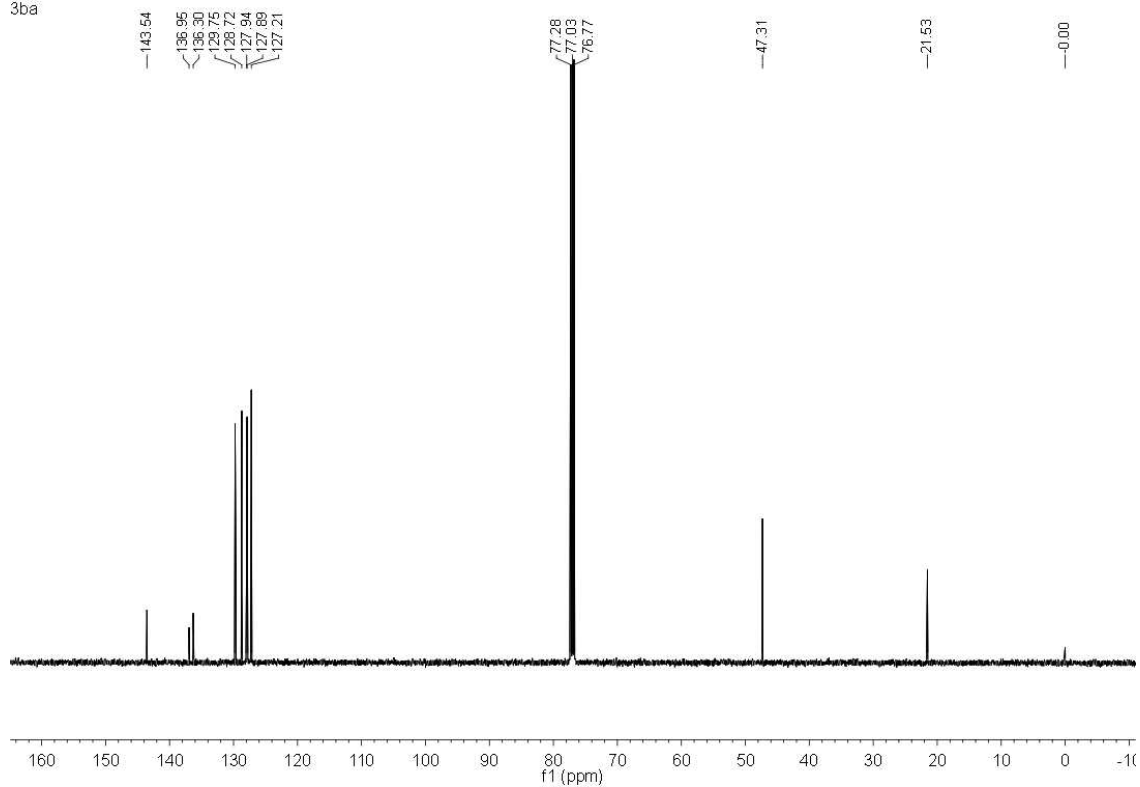

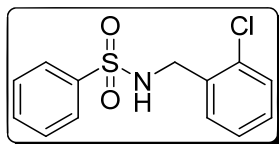

**3ca**

<sup>1</sup>H NMR

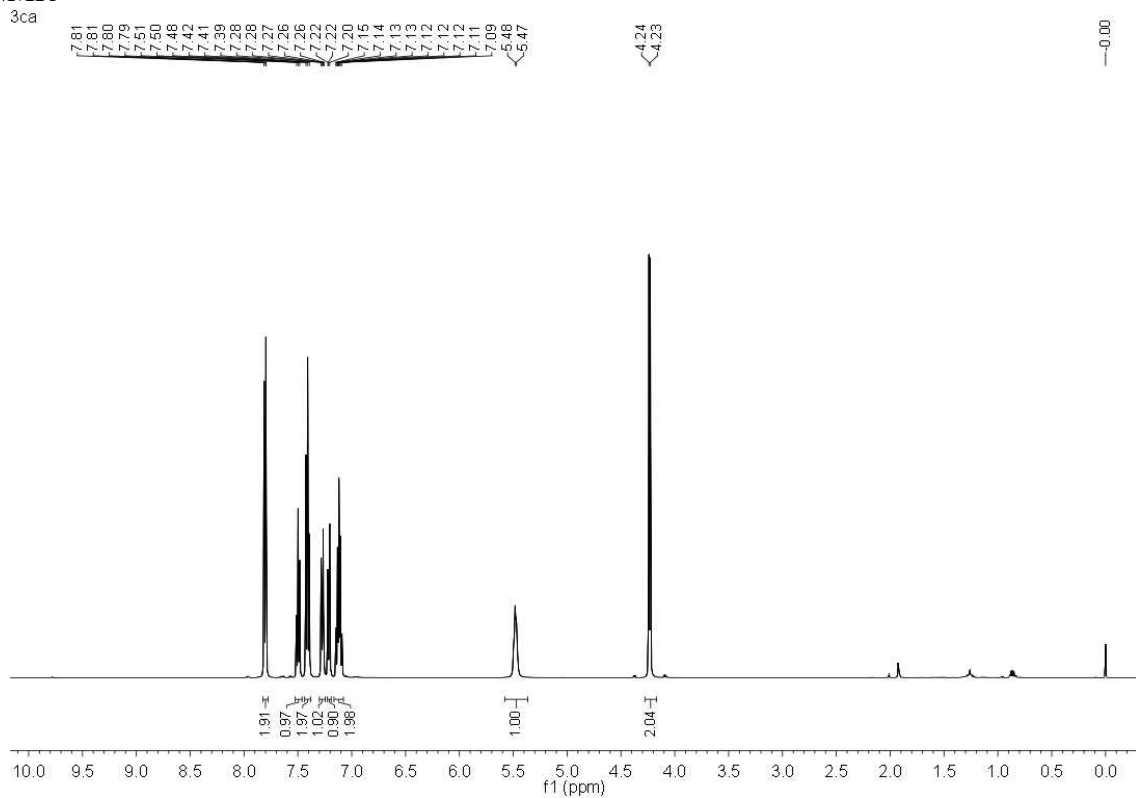

<sup>13</sup>C NMR

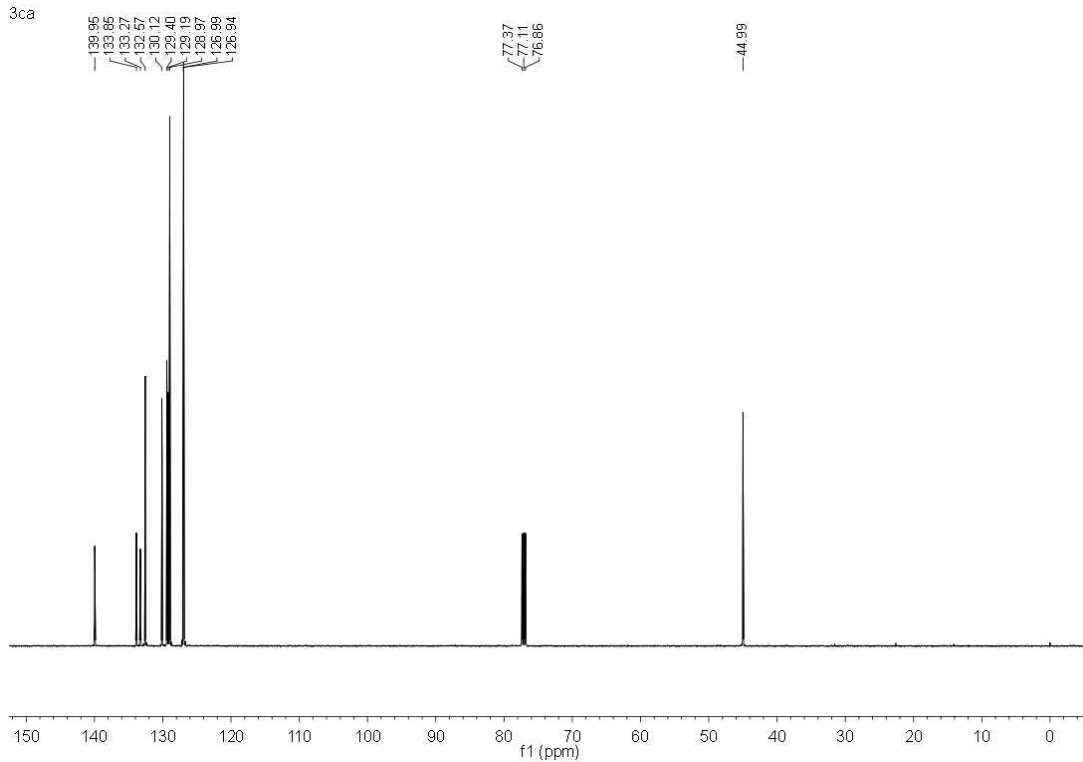

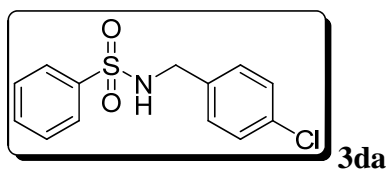

<sup>1</sup>H NMR  
3da

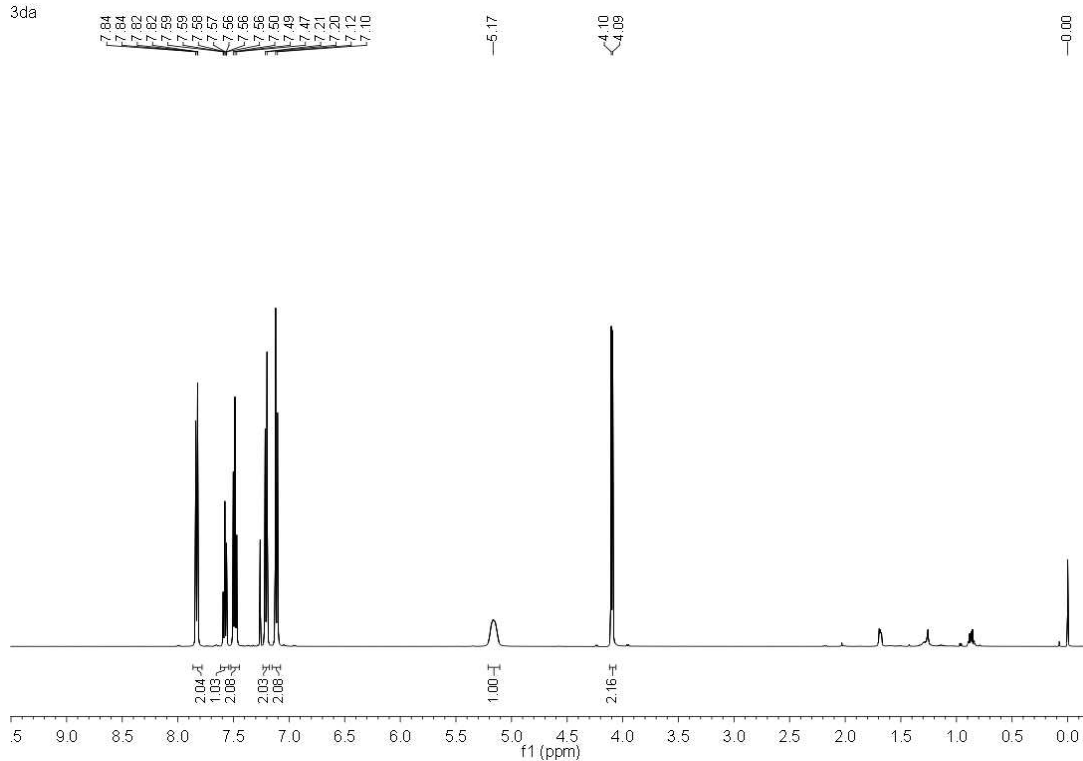

<sup>13</sup>C NMR  
3da

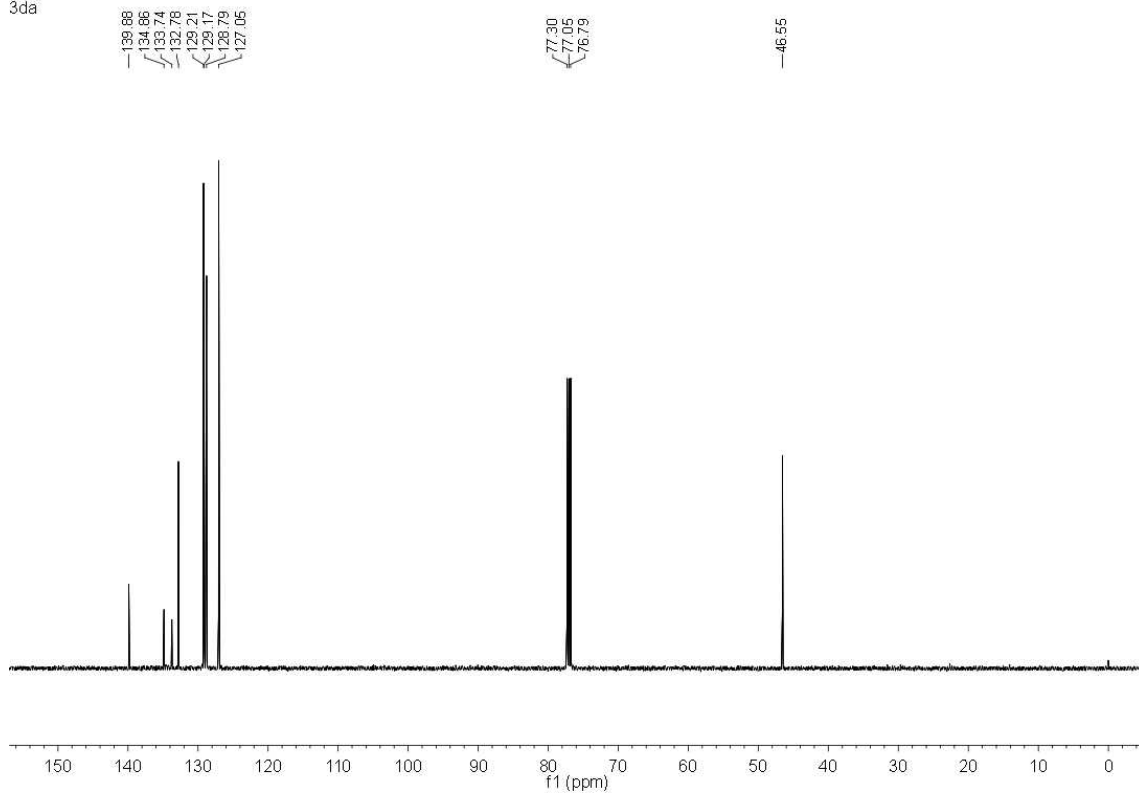

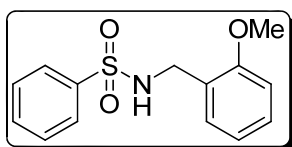

3ea

<sup>1</sup>H NMR

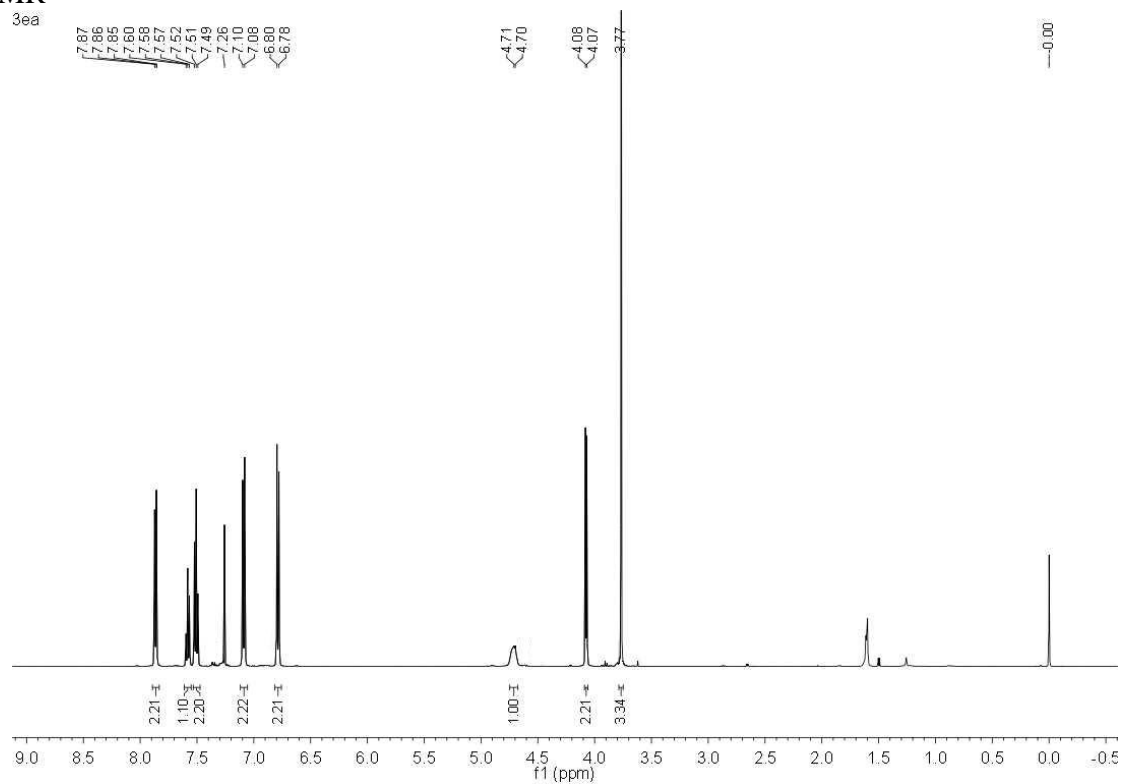

<sup>13</sup>C NMR

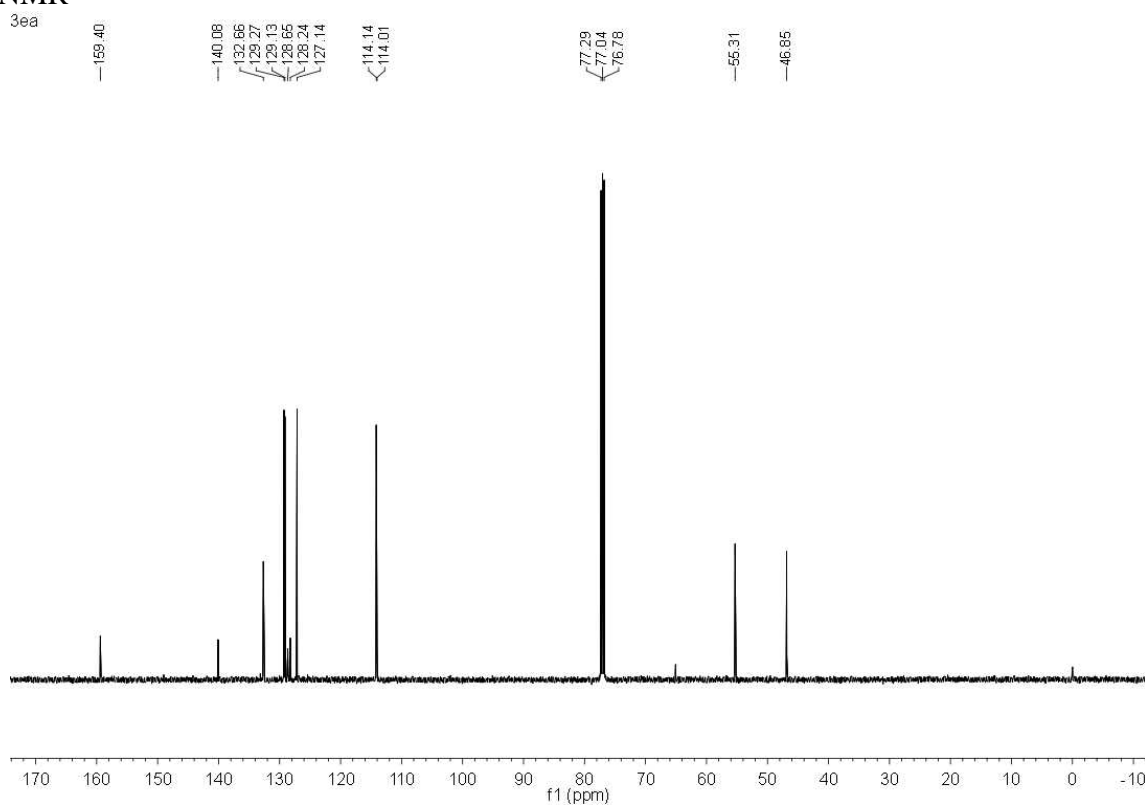

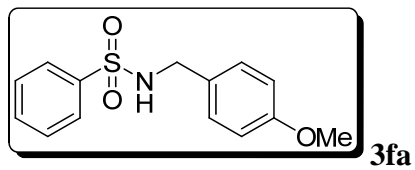

<sup>1</sup>H NMR  
3fa

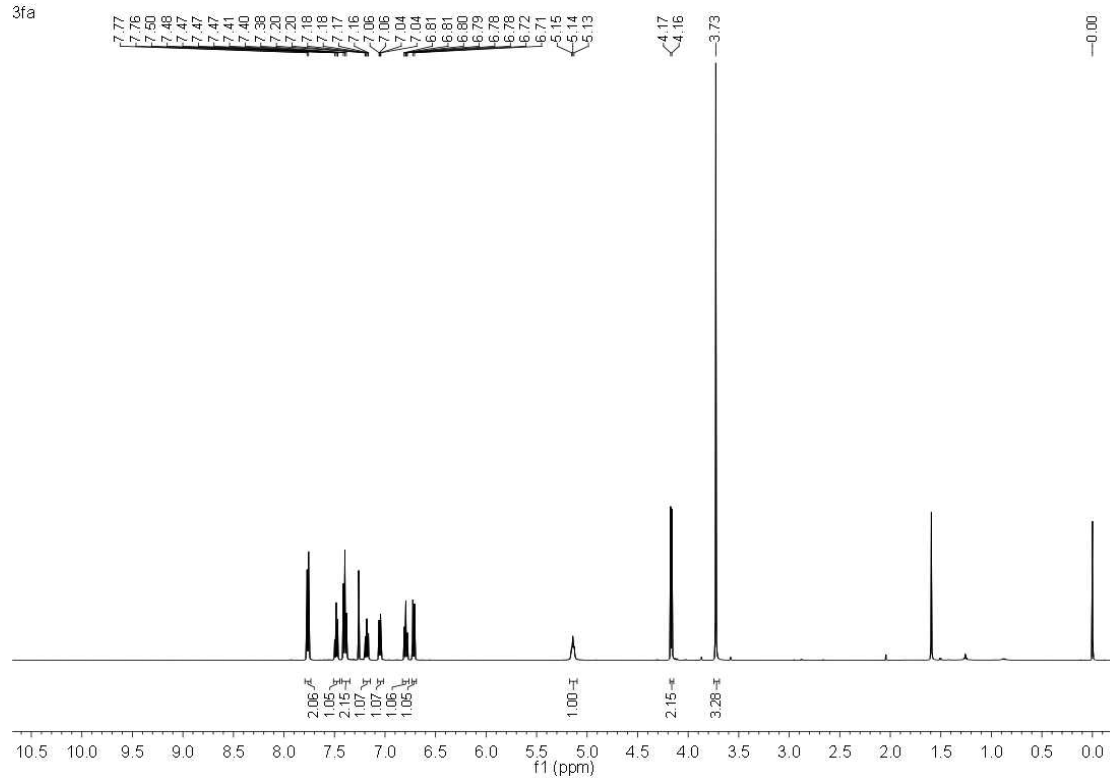

<sup>13</sup>C NMR  
3fa

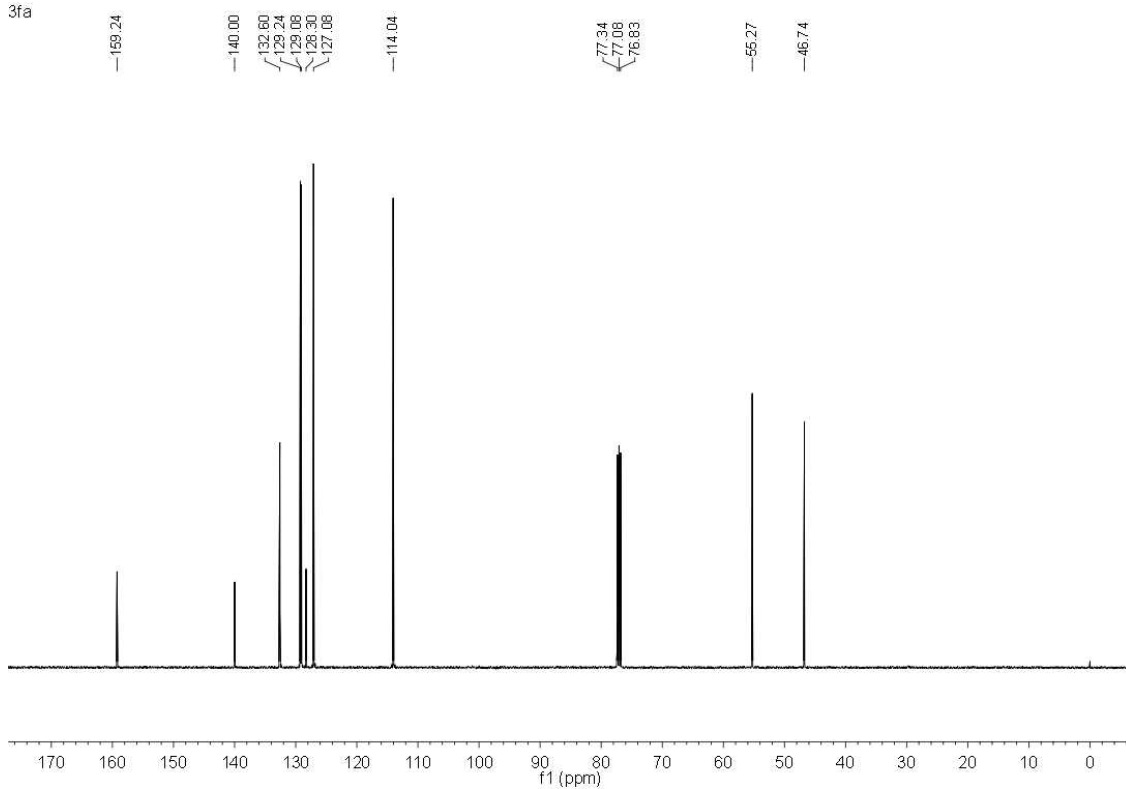

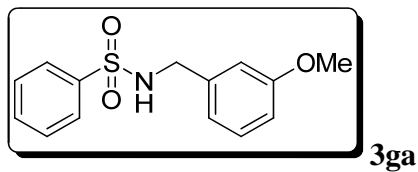

<sup>1</sup>H NMR  
3ga

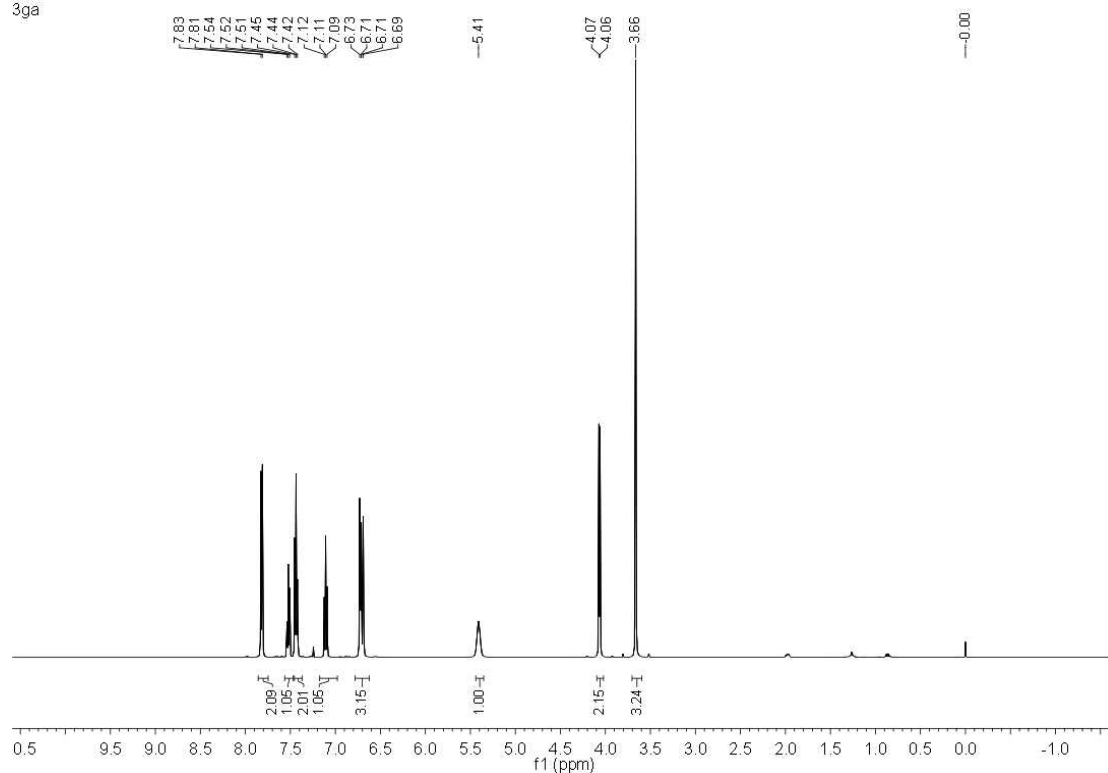

<sup>13</sup>C NMR  
3ga

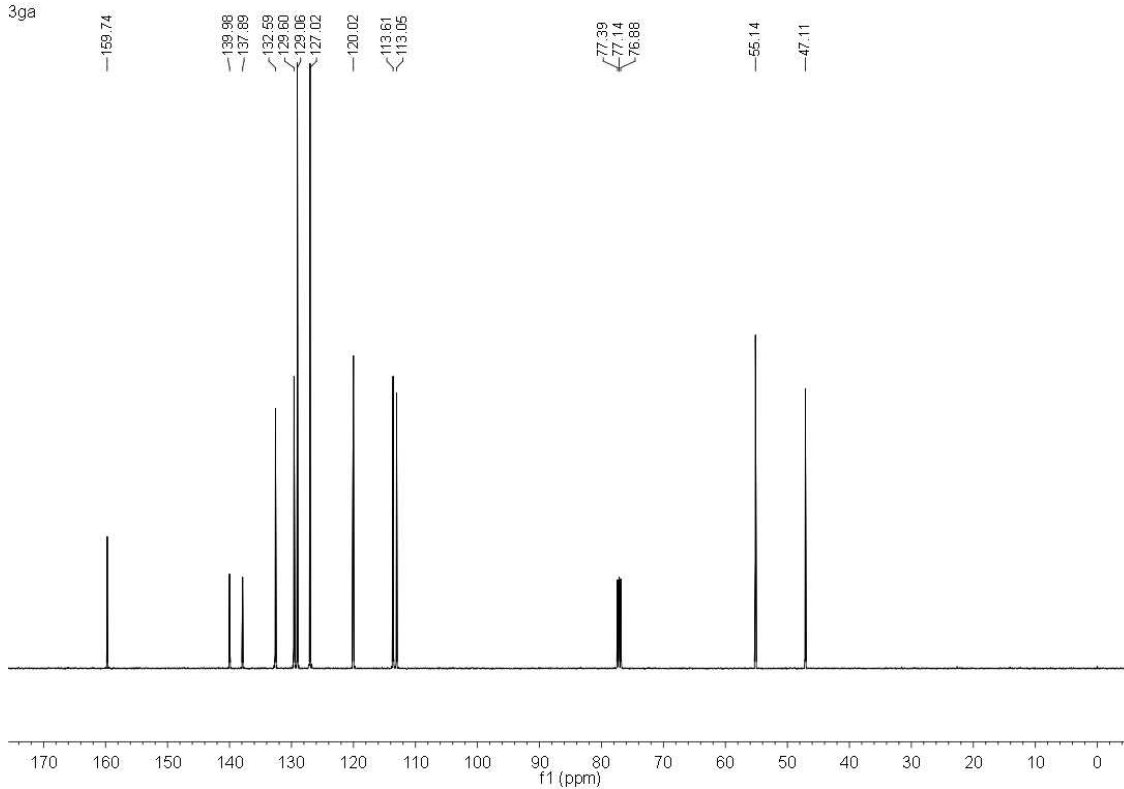



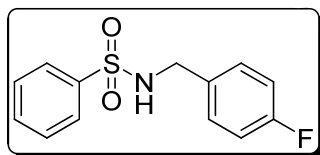

3ha

<sup>1</sup>H NMR

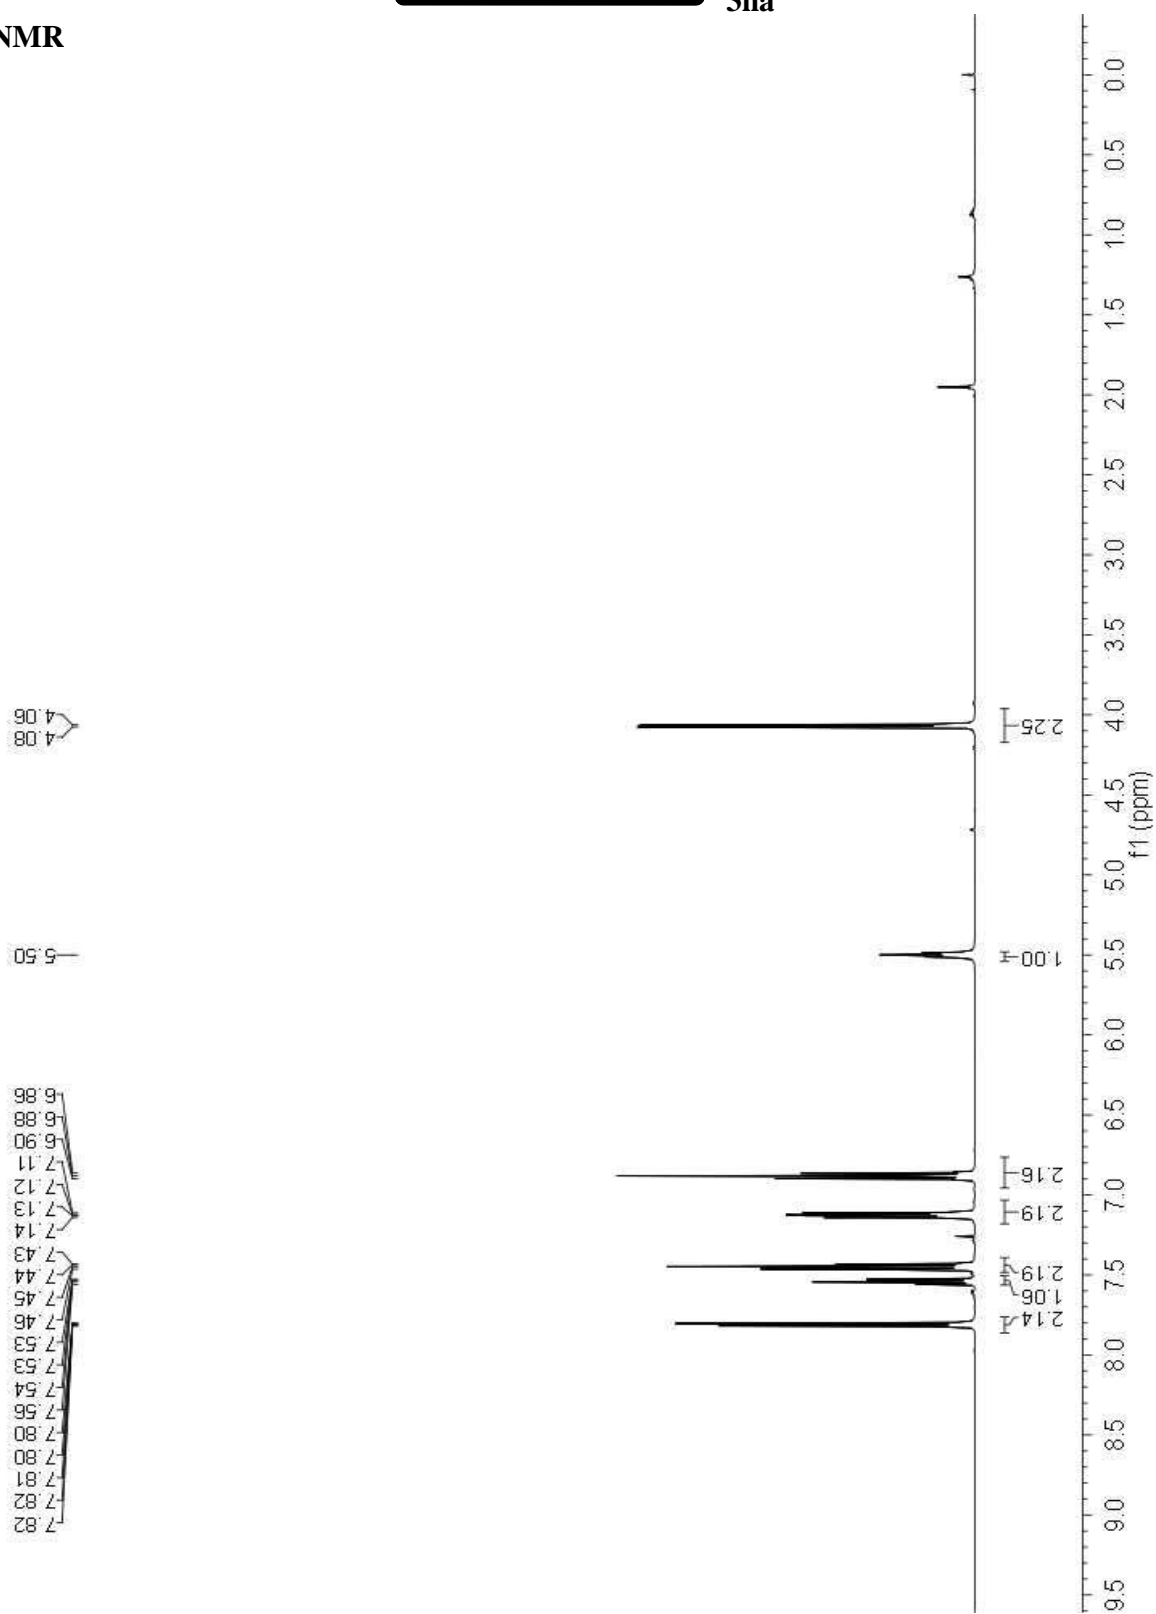

$^{13}\text{C}$  NMR

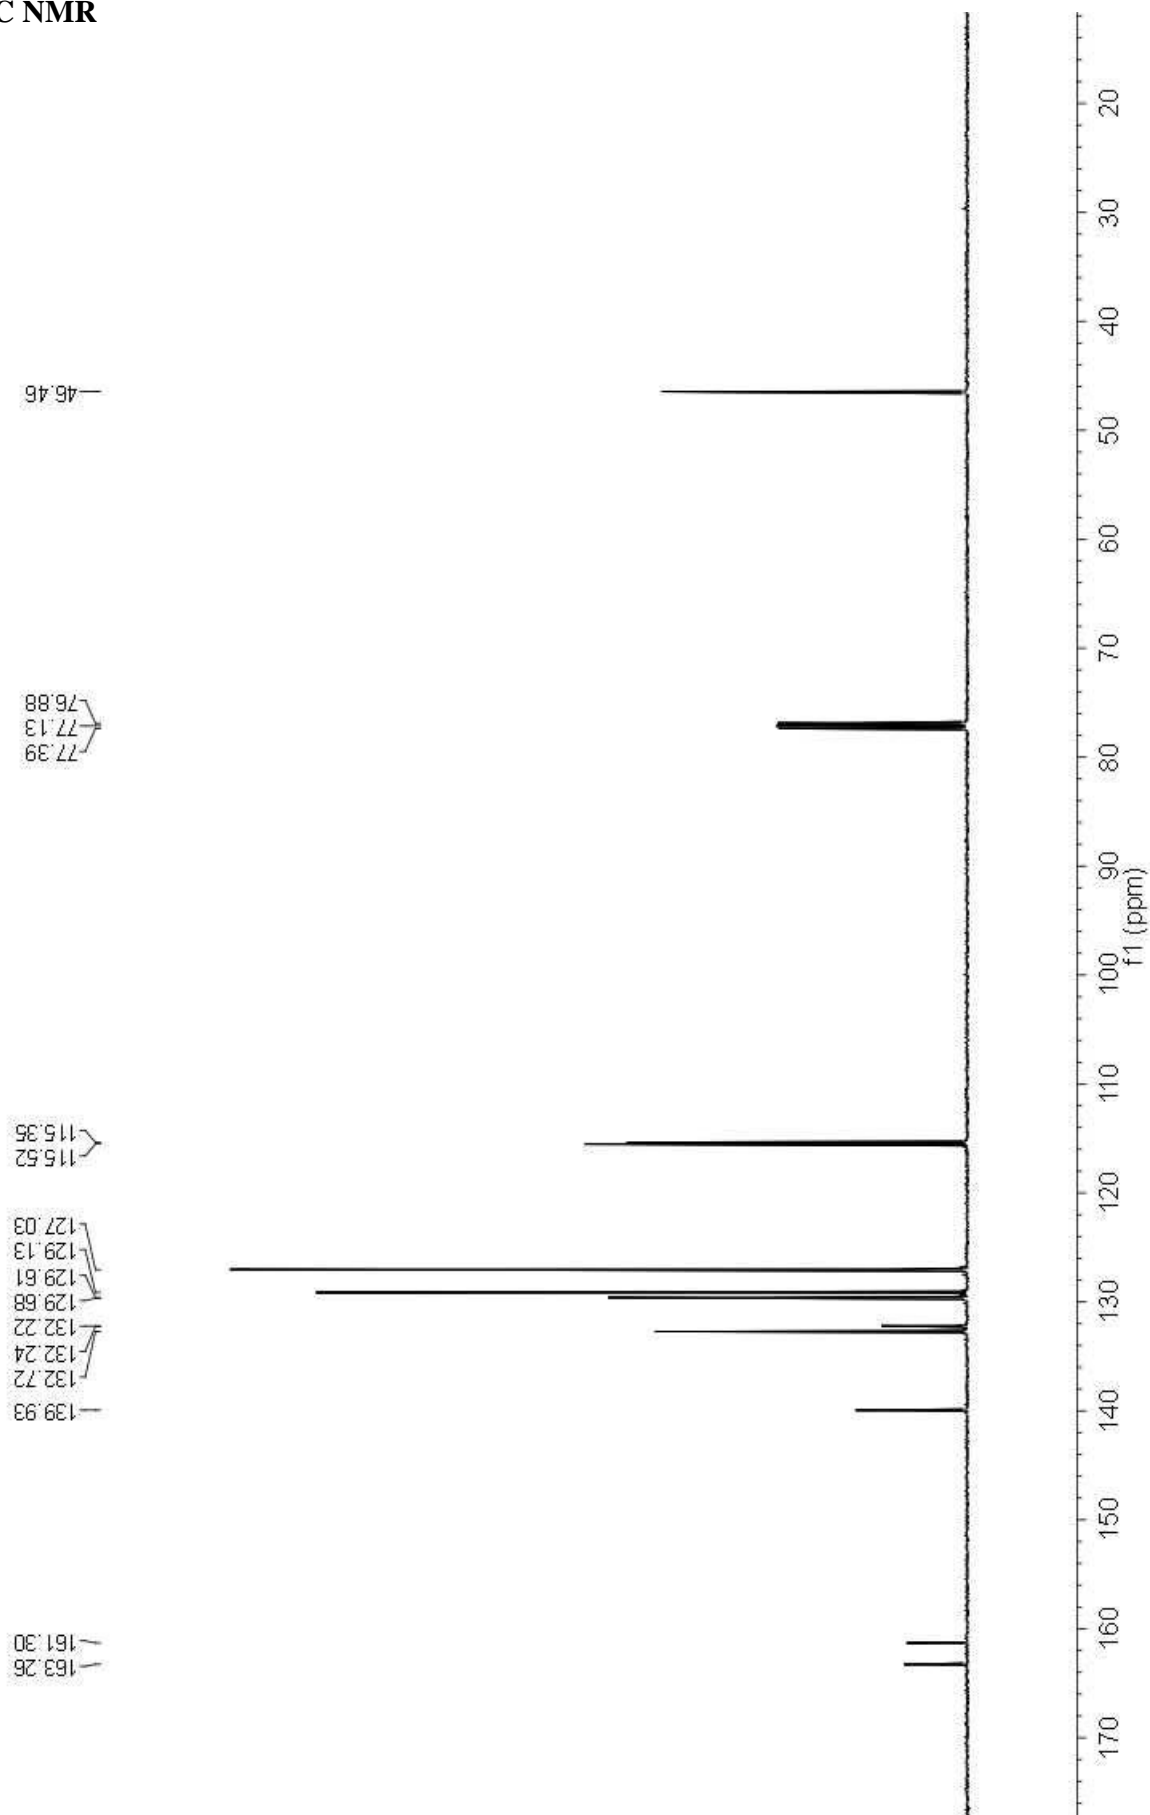

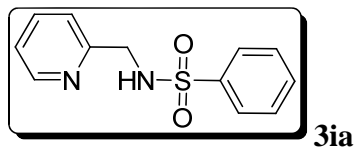

<sup>1</sup>H NMR  
3ia

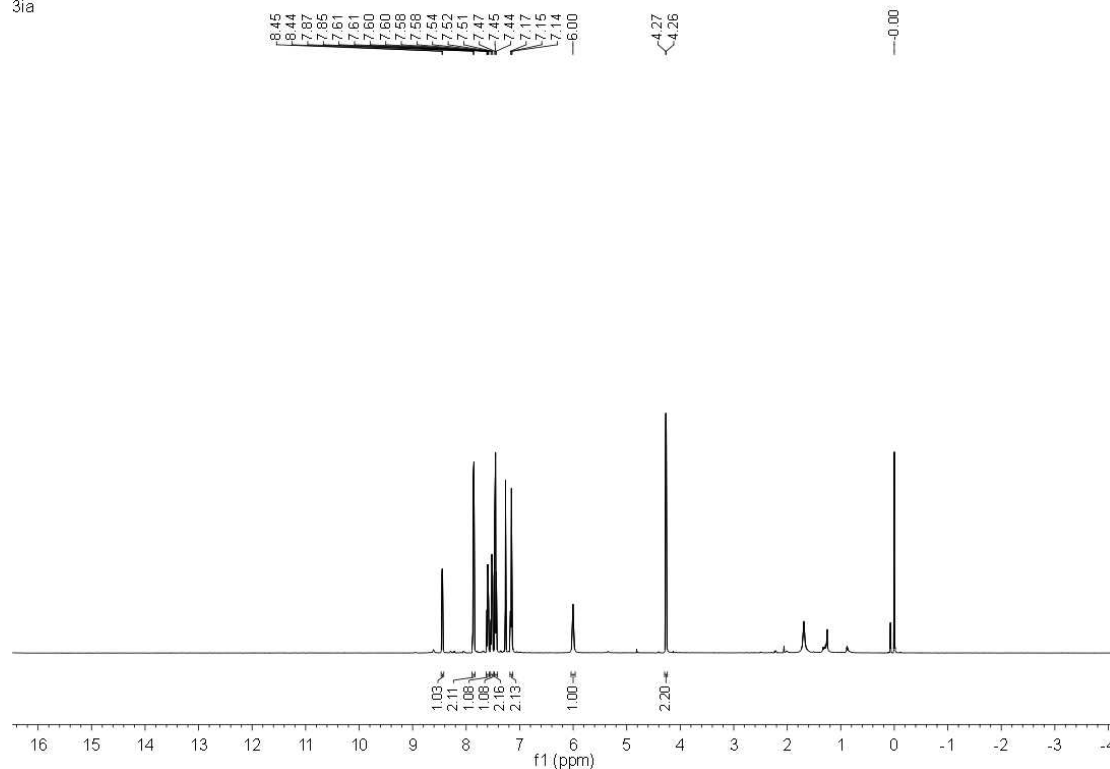

<sup>13</sup>C NMR  
3ia

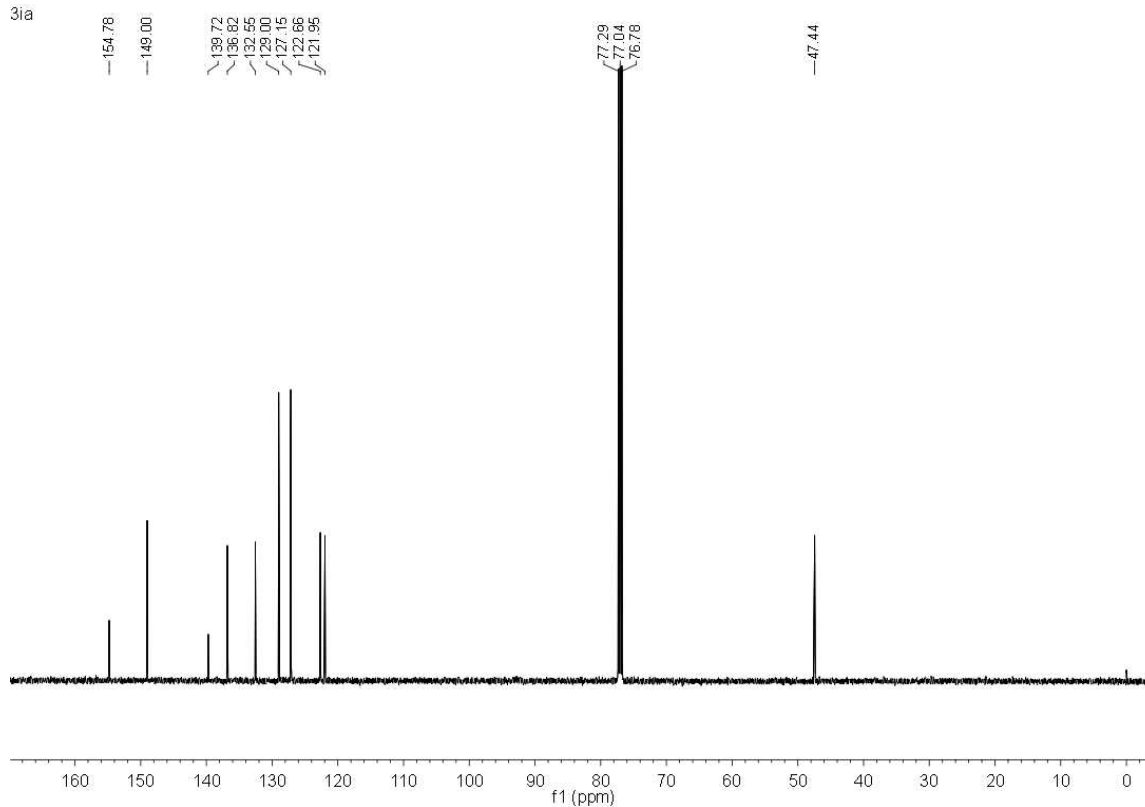

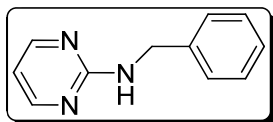

**3aj**

<sup>1</sup>H NMR

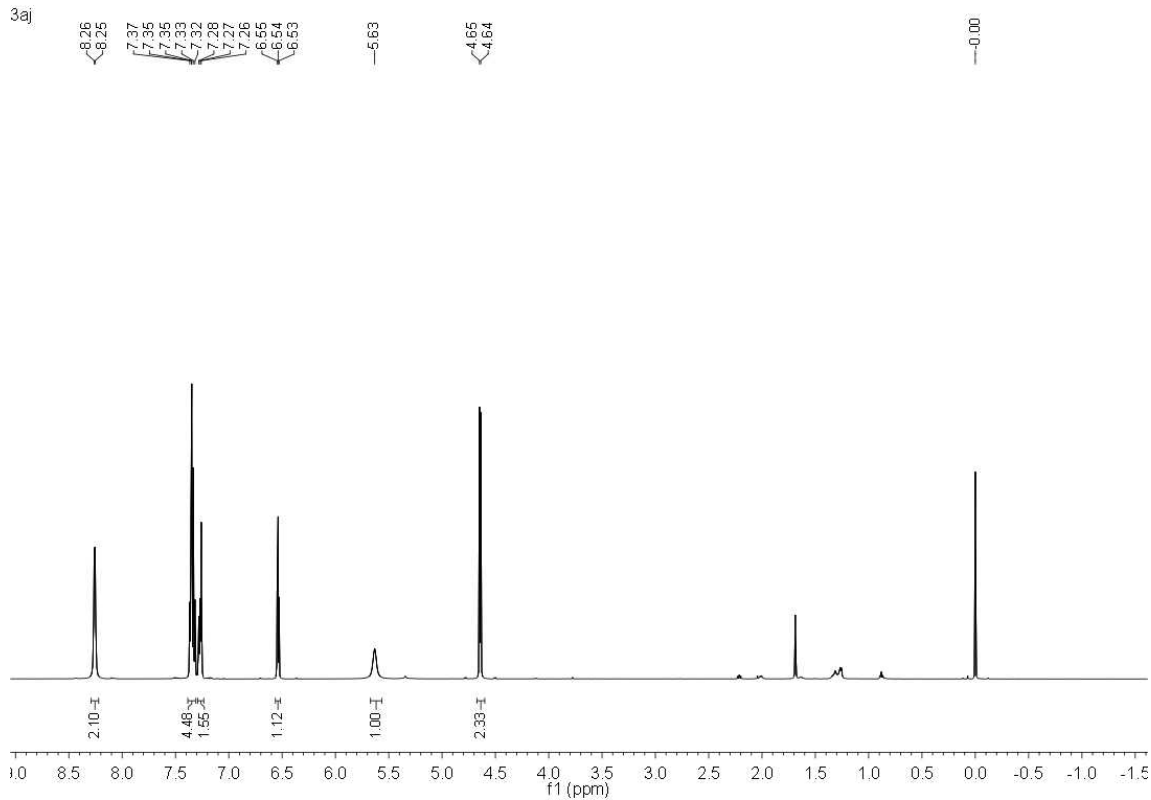

<sup>13</sup>C NMR

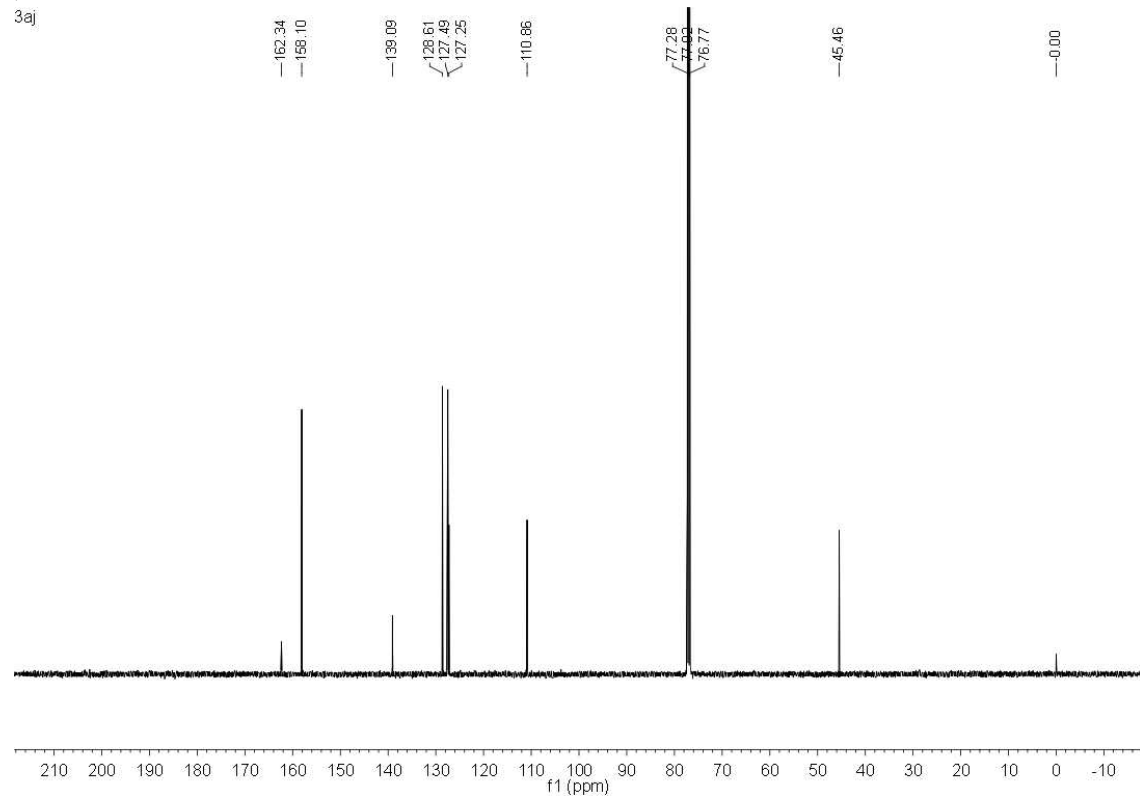

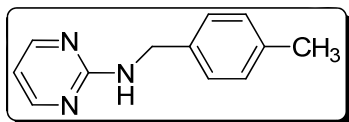

**3bj**

<sup>1</sup>H NMR

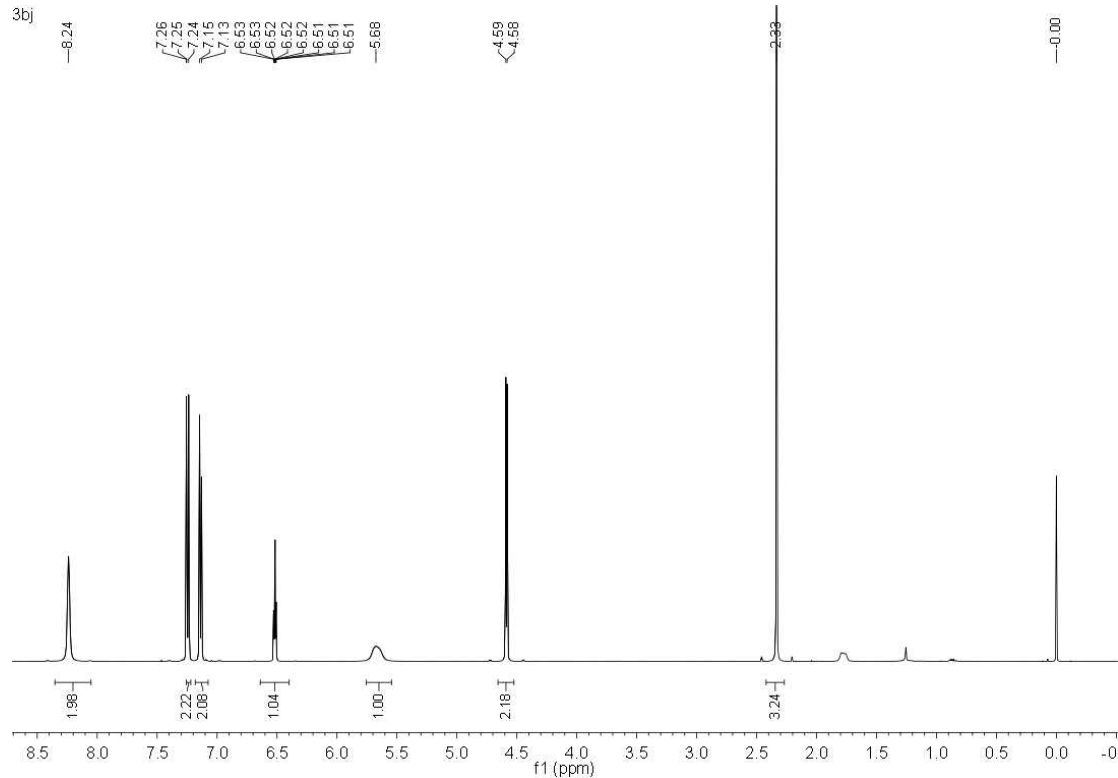

<sup>13</sup>C NMR

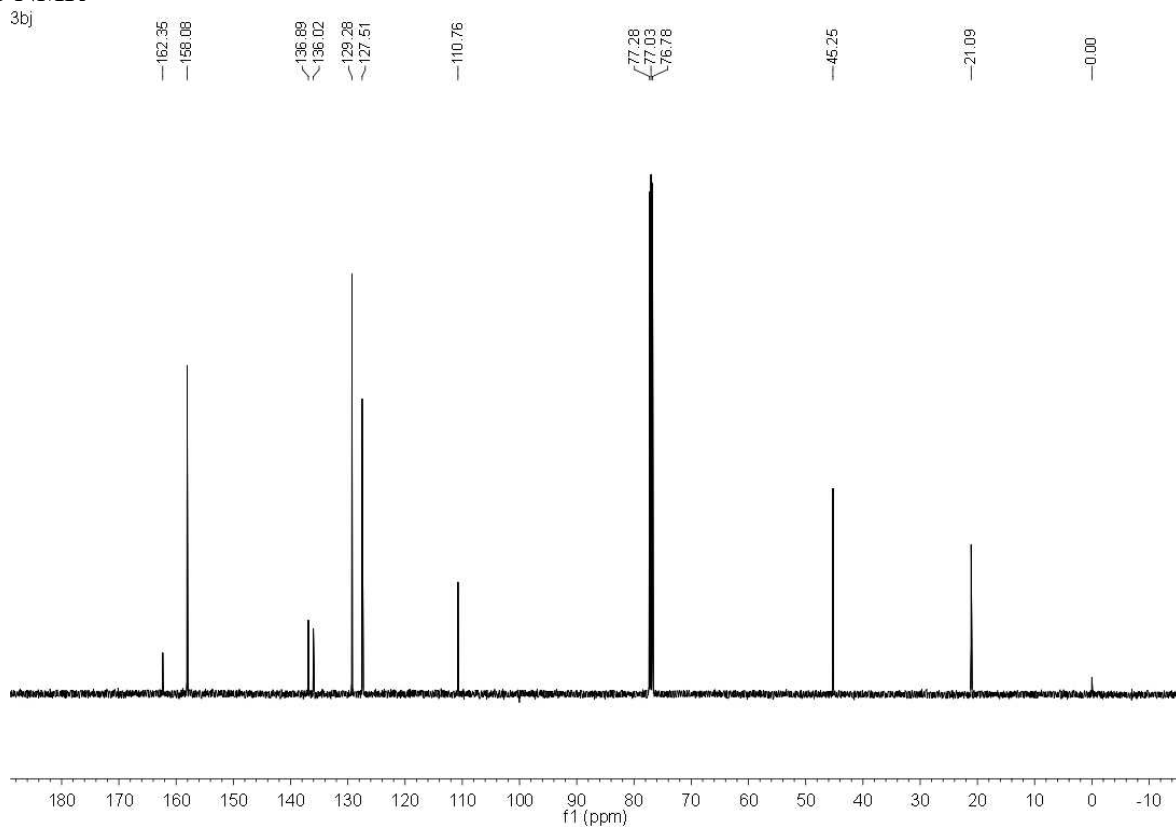

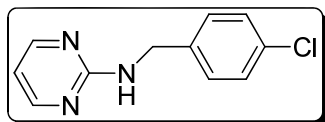

**3dj**

<sup>1</sup>H NMR

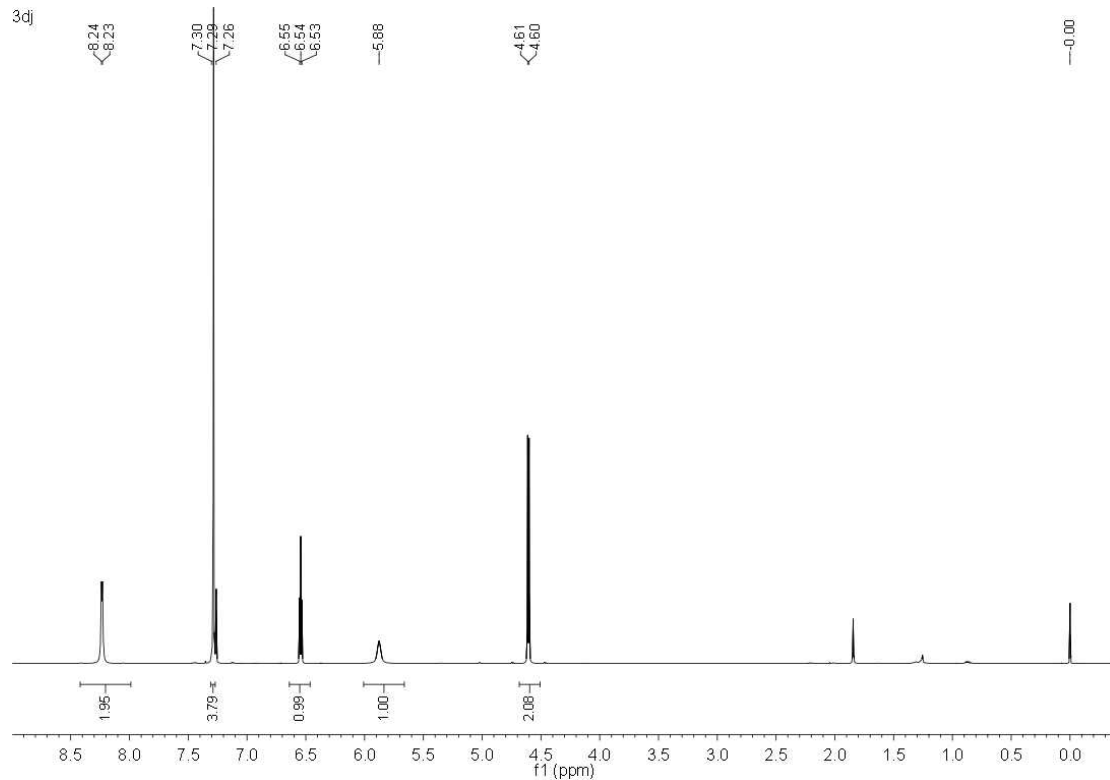

<sup>13</sup>C NMR

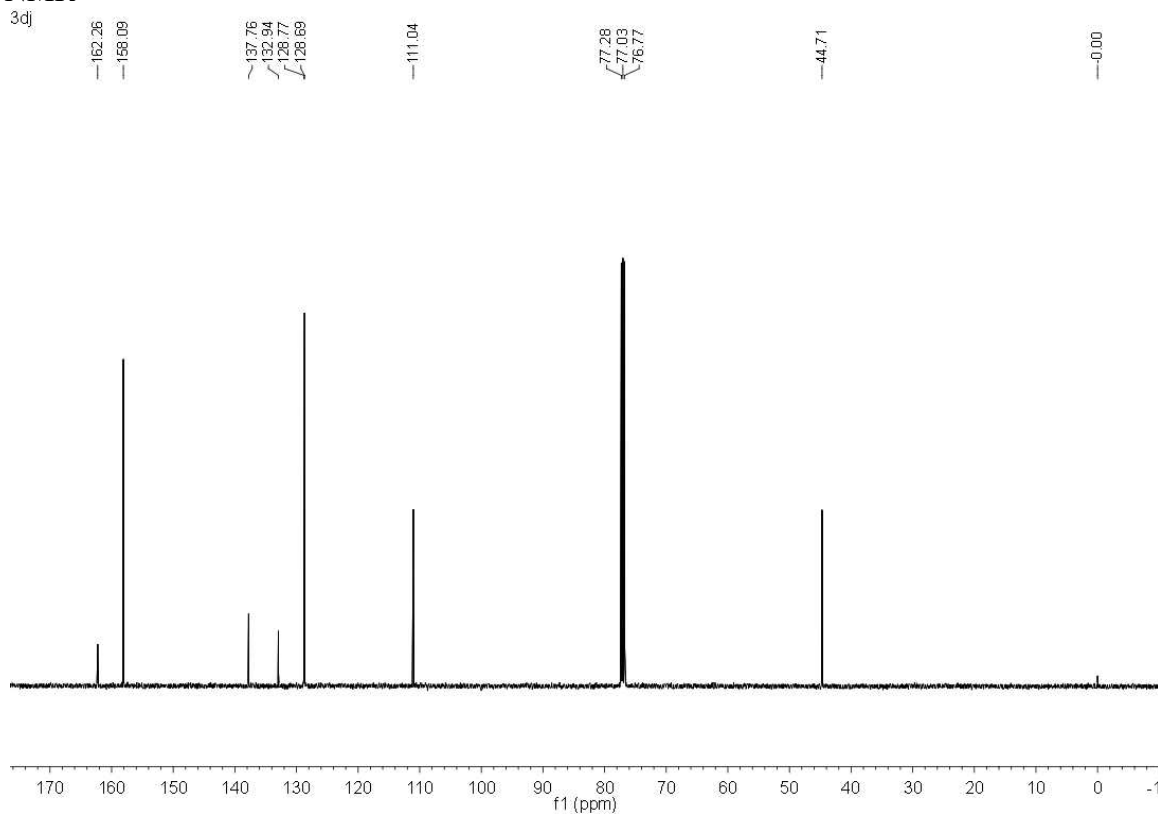

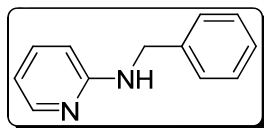

**3ak**

<sup>1</sup>H NMR

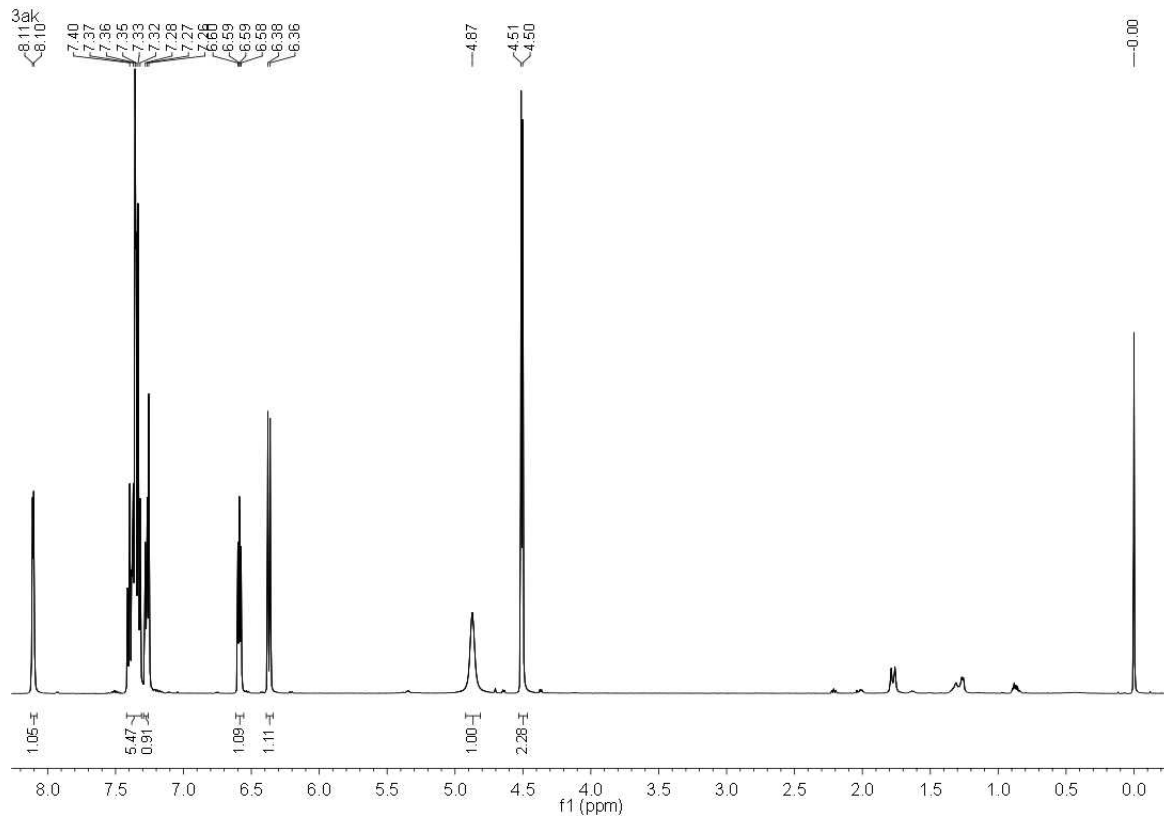

<sup>13</sup>C NMR

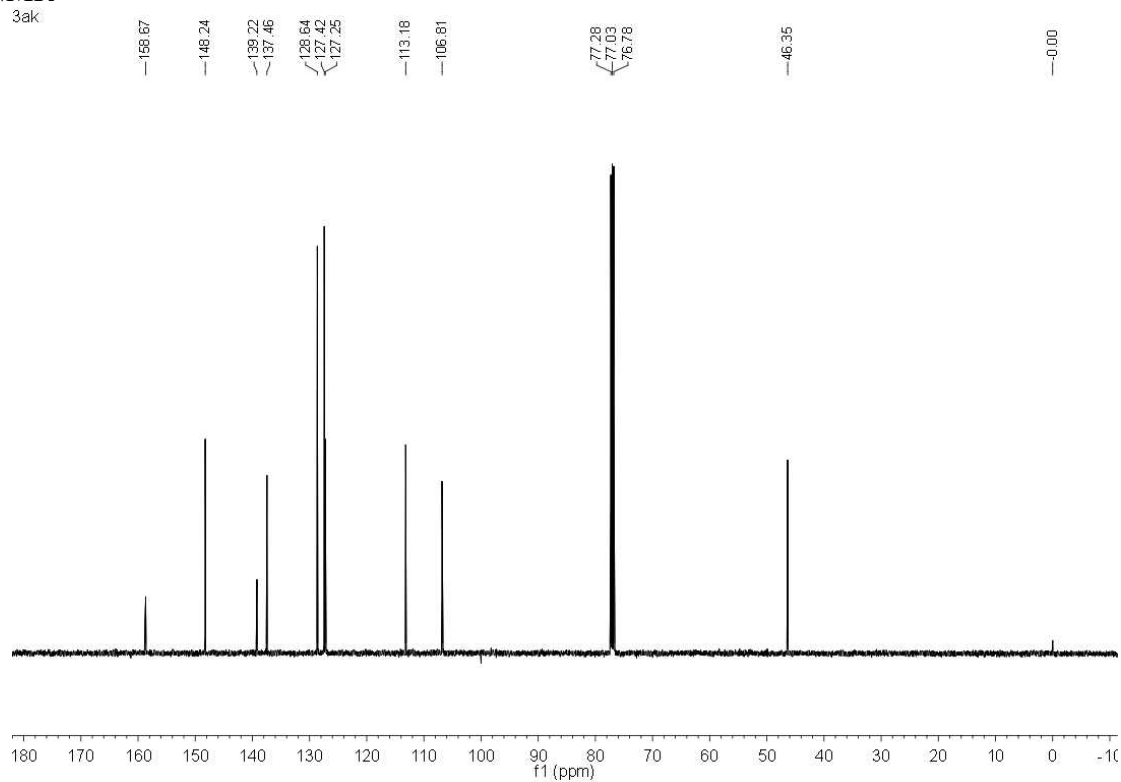

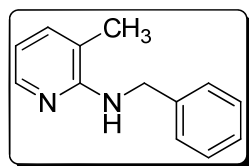

**3al**

<sup>1</sup>H NMR

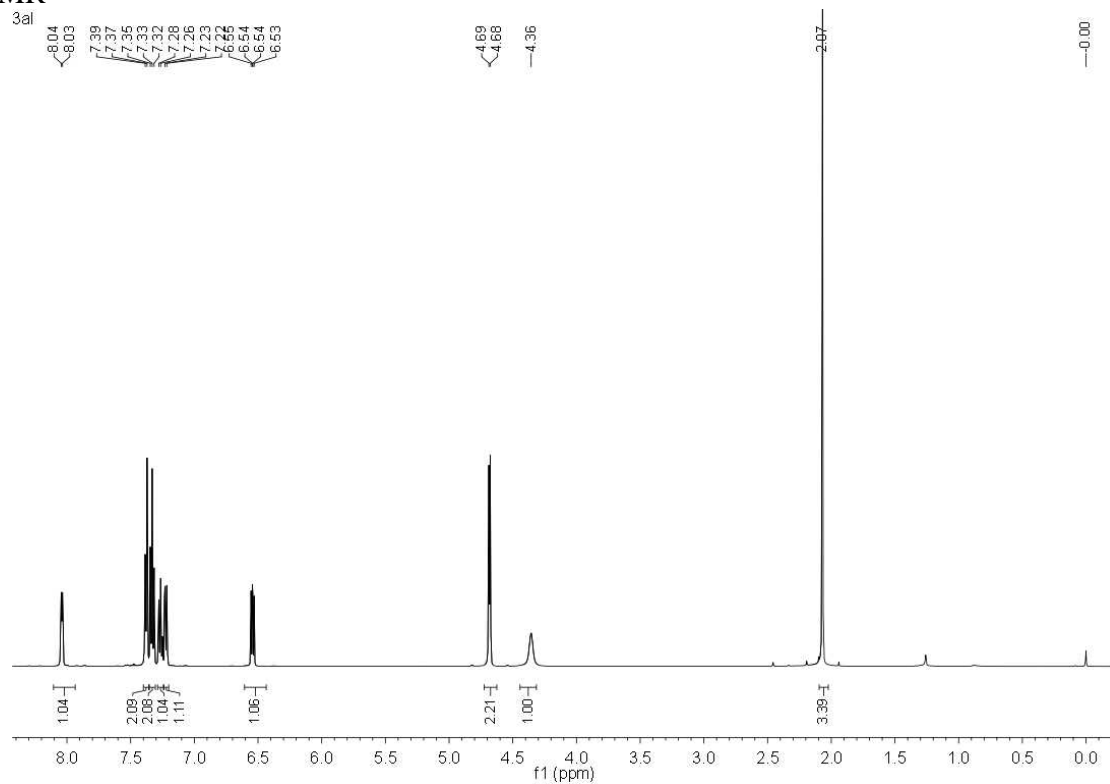

<sup>13</sup>C NMR

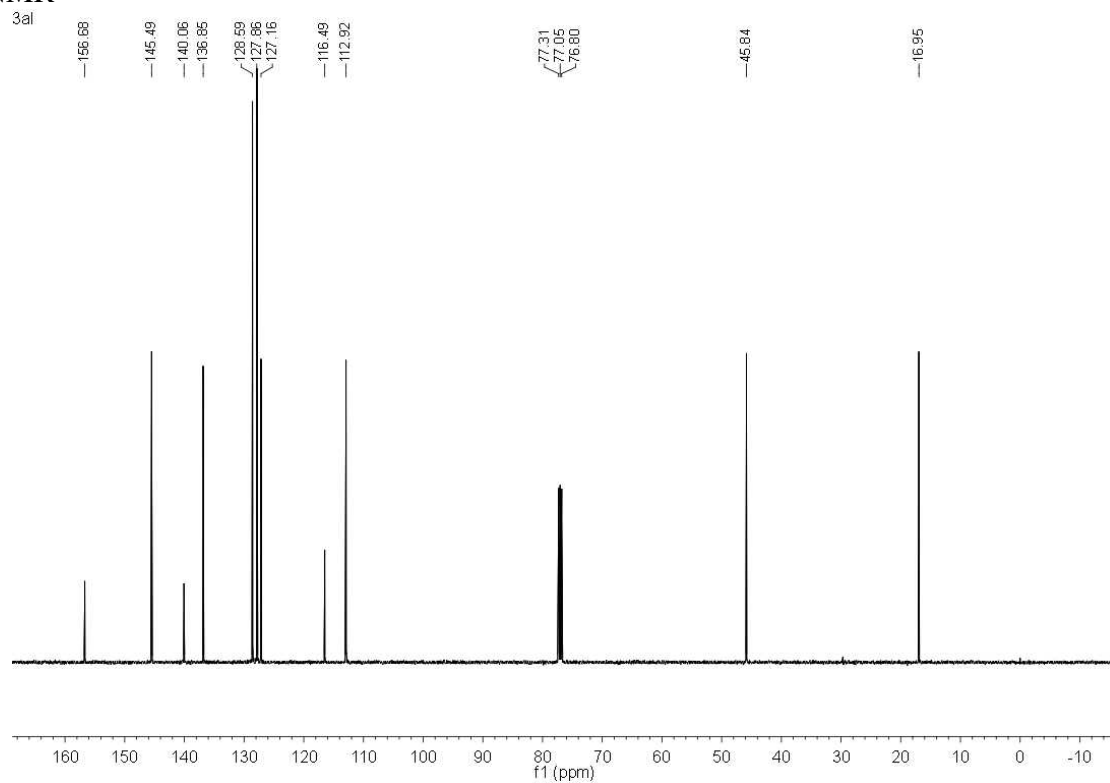



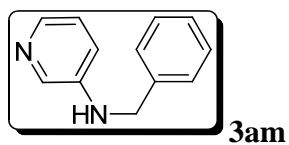

<sup>1</sup>H NMR

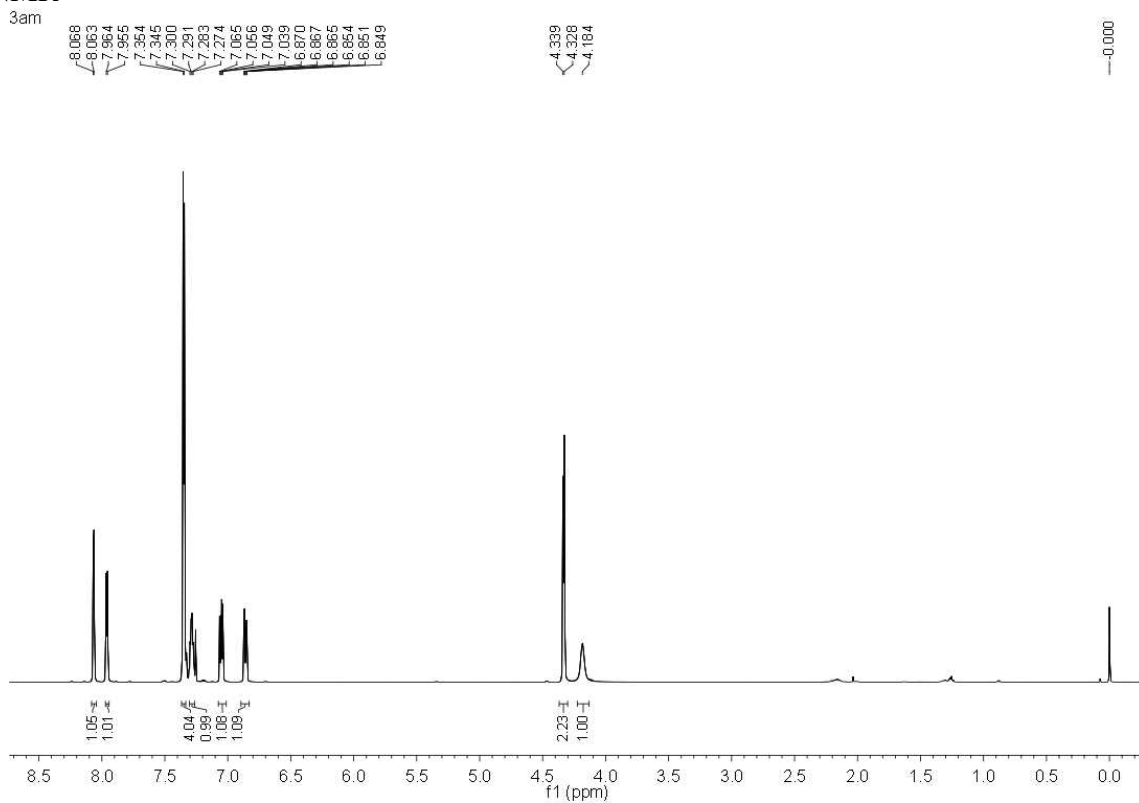

<sup>13</sup>C NMR

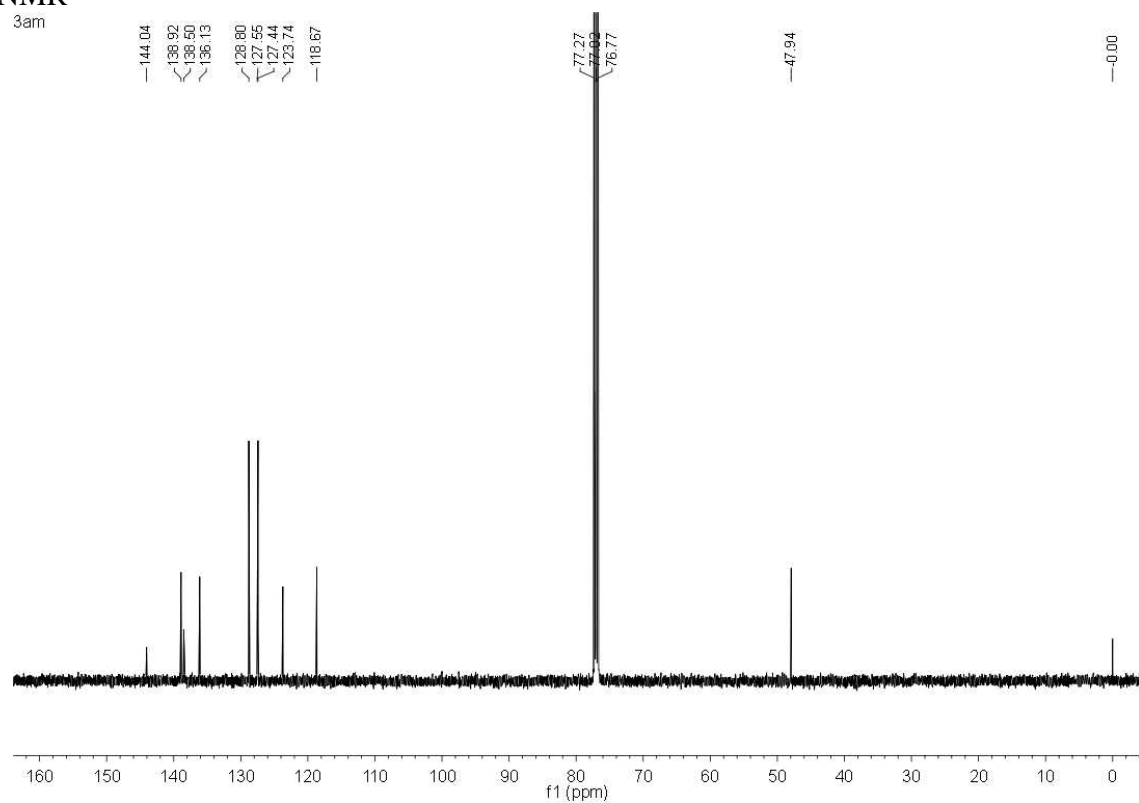

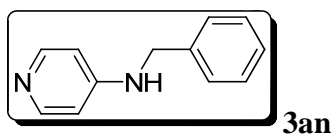

<sup>1</sup>H NMR

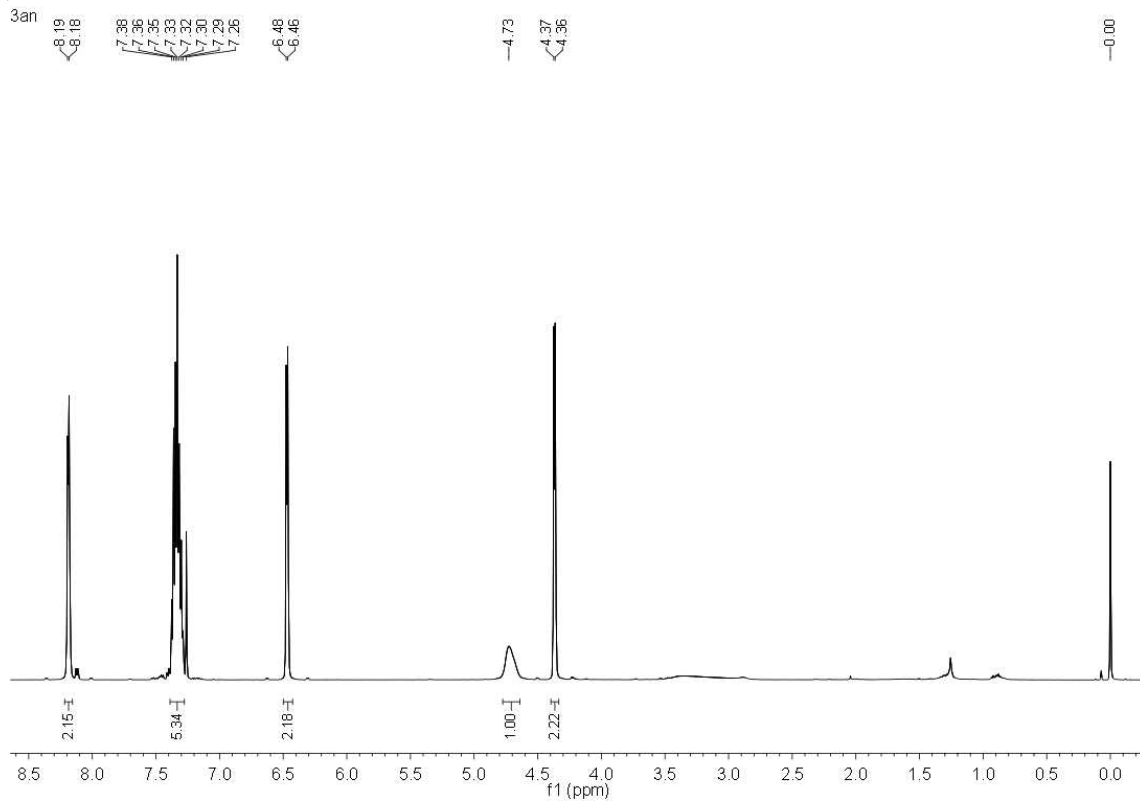

<sup>13</sup>C NMR

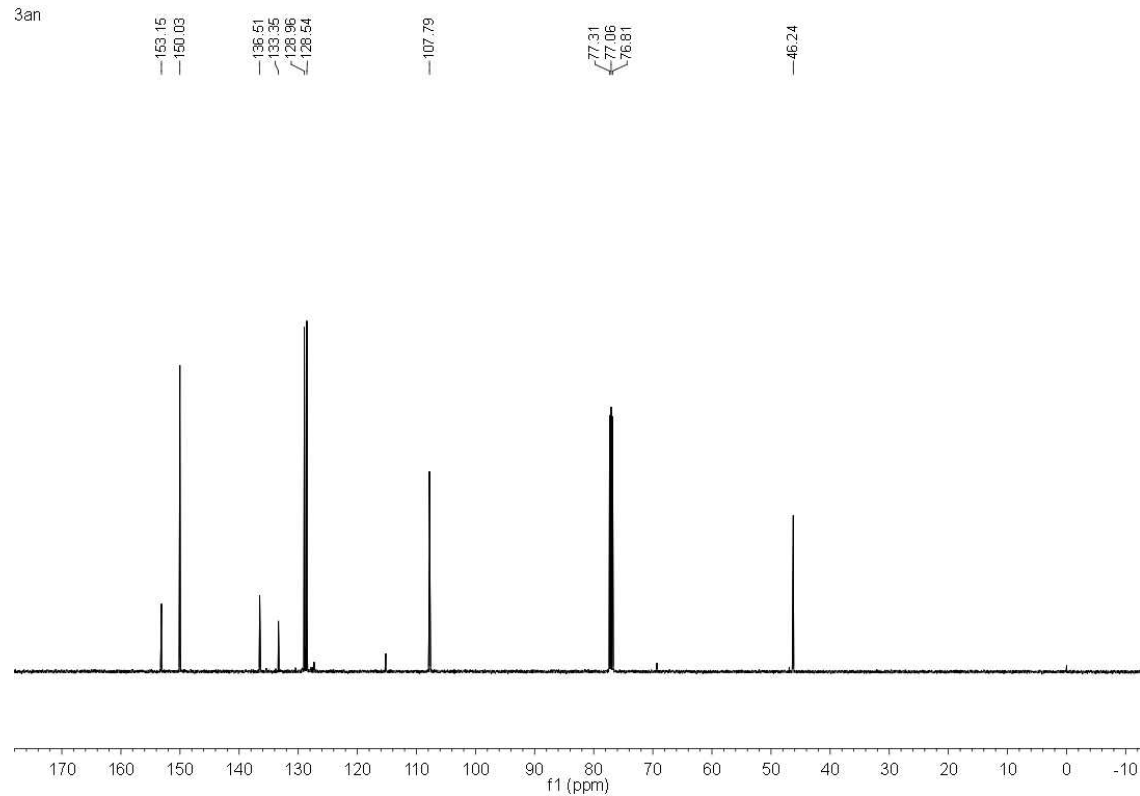

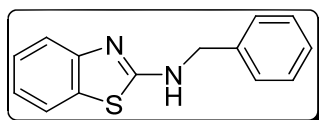

**3ao**

<sup>1</sup>H NMR

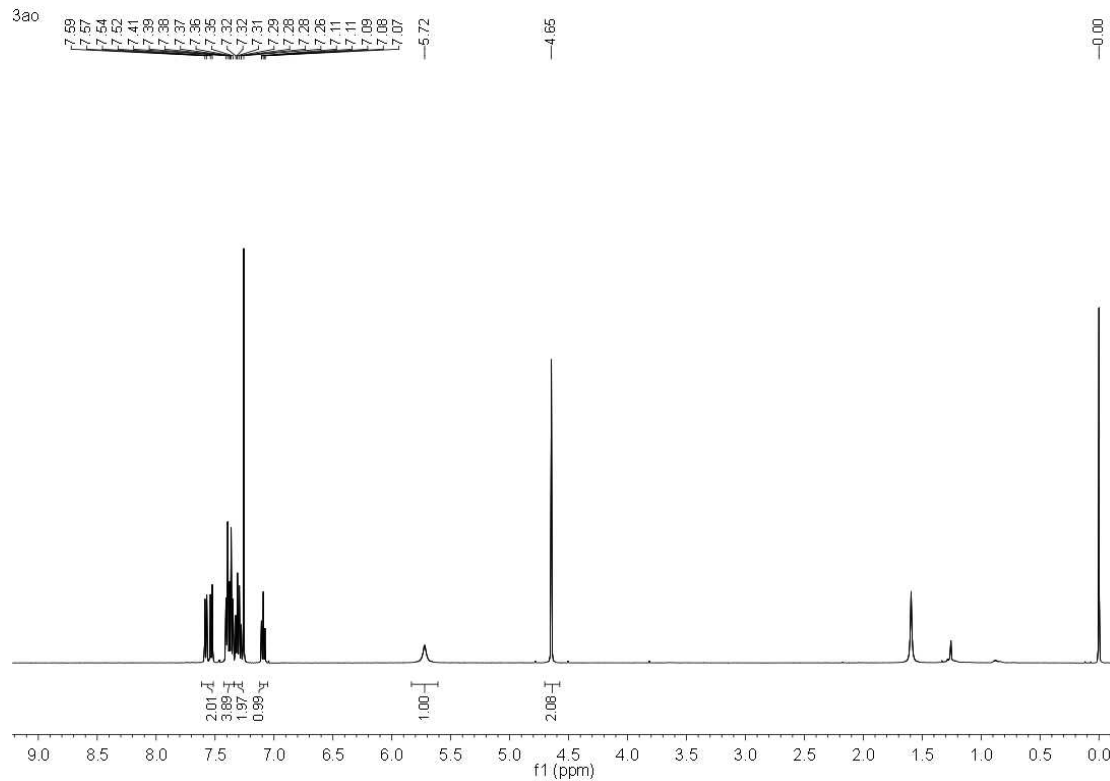

<sup>13</sup>C NMR

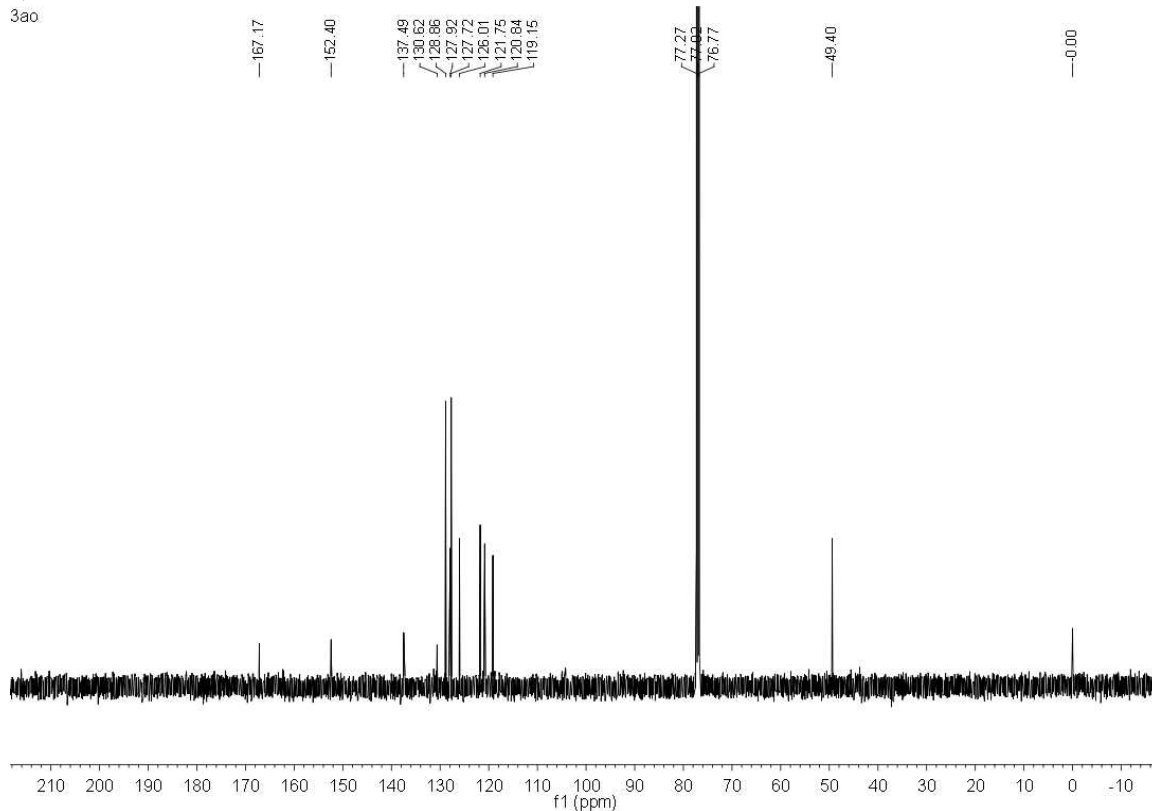

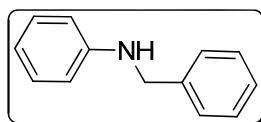

**3ap**

<sup>1</sup>H NMR

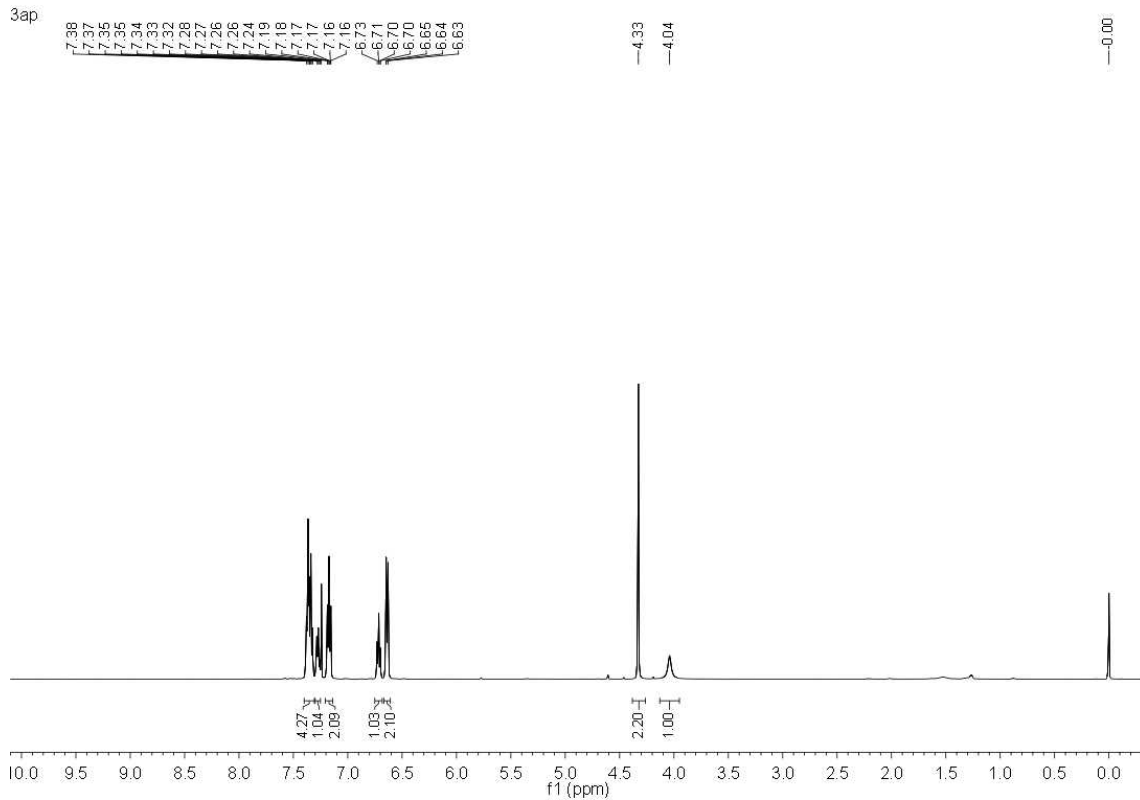

<sup>13</sup>C NMR

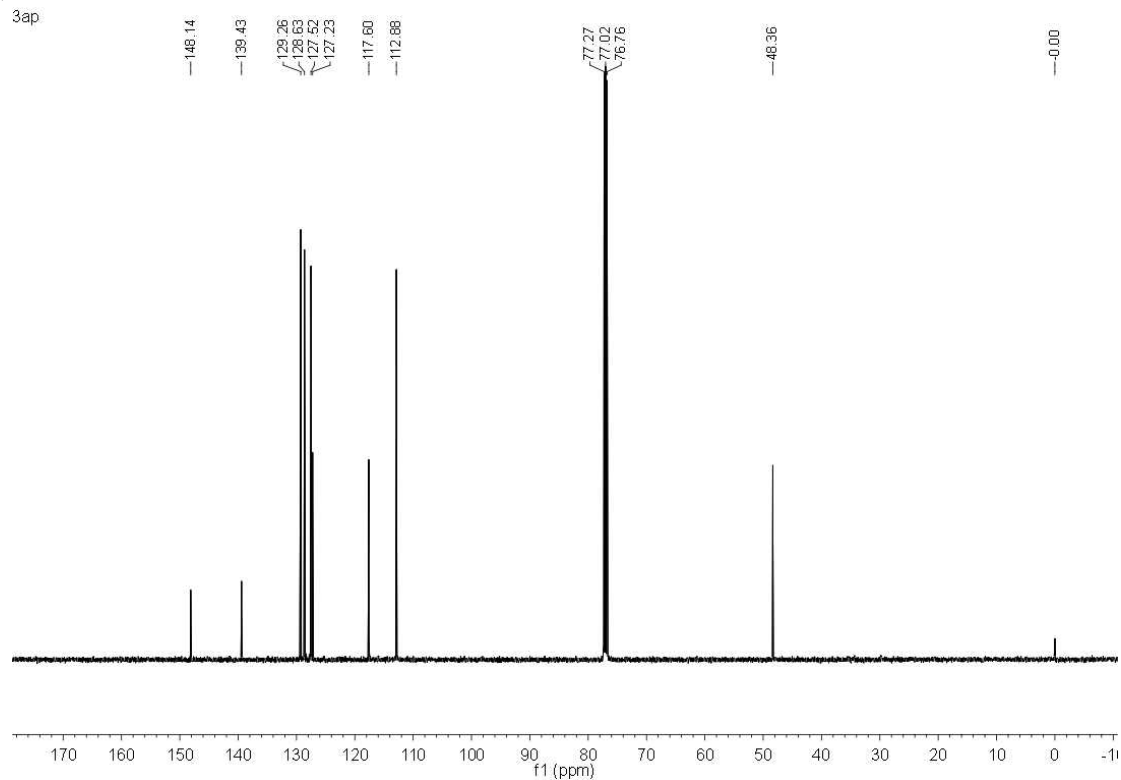

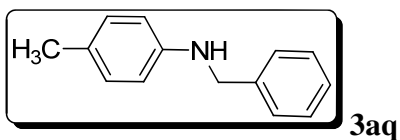

<sup>1</sup>H NMR  
3aq

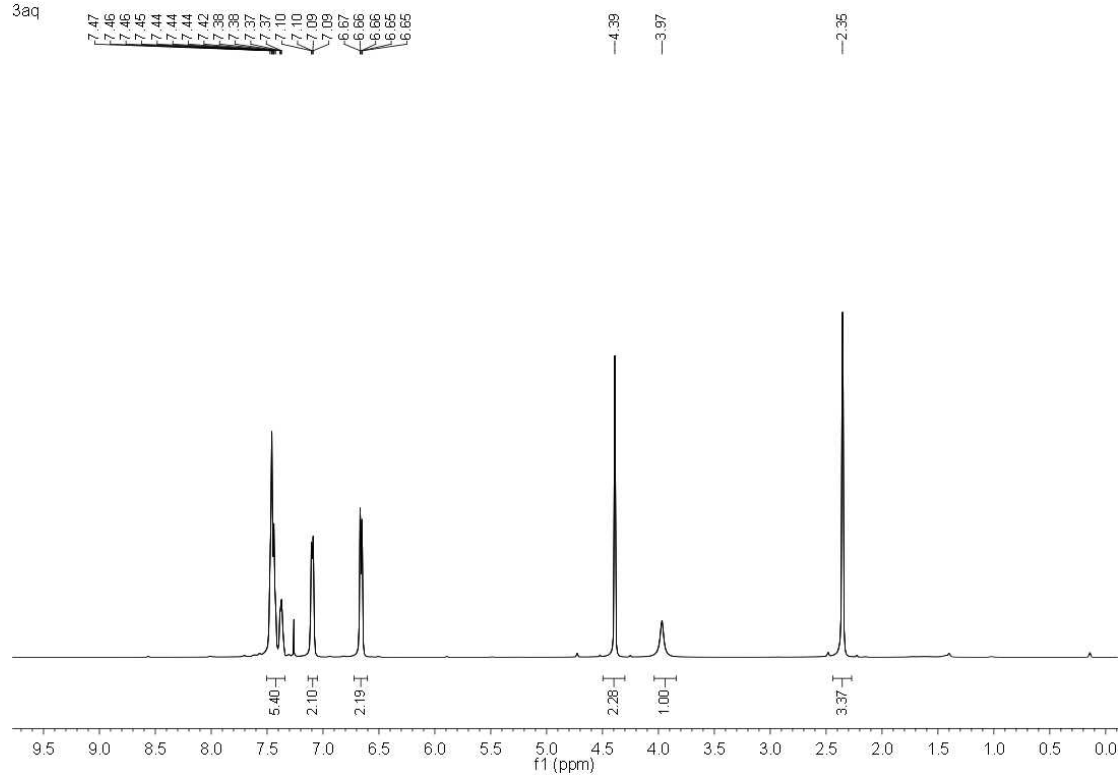

<sup>13</sup>C NMR  
3aq

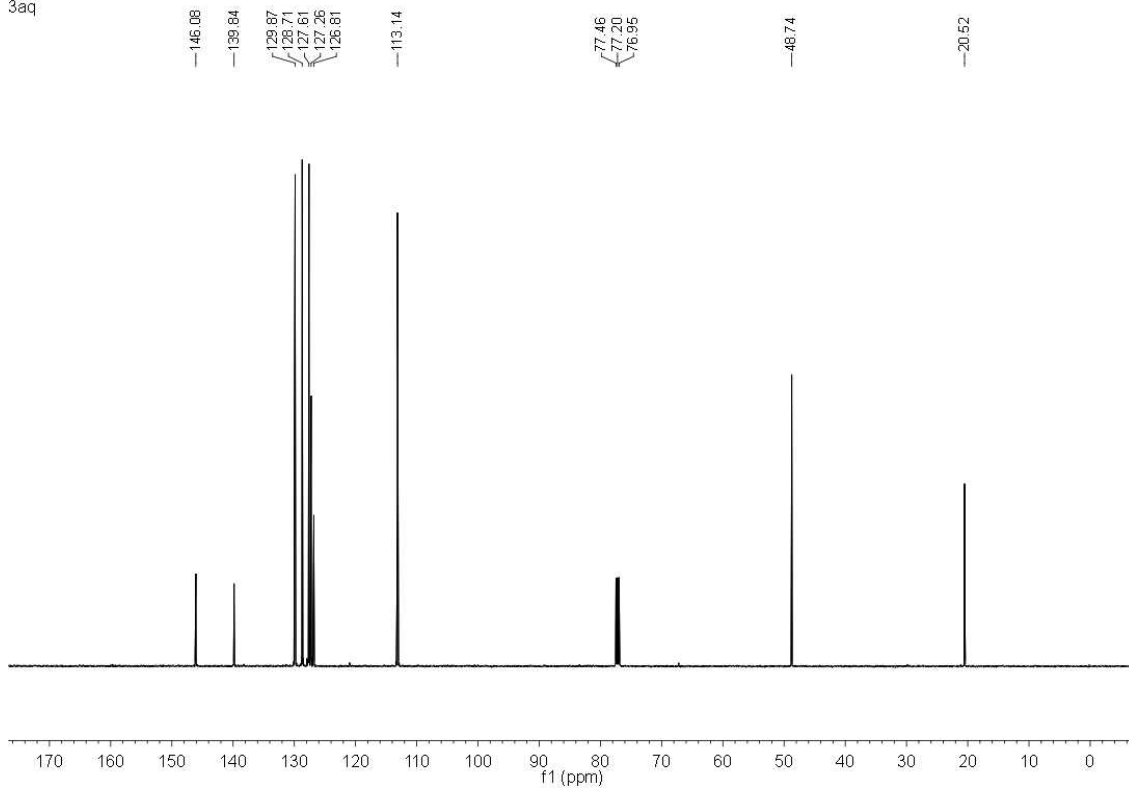

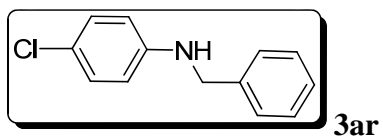

<sup>1</sup>H NMR

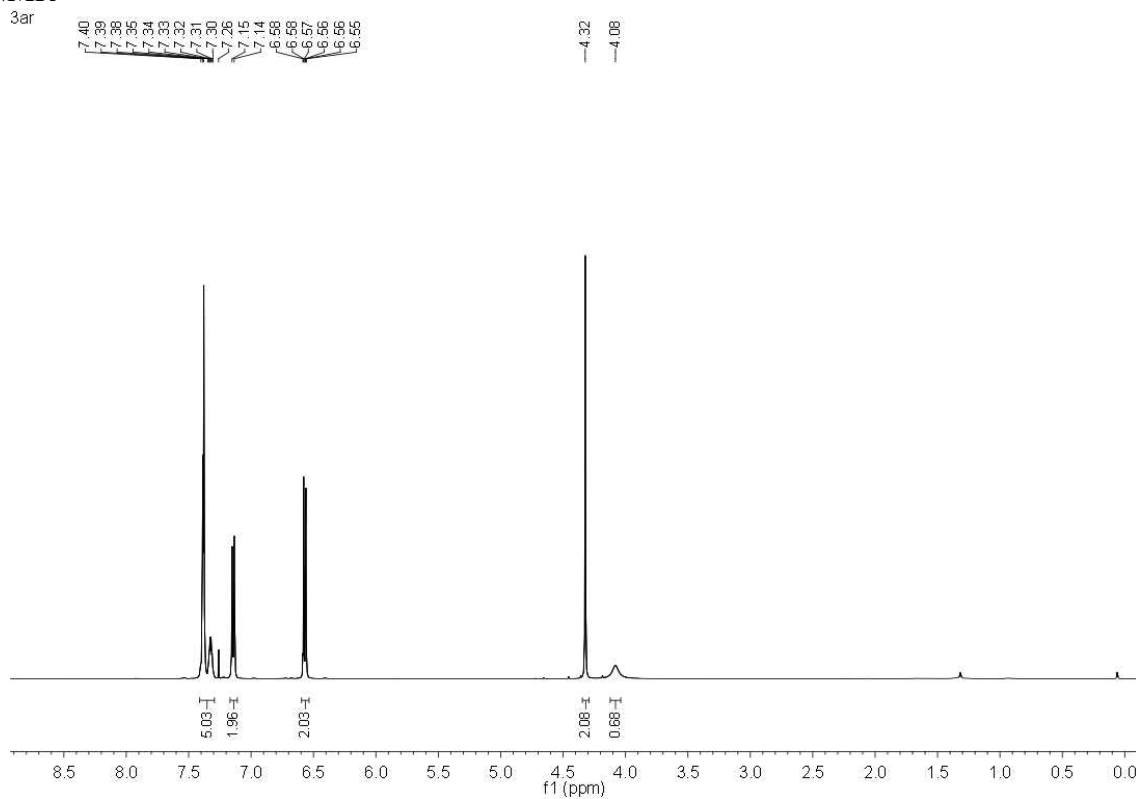

<sup>13</sup>C NMR

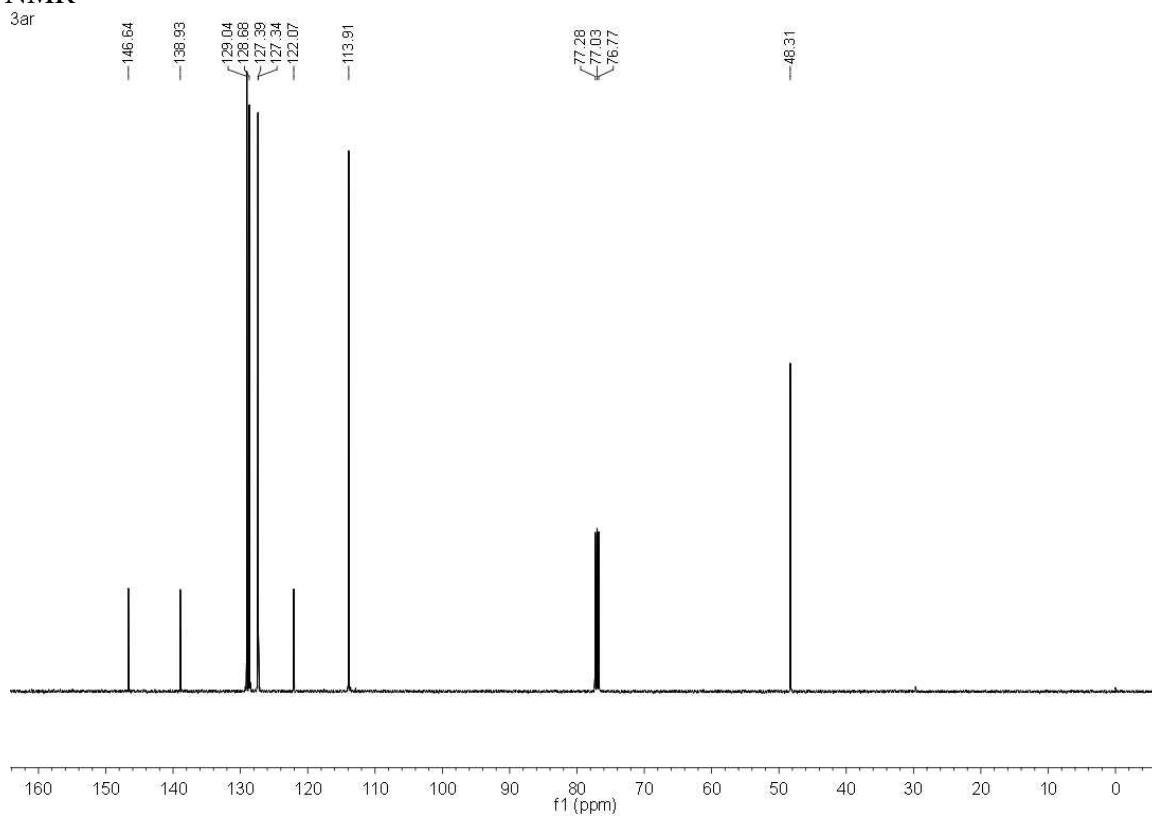

Supplement: c1ob06743e.pdf [file c1ob06743e.pdf]
